# Supplementary material for: Unprecedented intramolecular [3 + 2] cycloadditions of azido-ketenimines and azido-carbodiimides. Synthesis of indolo[1,2-a]quinazolines and tetrazolo[5,1-b]quinazolines
Source: Royal Society of Chemistry journal article supplement (doi:10.1039/c1ob05745f), 2011-01-01

# Unprecedented Intramolecular [3+2] Cycloadditions Azido-ketenimines and Azido-carbodiimides. Synthesis of Indolo[1,2-*a*]quinazolines and Tetrazolo[5,1-*b*]quinazolines

Mateo Alajarin,<sup>a</sup> Baltasar Bonillo,<sup>a</sup> Maria-Mar Ortin,<sup>a</sup> Raul-Angel Orenes<sup>b</sup> and Angel  
Vidal<sup>\*a</sup>

<sup>a</sup> *Departamento de Química Orgánica, Facultad de Química, Universidad de Murcia,  
Campus de Espinardo, 30100, Murcia, Spain*

<sup>b</sup> *Servicio Universitario de Instrumentación Científica, Universidad de Murcia, Campus de  
Espinardo, 30100, Murcia, Spain*

## Table of Contents

|                                                                                                                                                                                                        |        |
|--------------------------------------------------------------------------------------------------------------------------------------------------------------------------------------------------------|--------|
| <b>Figure S1</b> ORTEP representation of the crystal structure of <b>4a</b>                                                                                                                            | S2     |
| <b>Figure S2</b> ORTEP representation of the crystal structure of <b>12</b>                                                                                                                            | S3     |
| <b>Figure S3</b> Dimer formation via C1—H1...N2 hydrogen bonds in compound <b>12</b>                                                                                                                   | S4     |
| <b>Figure S4</b> Ribbons formation via C24—H24...O1 hydrogen bonds in compound <b>12</b>                                                                                                               | S5     |
| Copy of <sup>1</sup> H and <sup>13</sup> C NMR Spectra of Compounds <b>2</b> , <b>4</b> , <b>5</b> , <b>12</b> , <b>14</b> and <b>15</b> . Copy of <sup>31</sup> P NMR Spectra of Compounds <b>2</b> . | S6-S75 |

**Figure S1:** ORTEP representation of the crystal structure of **4a**

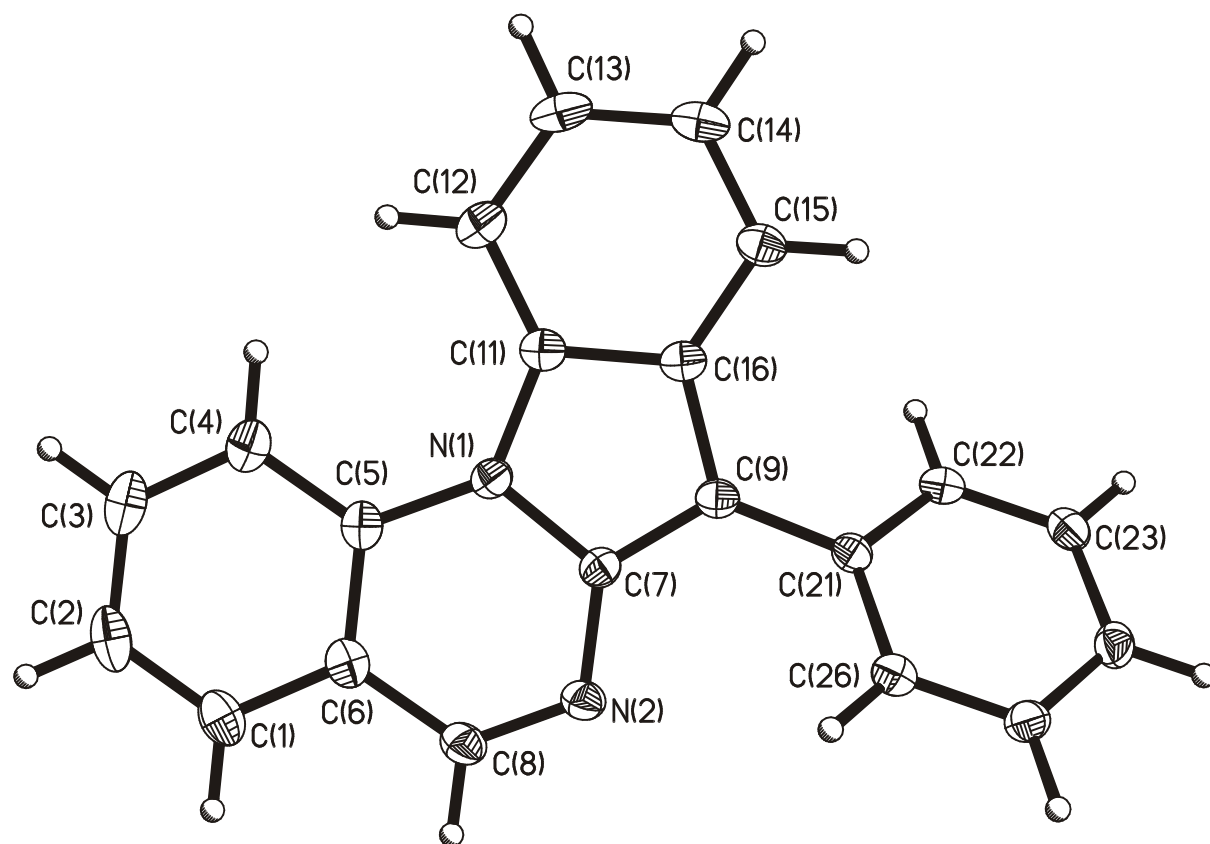

**Figure S2:** ORTEP representation of the crystal structure of **12**

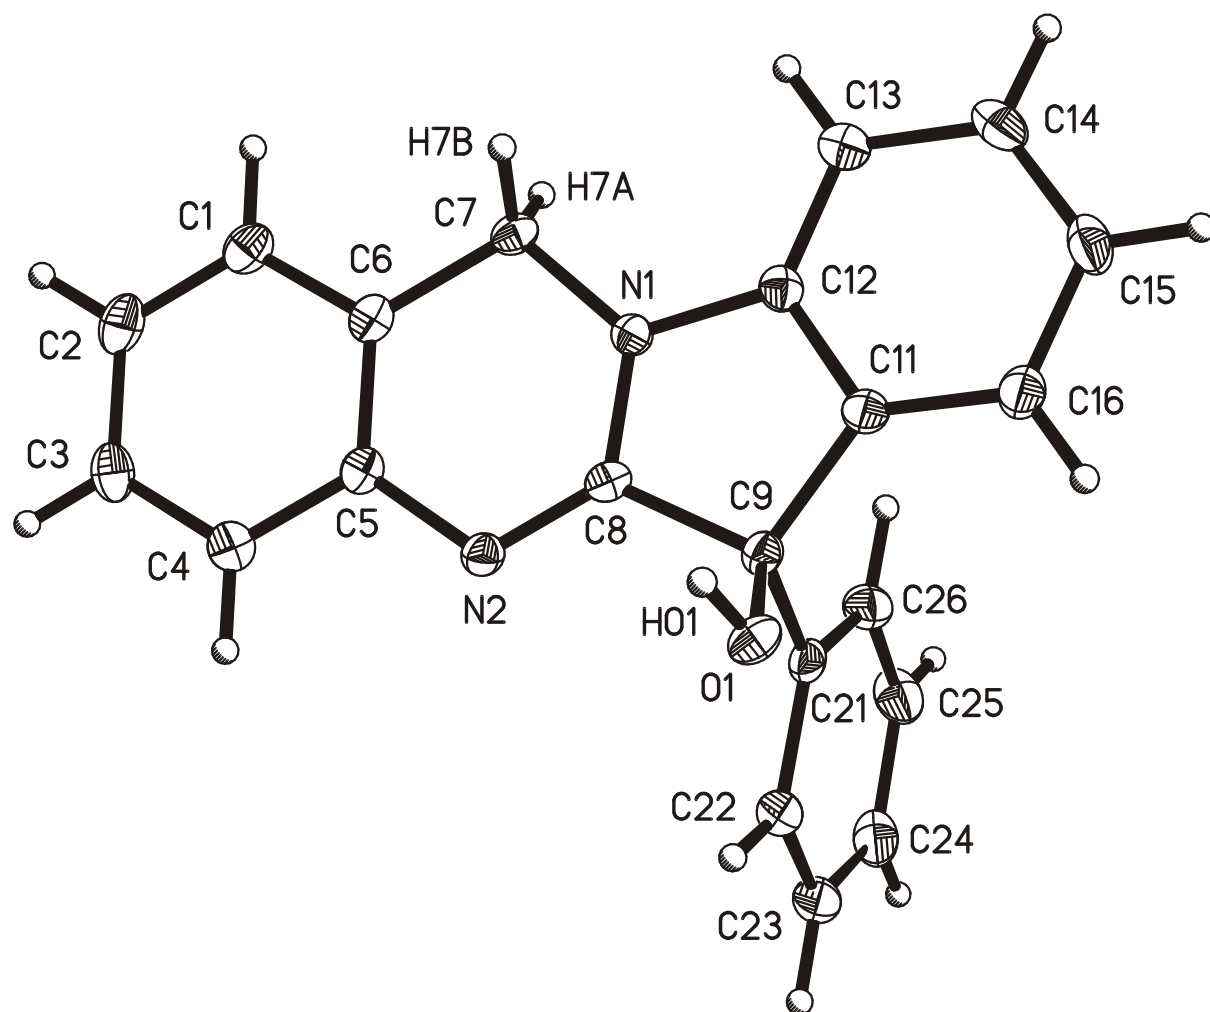

**Figure S3:** Dimer formation via O1—H1...N2 hydrogen bonds in compound **12** (some hydrogen atoms have been omitted for clarity)

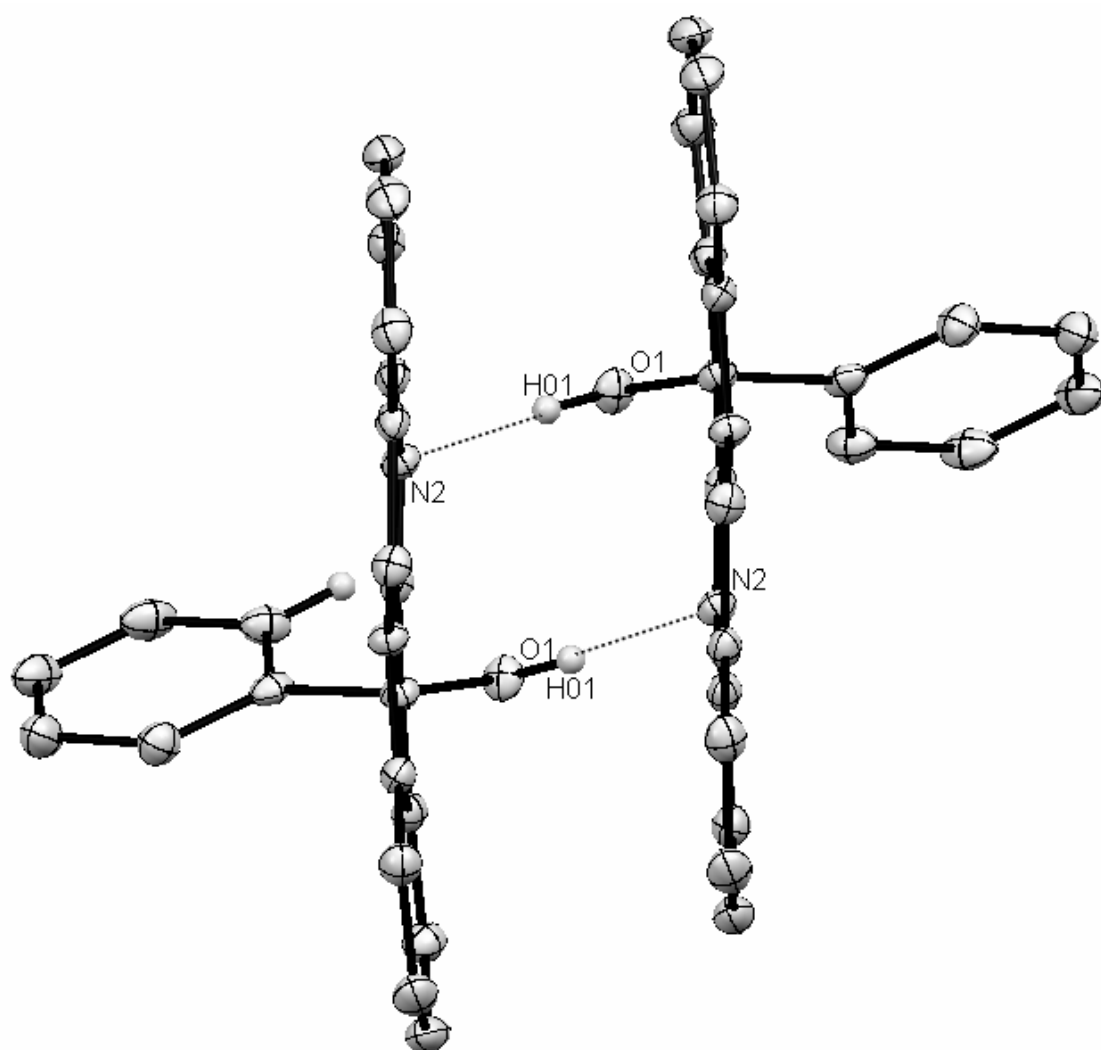



**Figure S4.** Ribbons formation via C24—H24...O1 hydrogen bonds in compound **12** (some hydrogen atoms have been omitted for clarity)

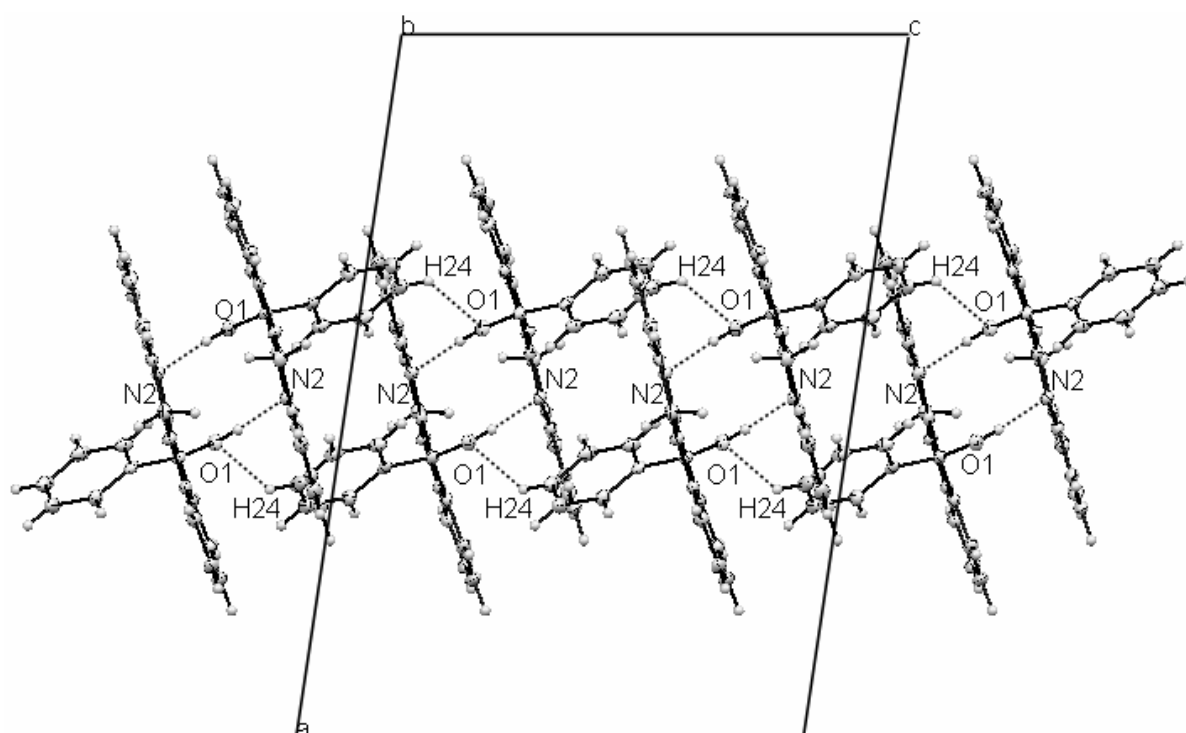

### Copy of $^1\text{H}$ and $^{13}\text{C}$ NMR Spectra of Compounds 2, 4, 5, 12, 14 and 15. Copy of $^{31}\text{P}$ NMR Spectra of Compounds 2.

$^1\text{H}$  NMR of 2a

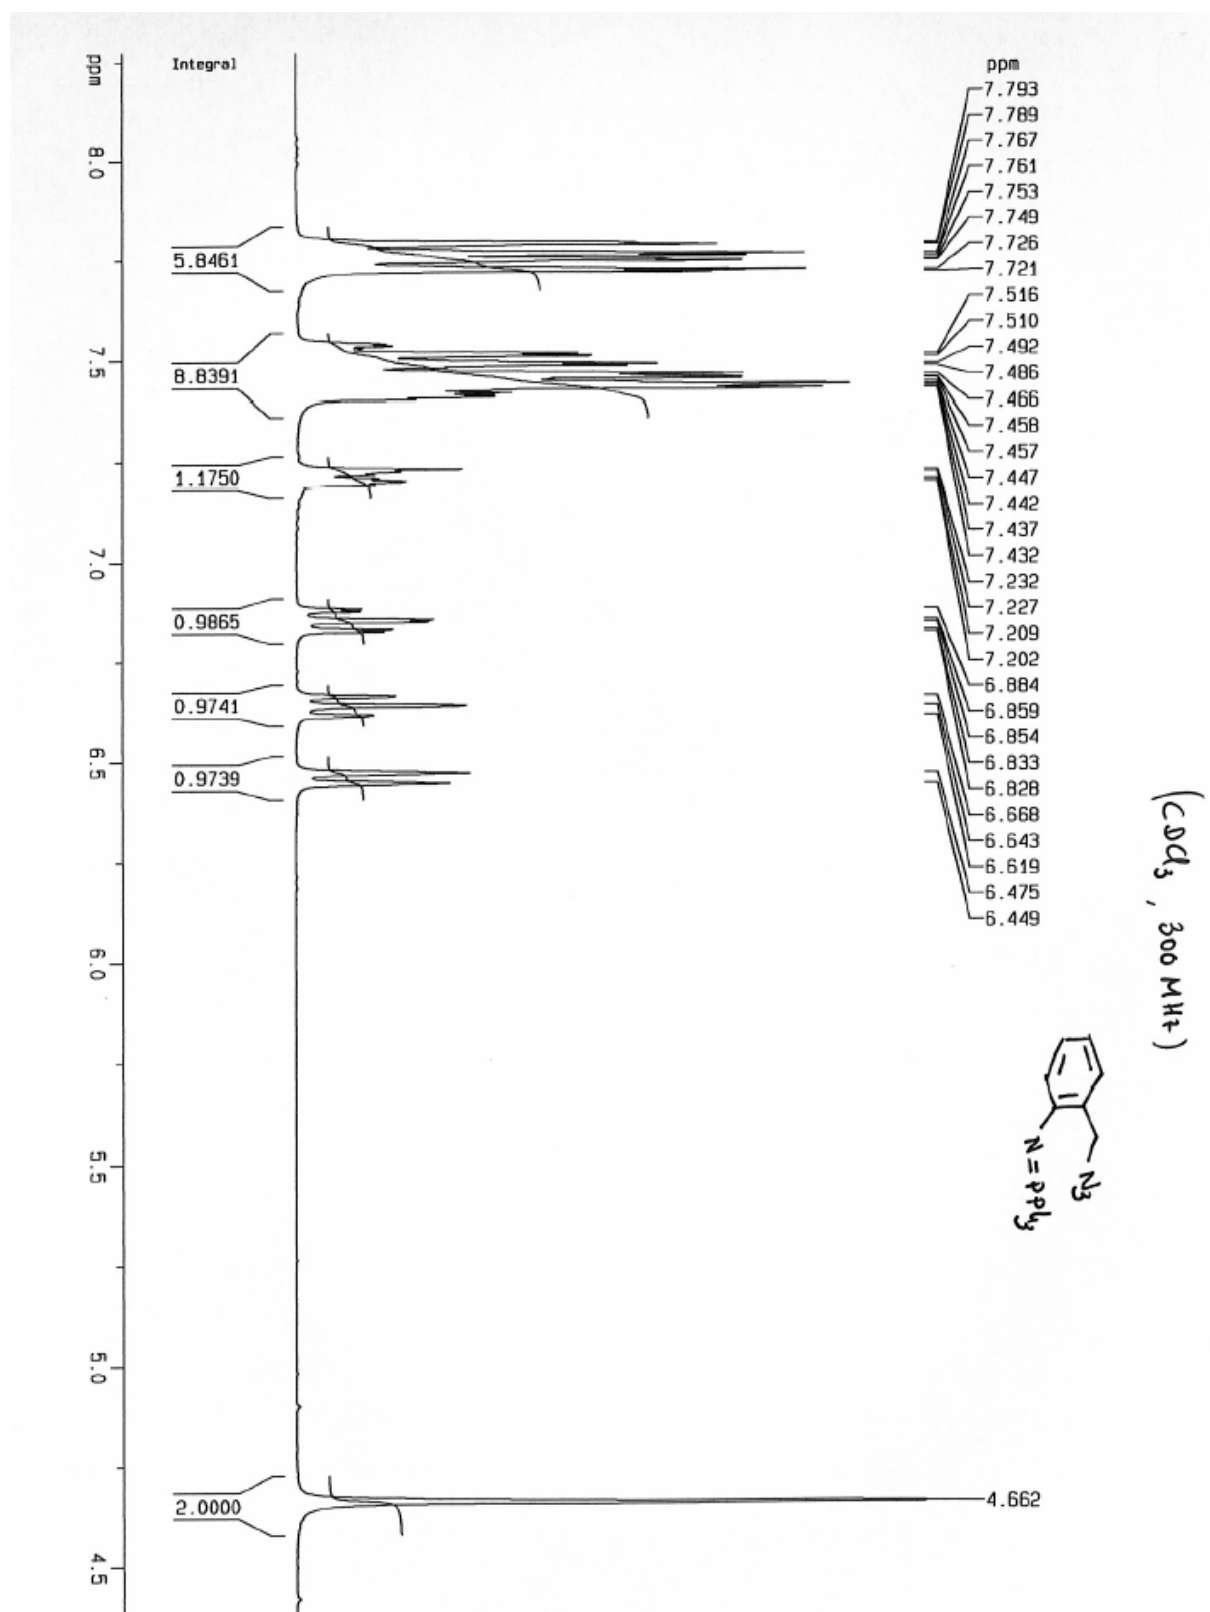

$^{13}\text{C}$  NMR of 2a

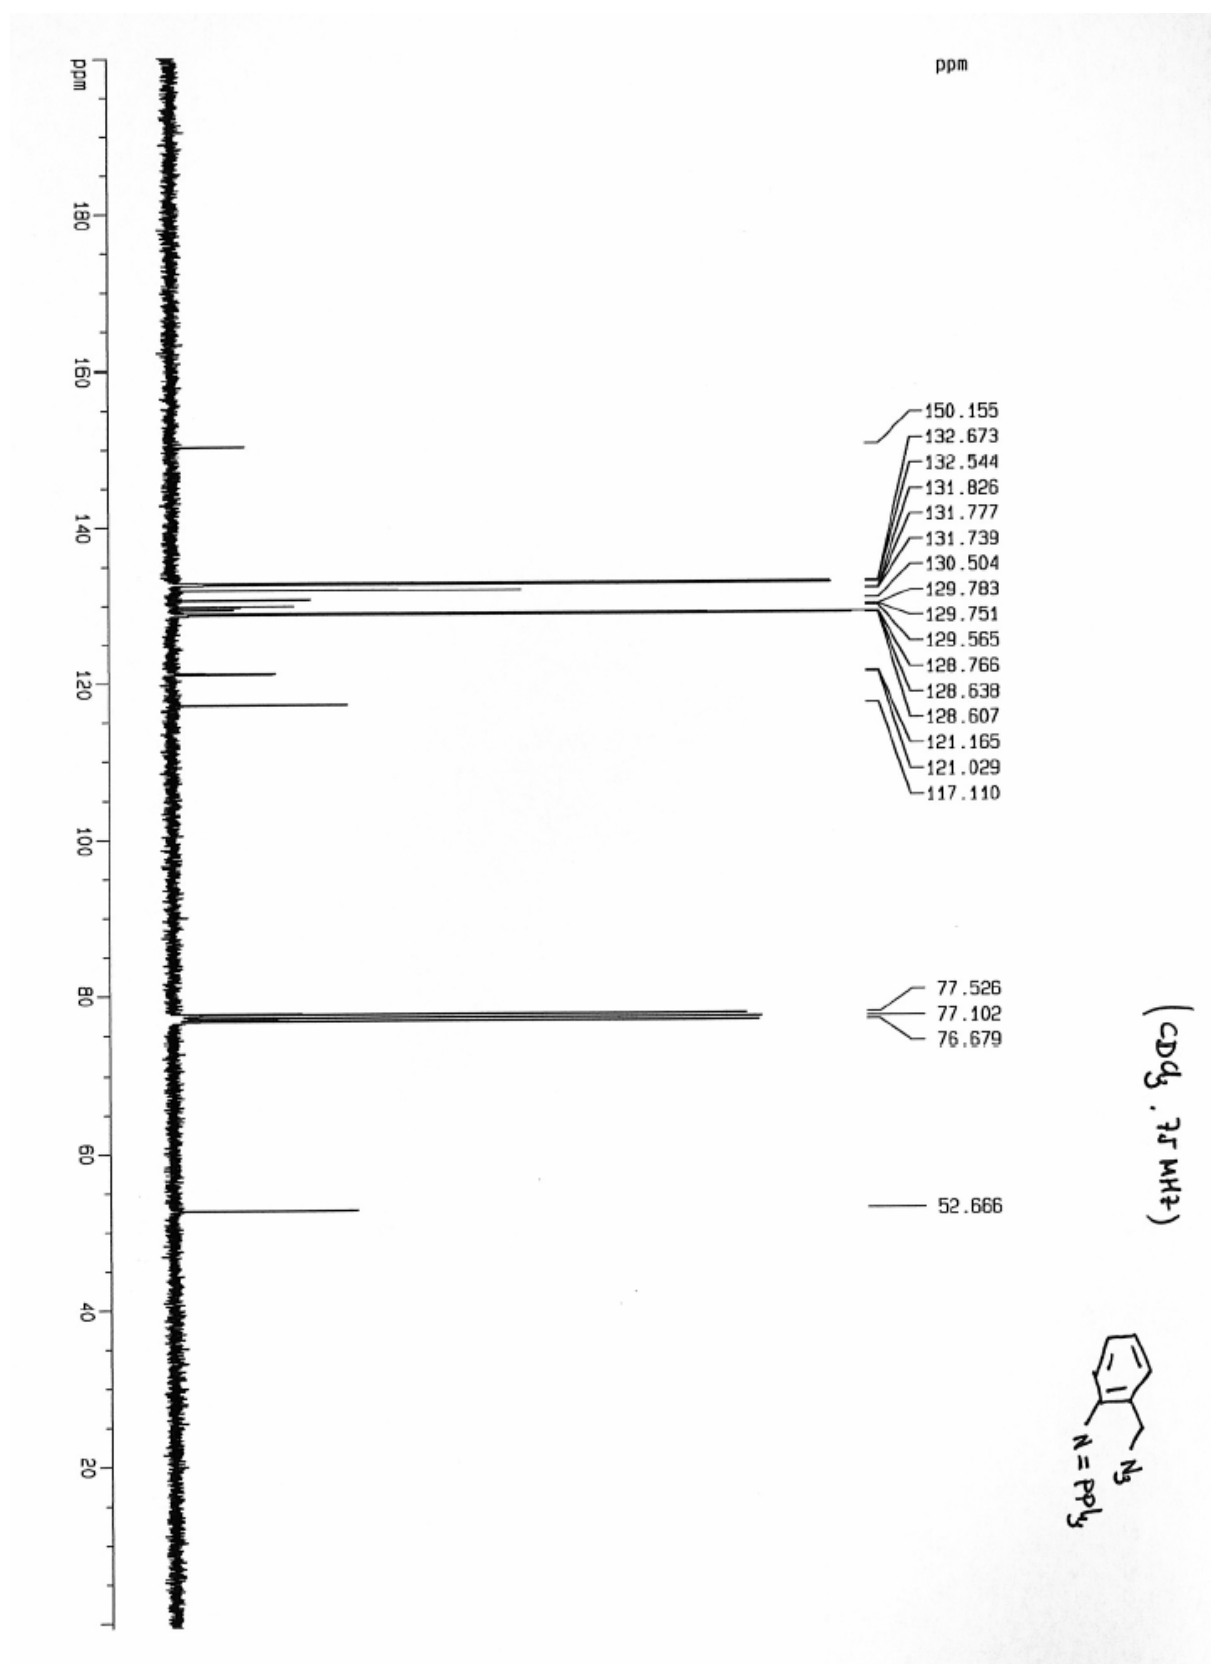

$^{31}\text{P}$  NMR of **2a**

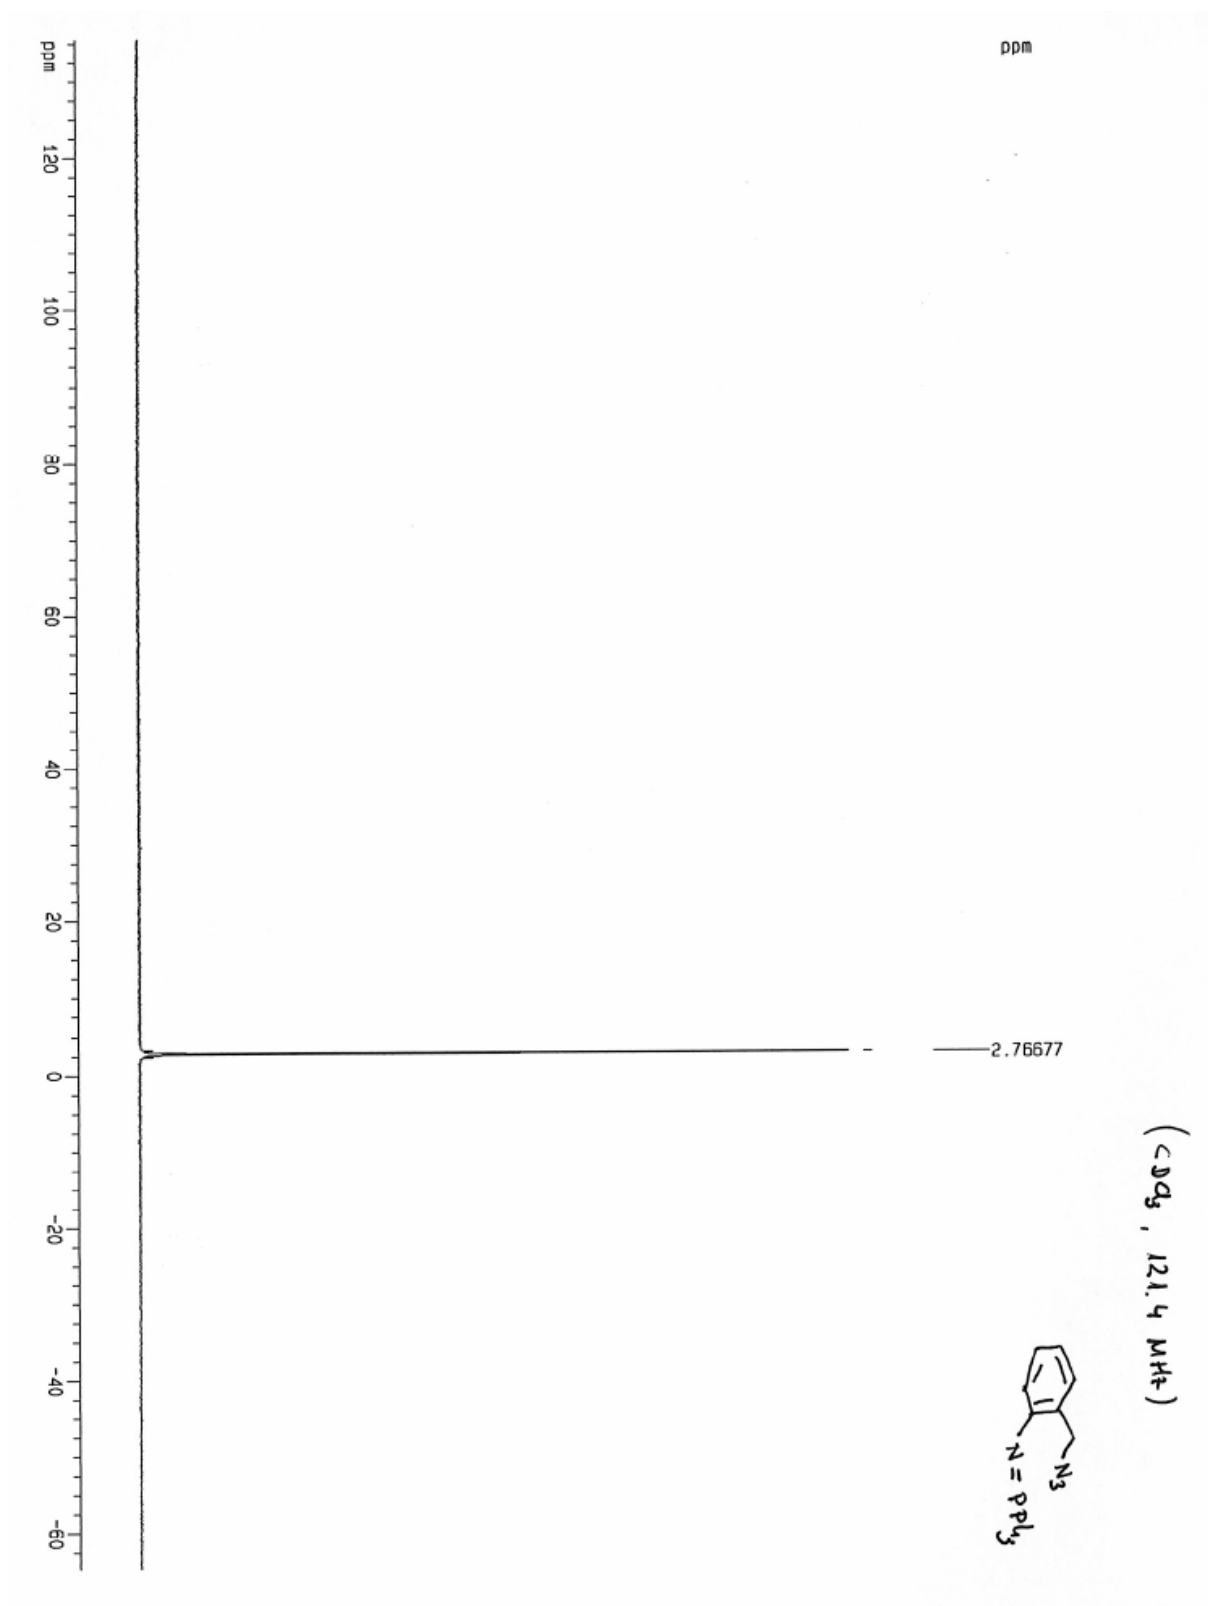

<sup>1</sup>H NMR of **2b**

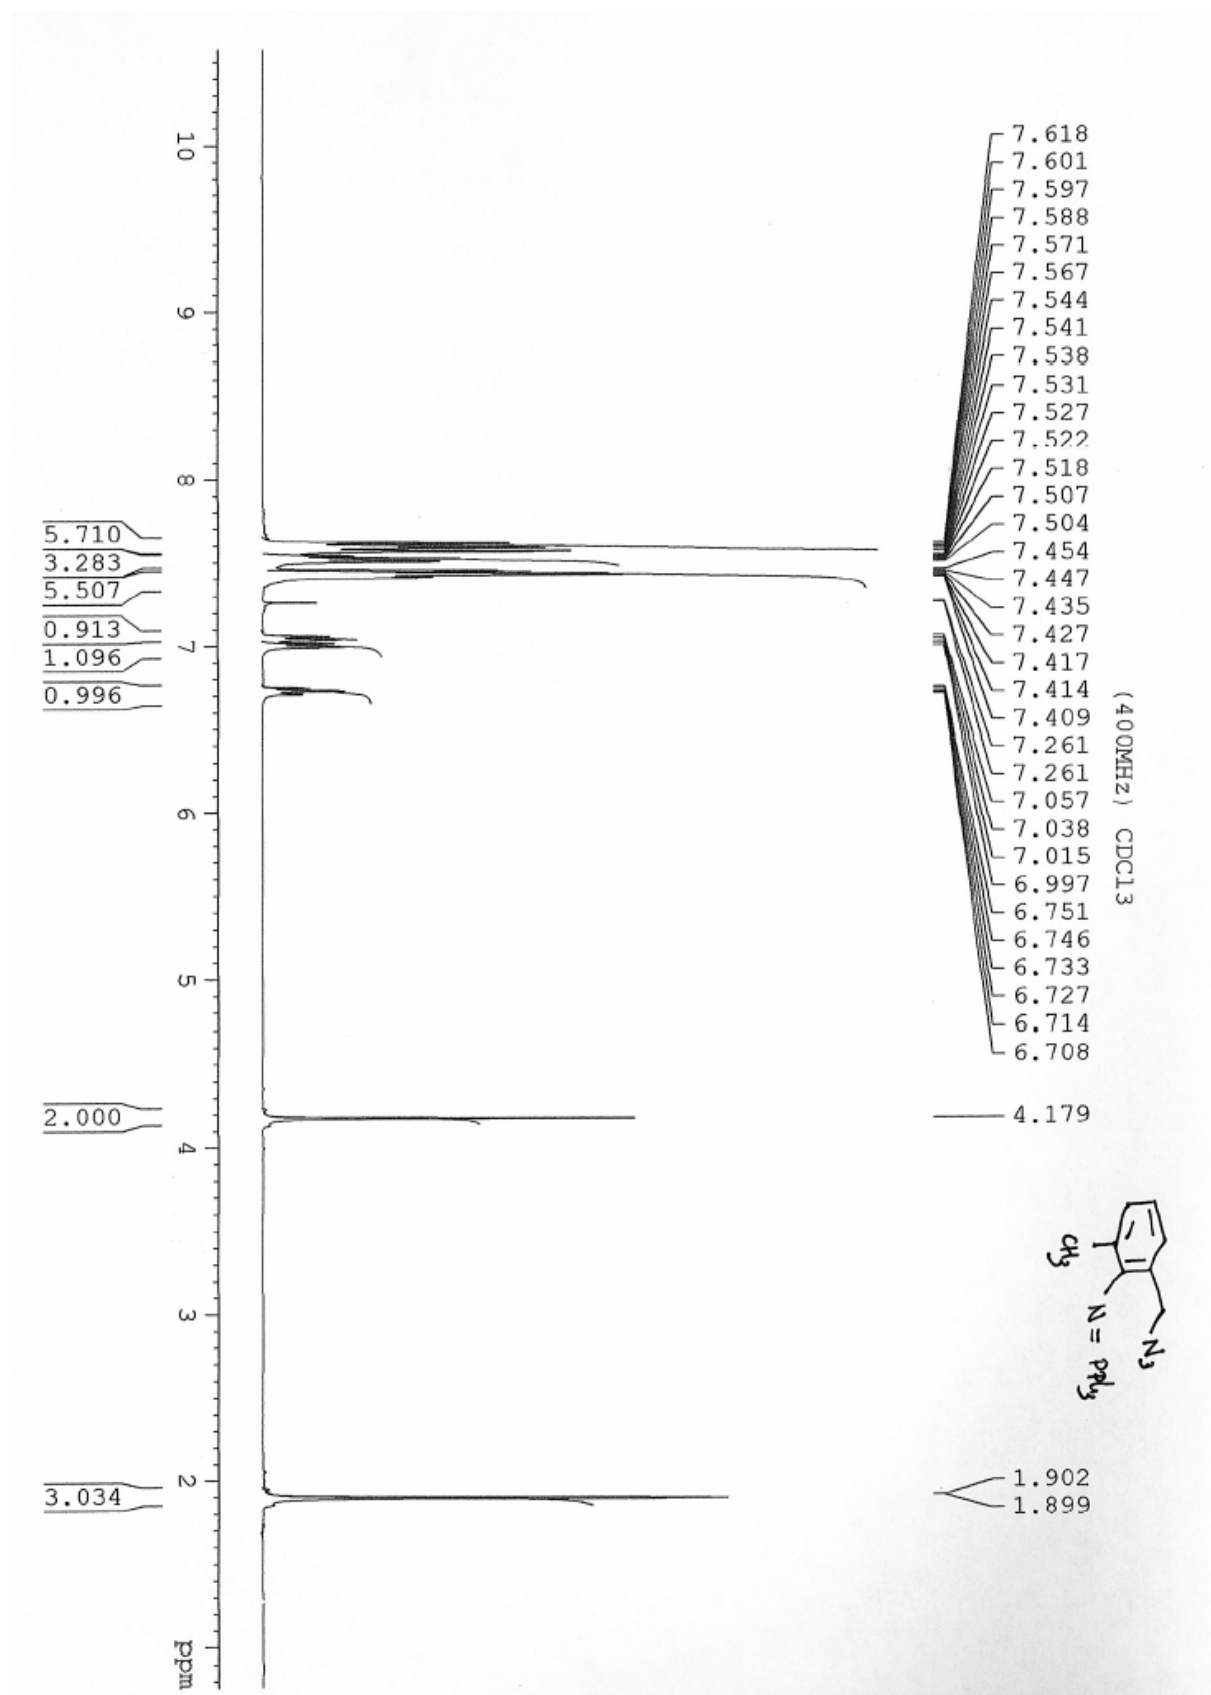

$^{13}\text{C}$  NMR of **2b**

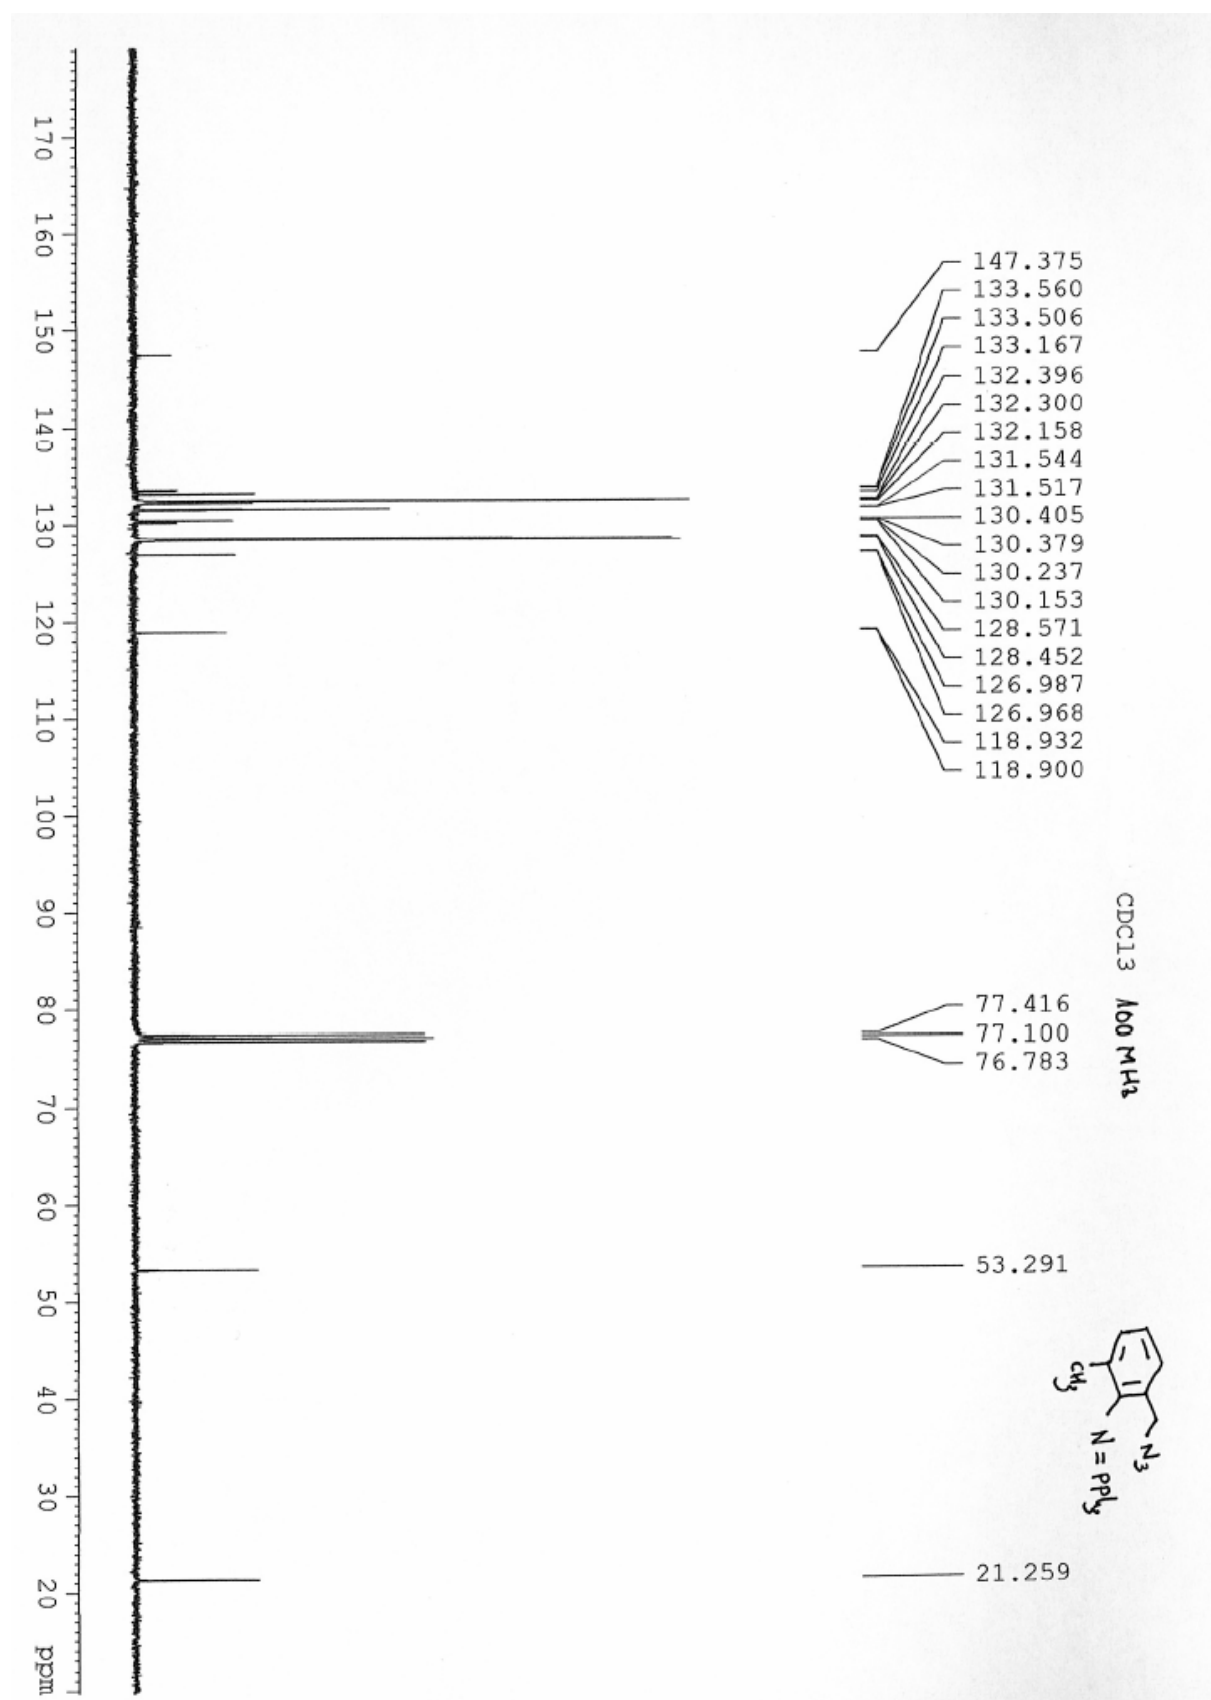

$^{31}\text{P}$  NMR of **2b**

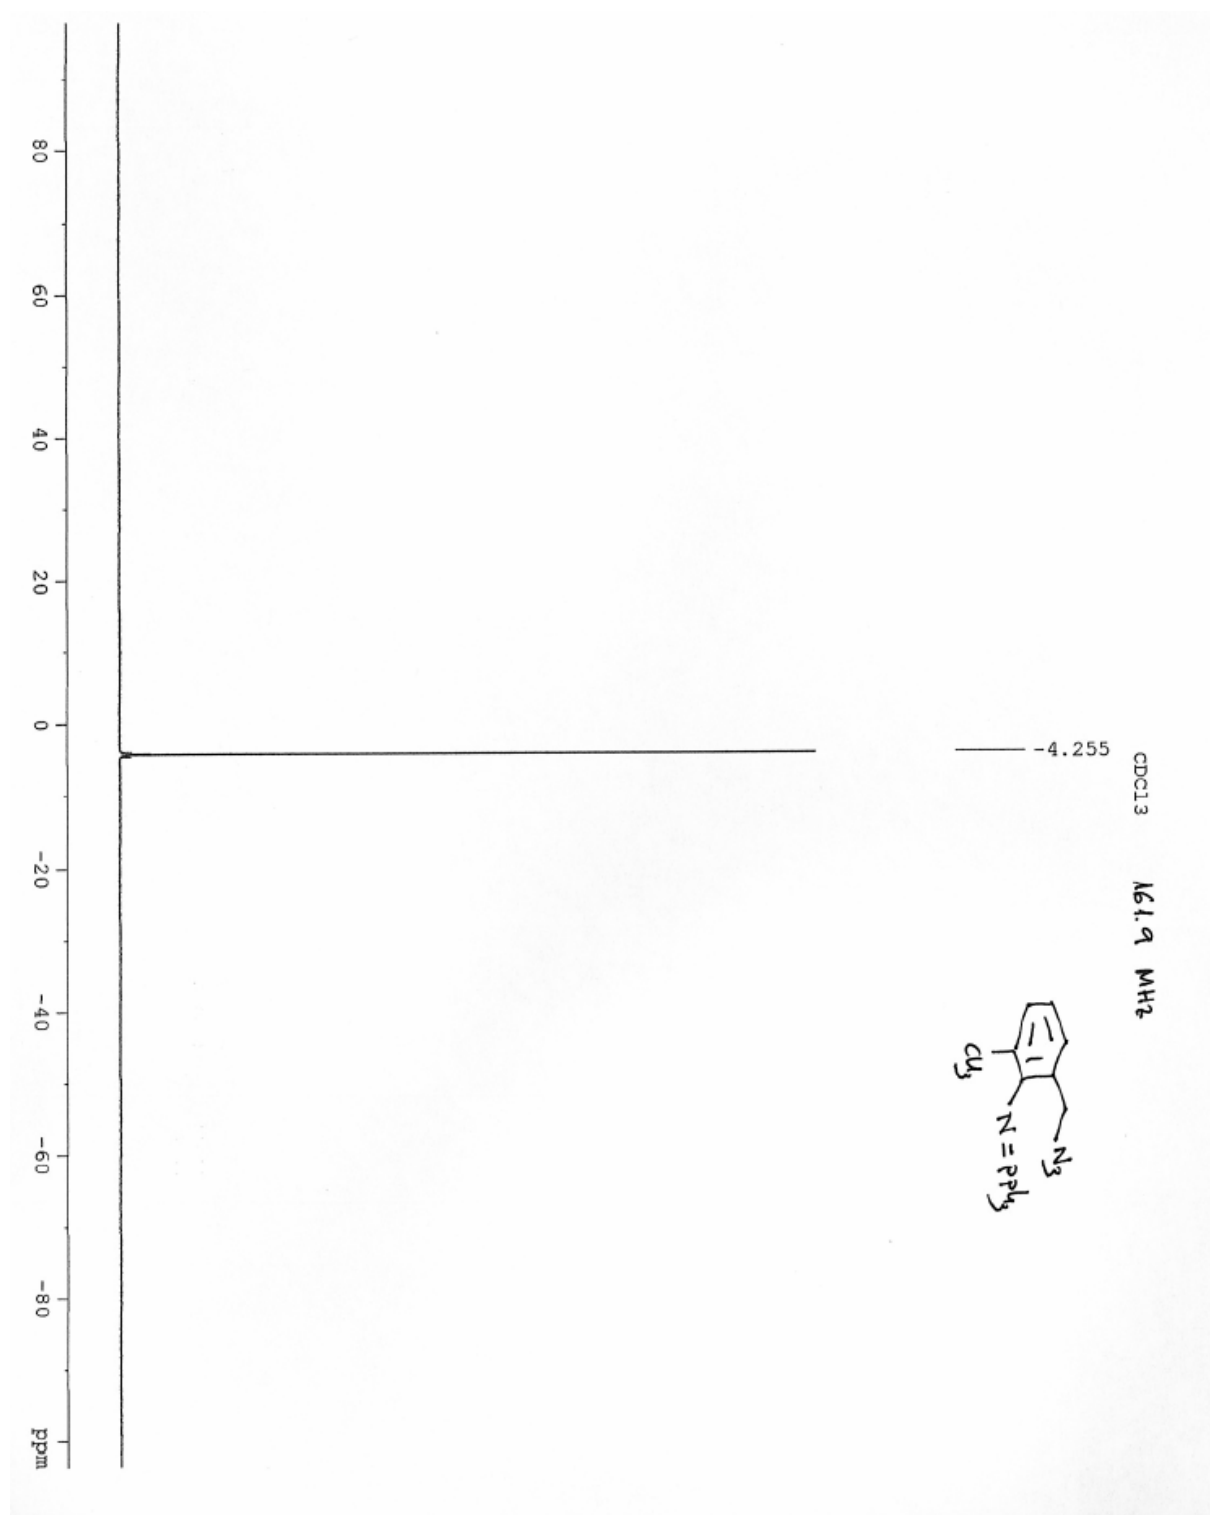

$^1\text{H}$  NMR of **2c**

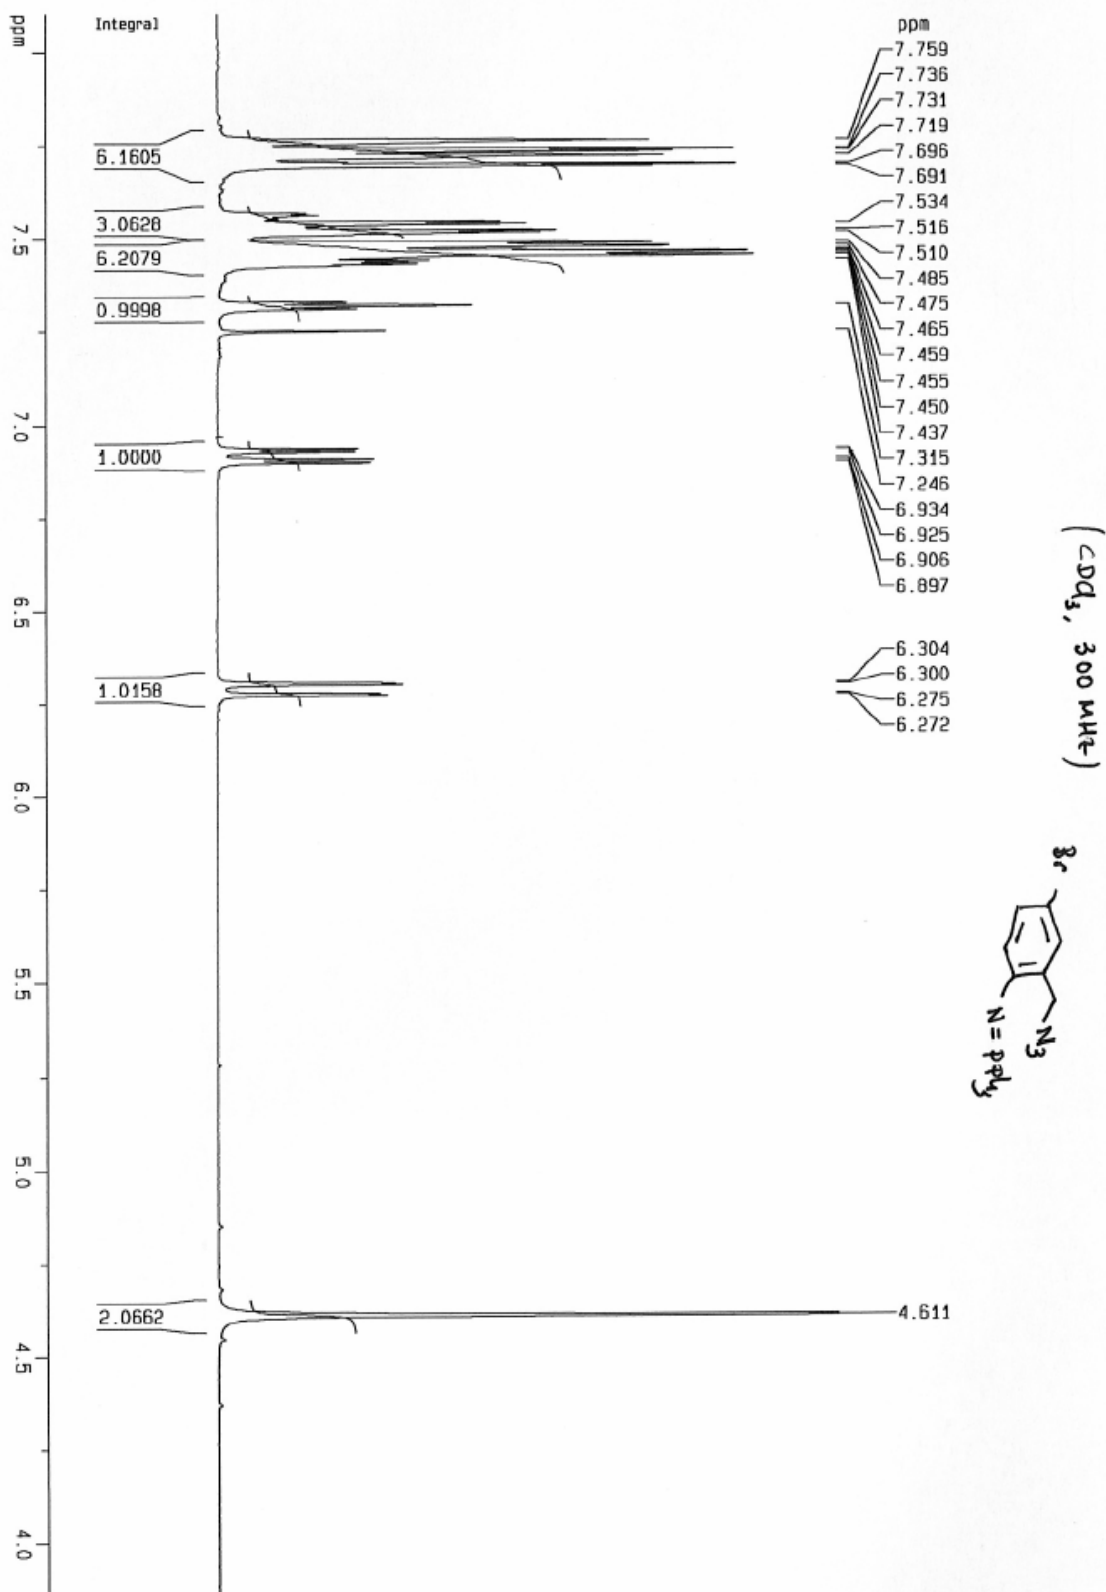



$^{13}\text{C}$  NMR of 2c

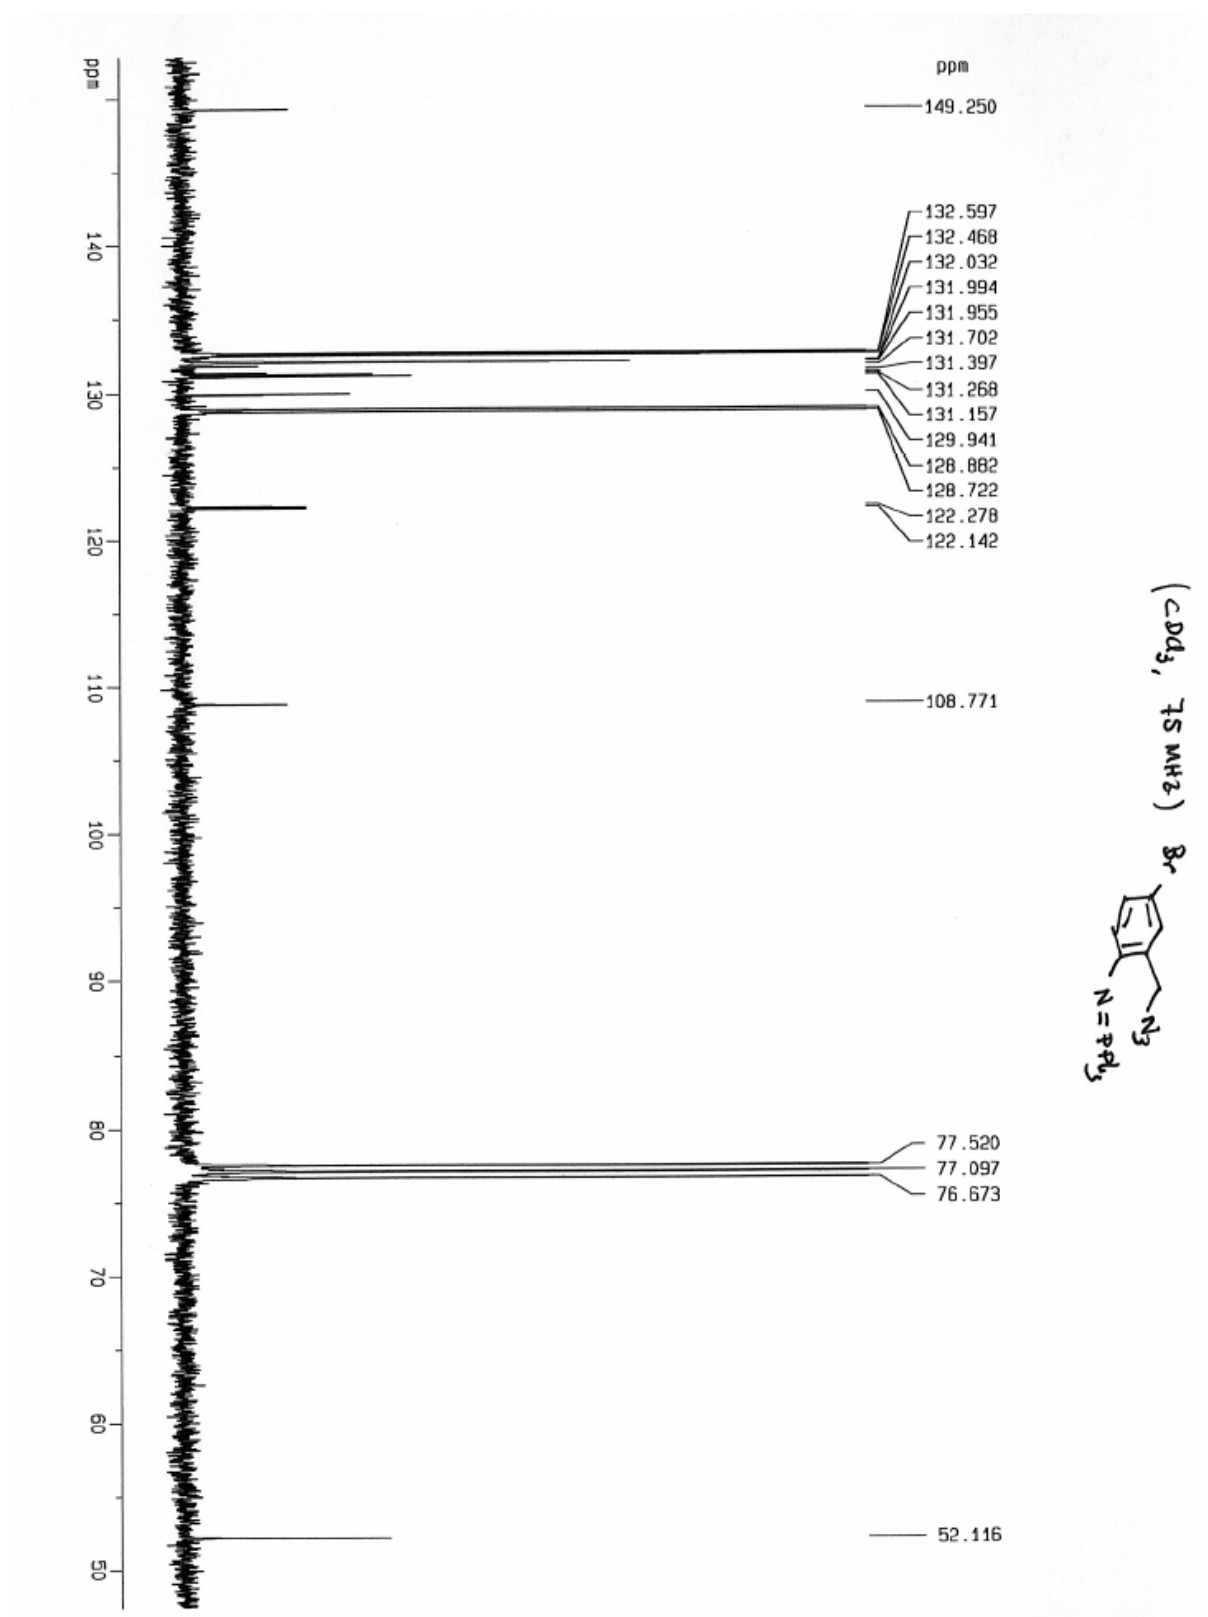

$^{31}\text{P}$  NMR of **2c**

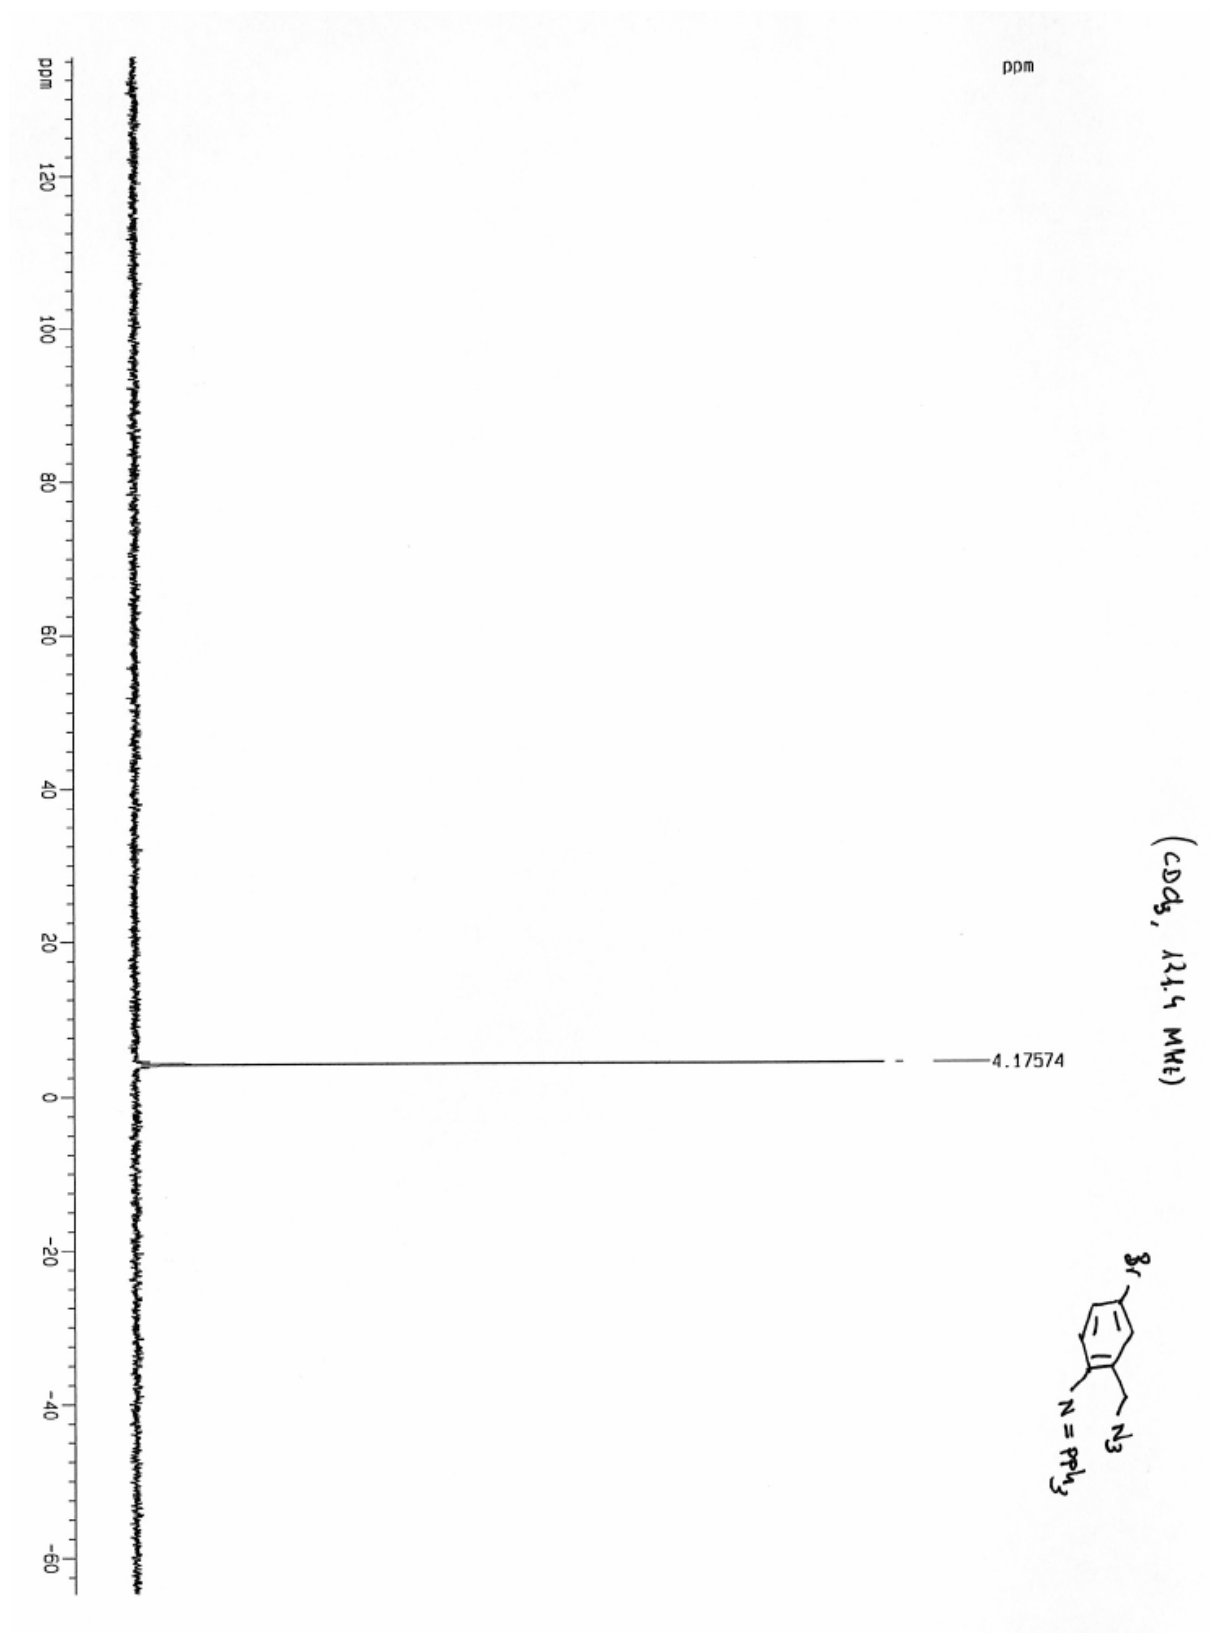

### <sup>1</sup>H NMR of 2d

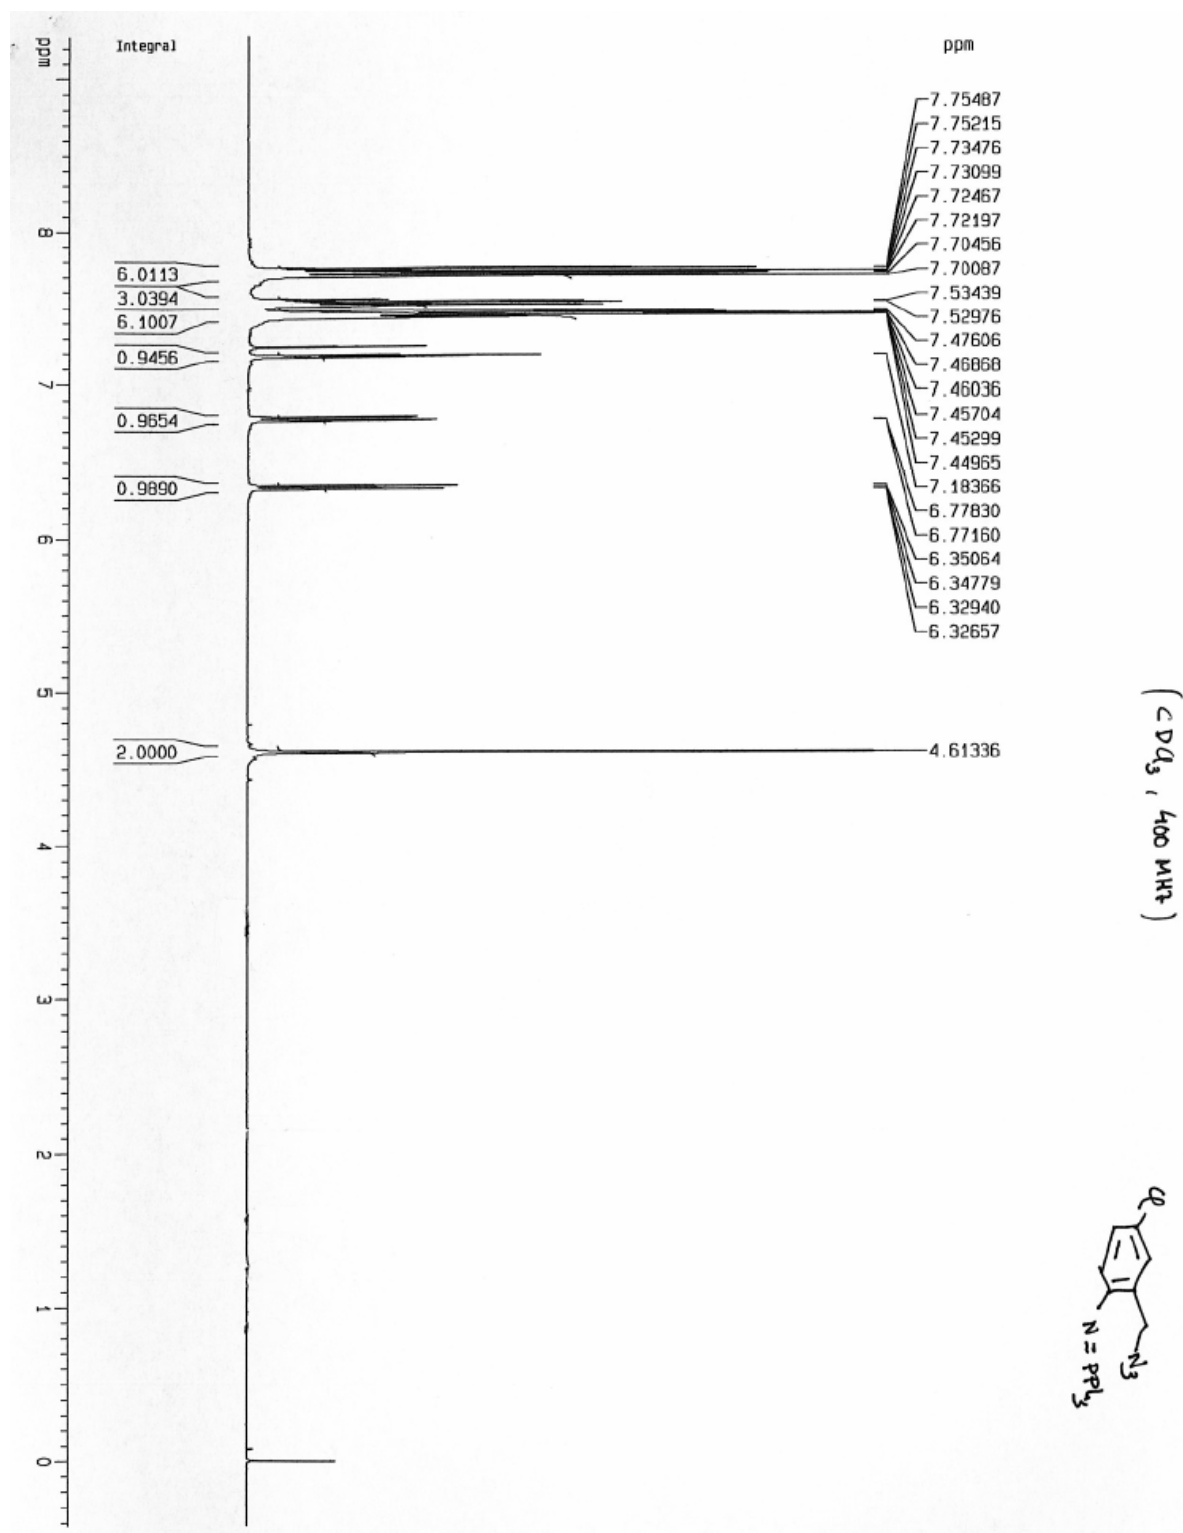

$^{13}\text{C}$  NMR of **2d**

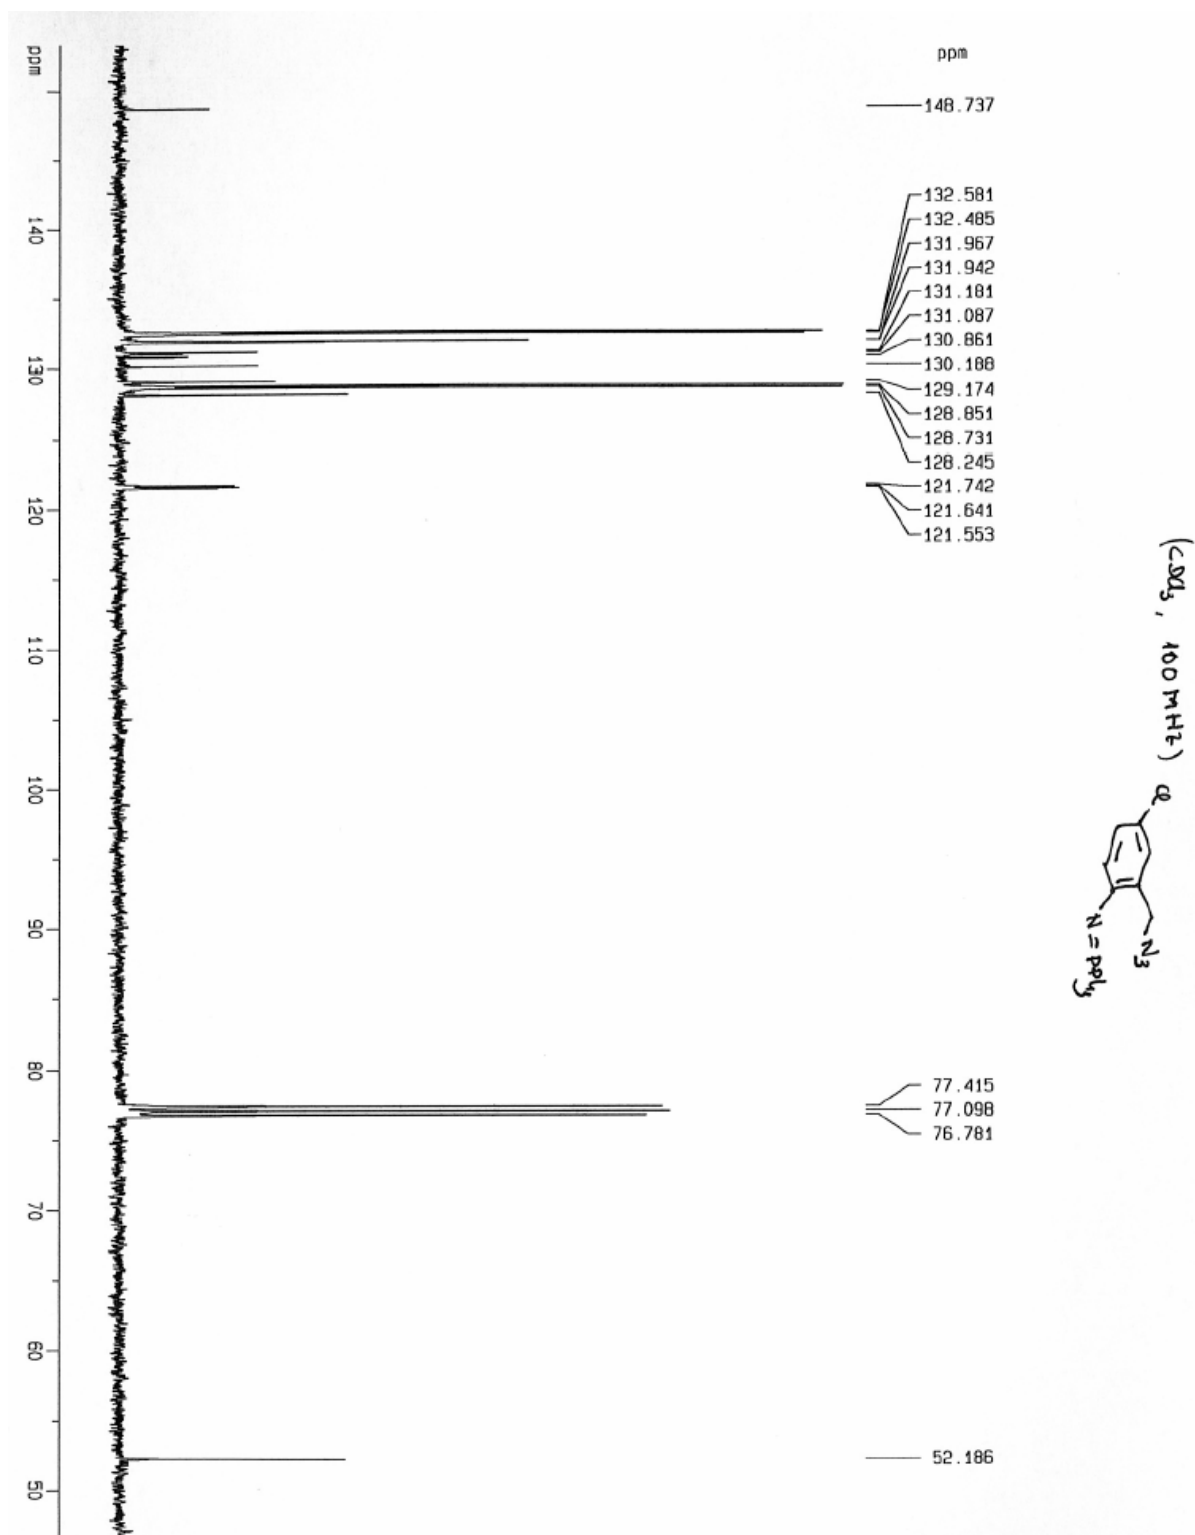

$^{31}\text{P}$  NMR of **2d**

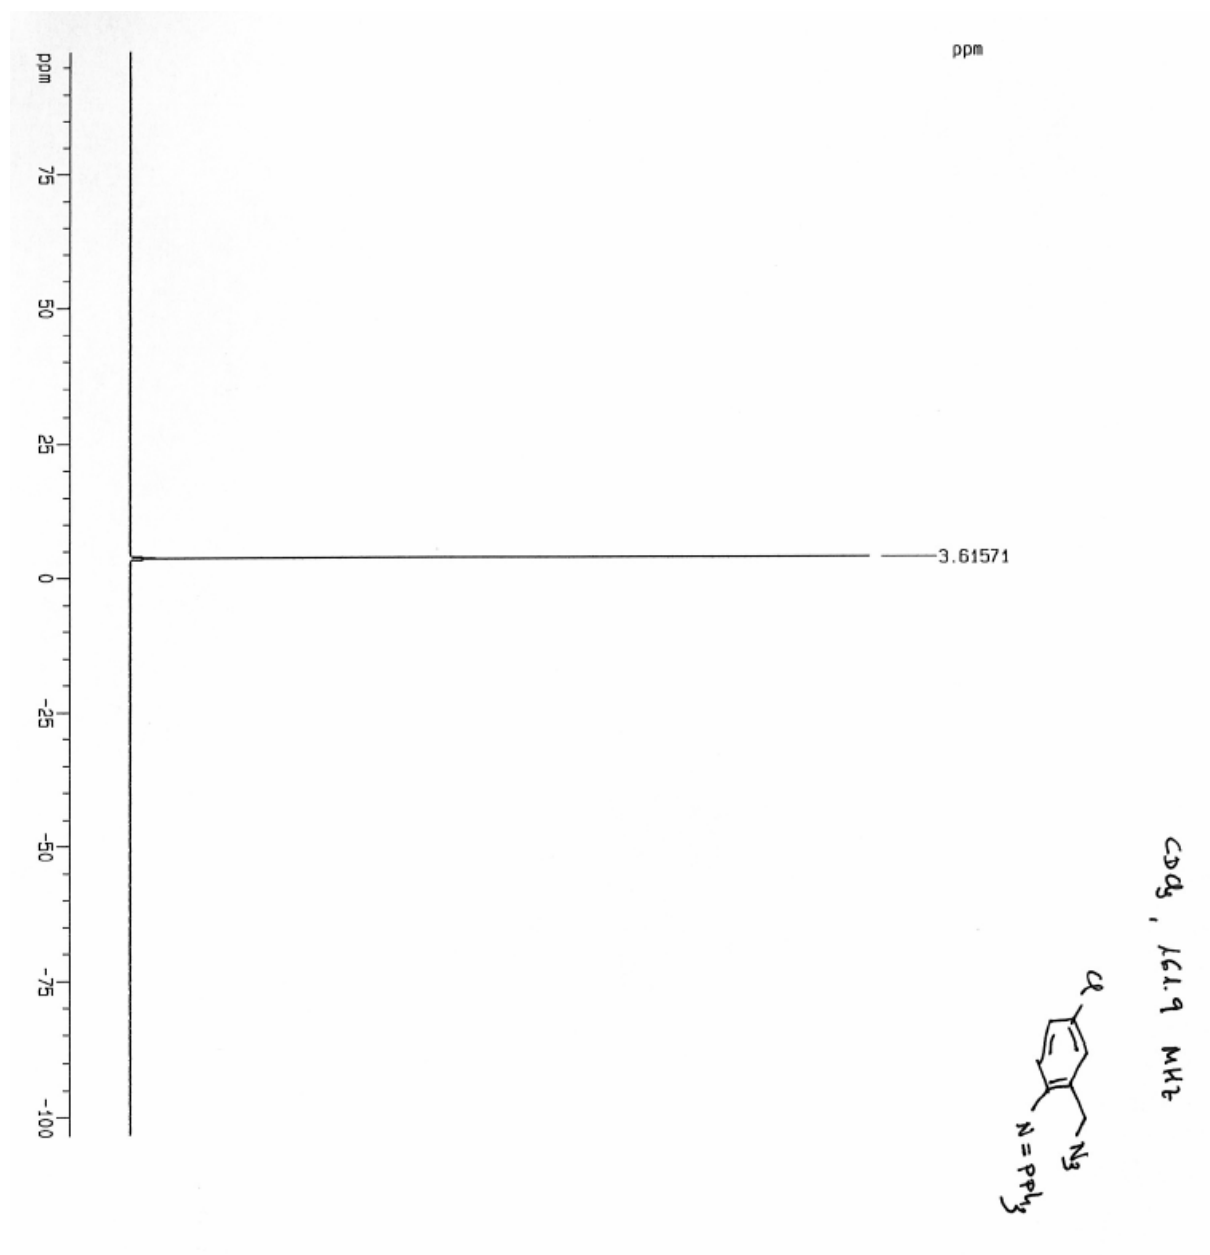

<sup>1</sup>H NMR of 2e

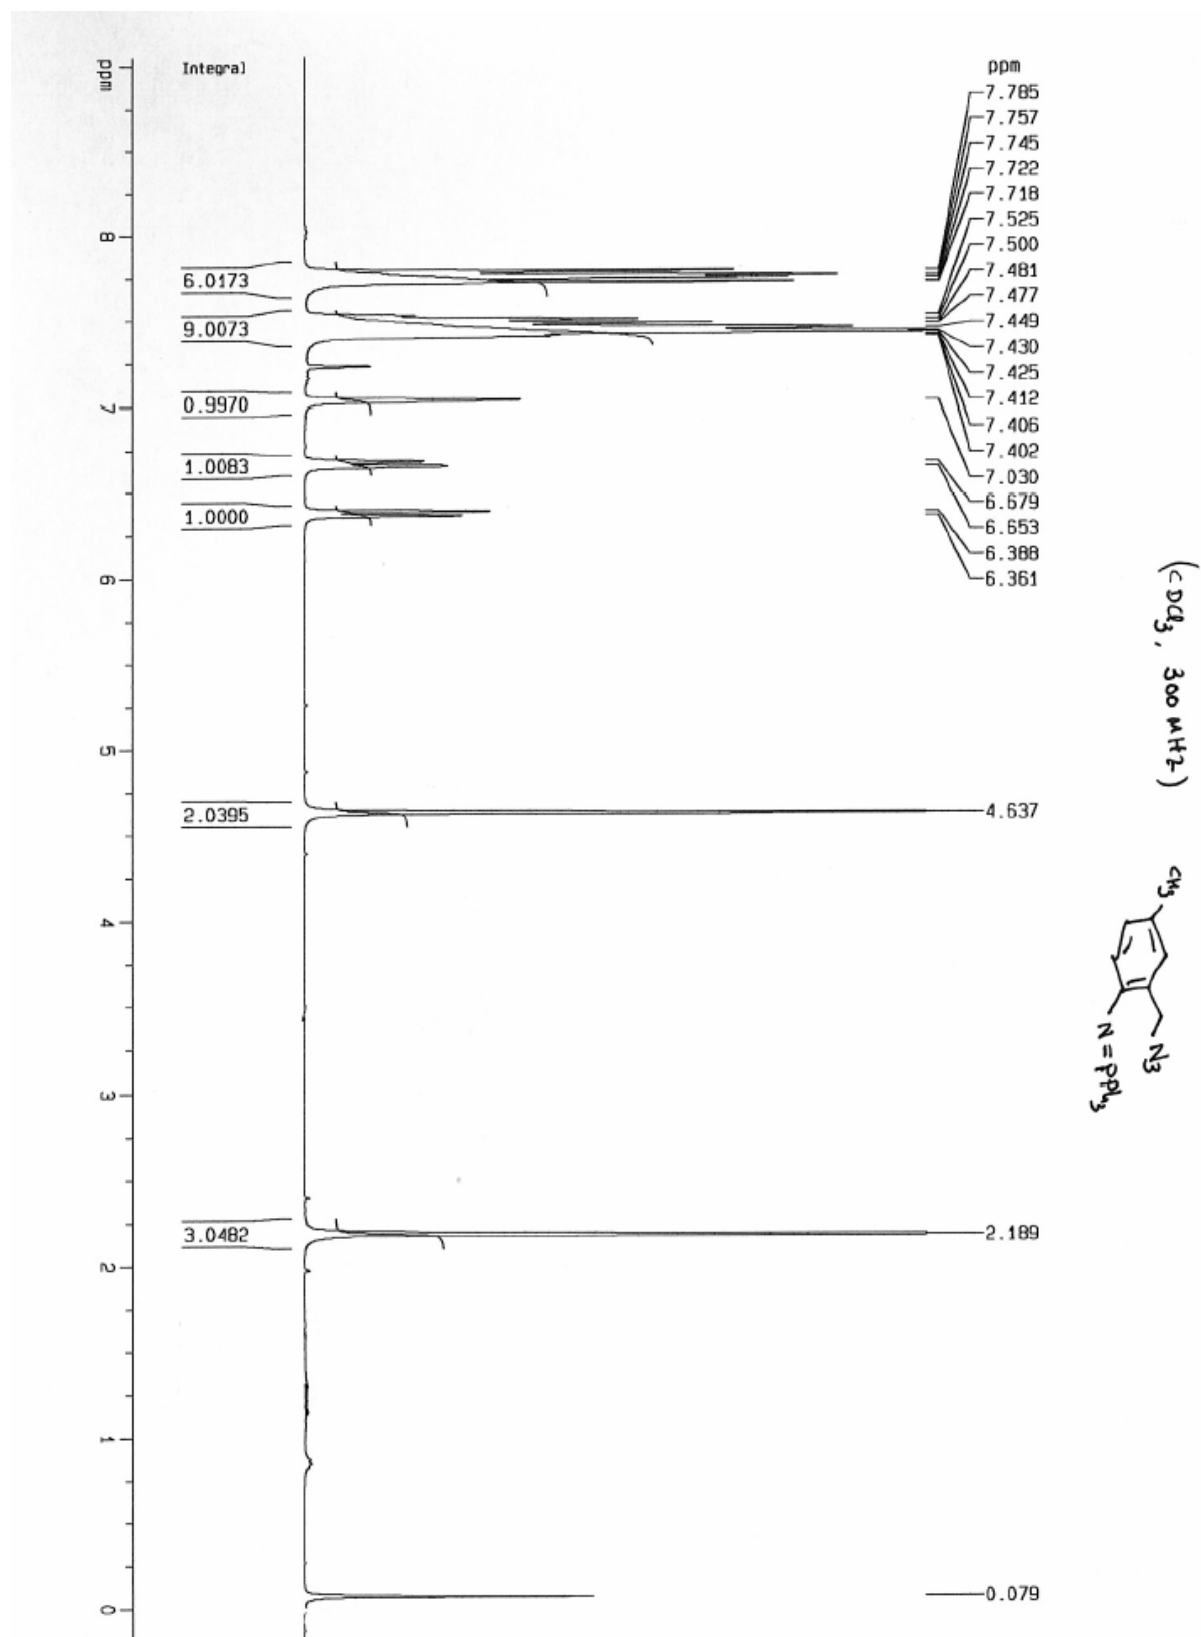

$^{13}\text{C}$  NMR of 2e

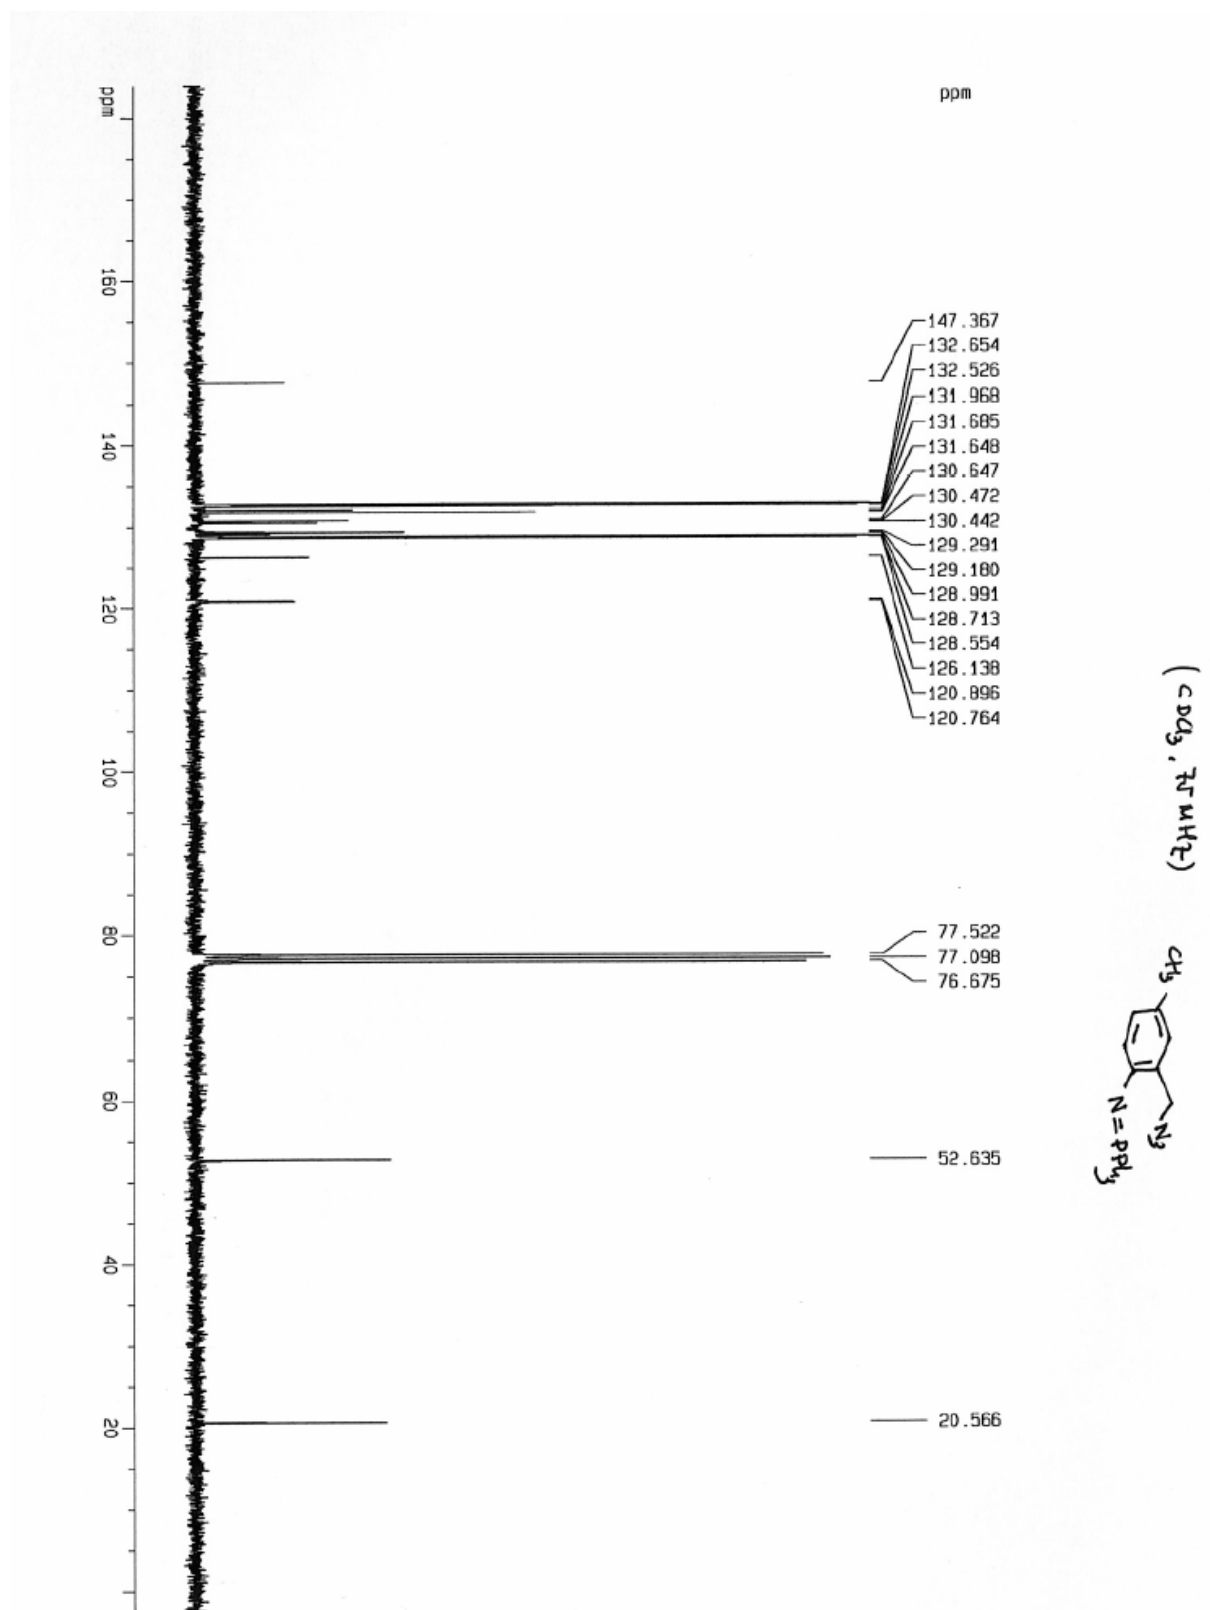

$^{31}\text{P}$  NMR of **2e**

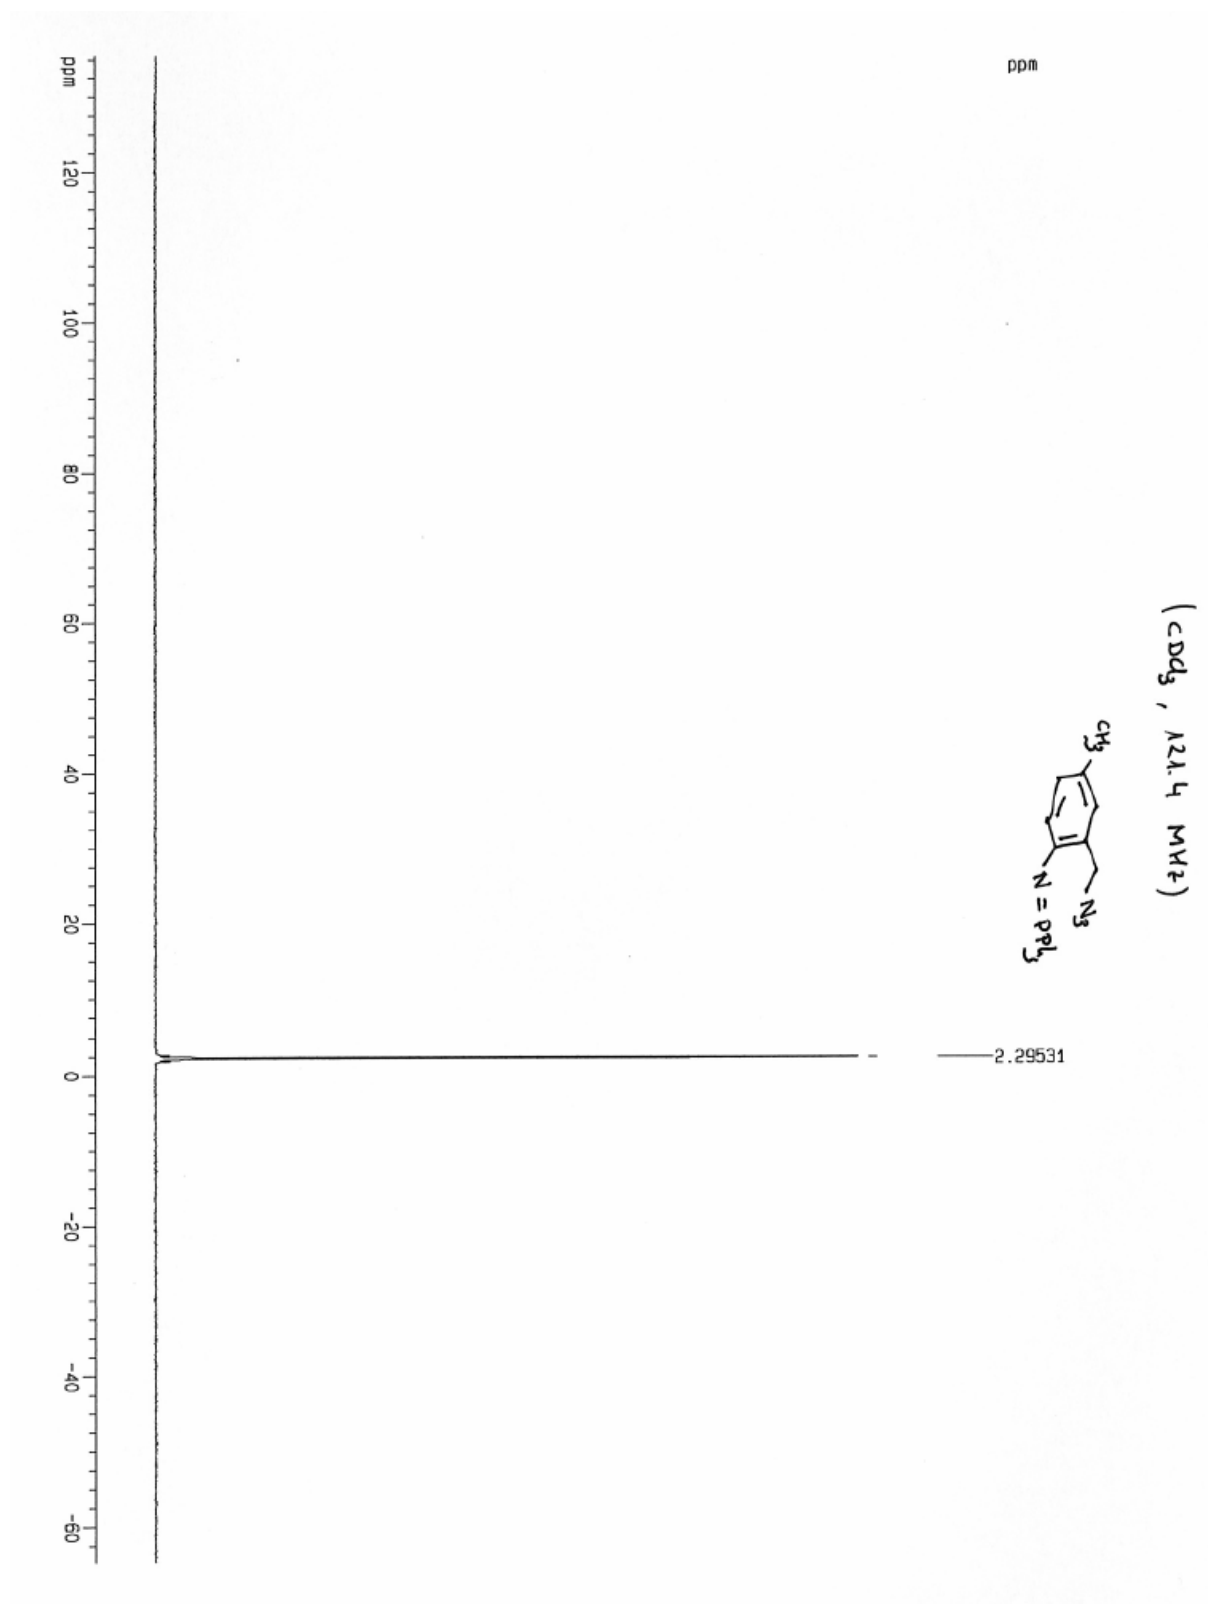



$^1\text{H}$  NMR of **2f**

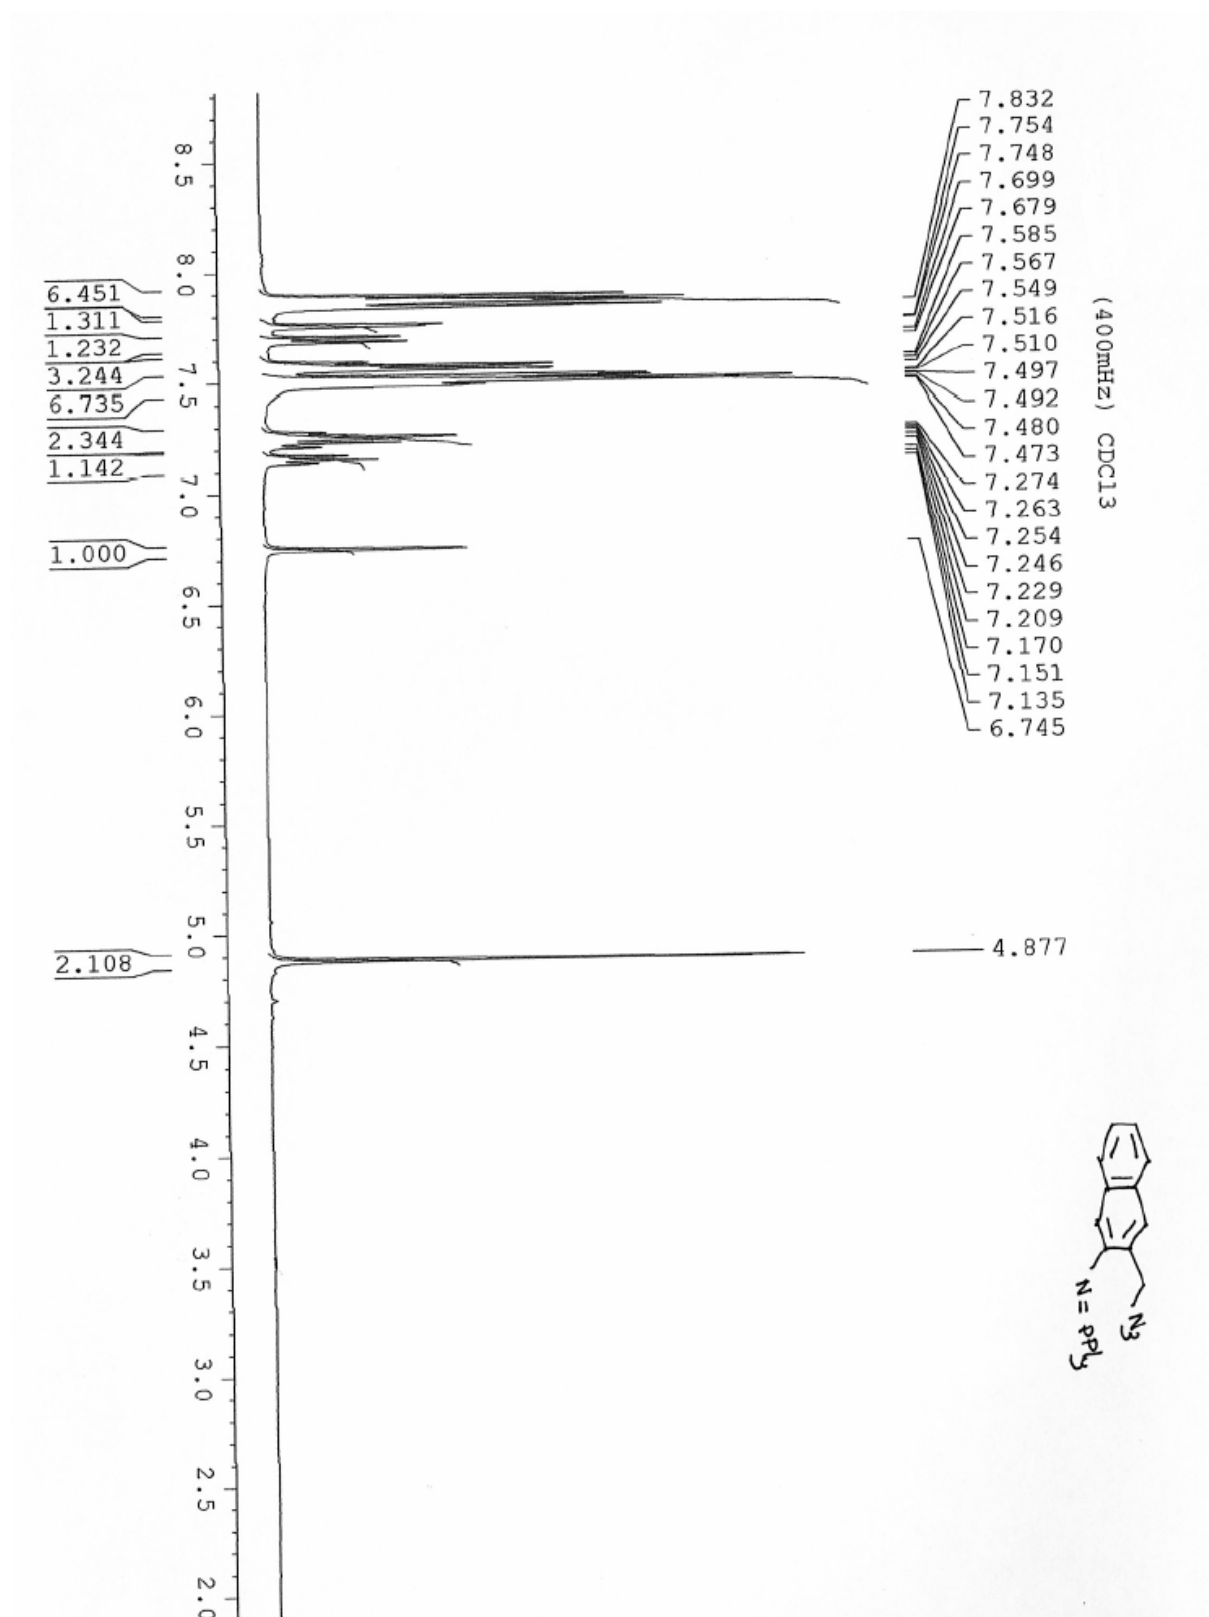

$^{13}\text{C}$  NMR of **2f**

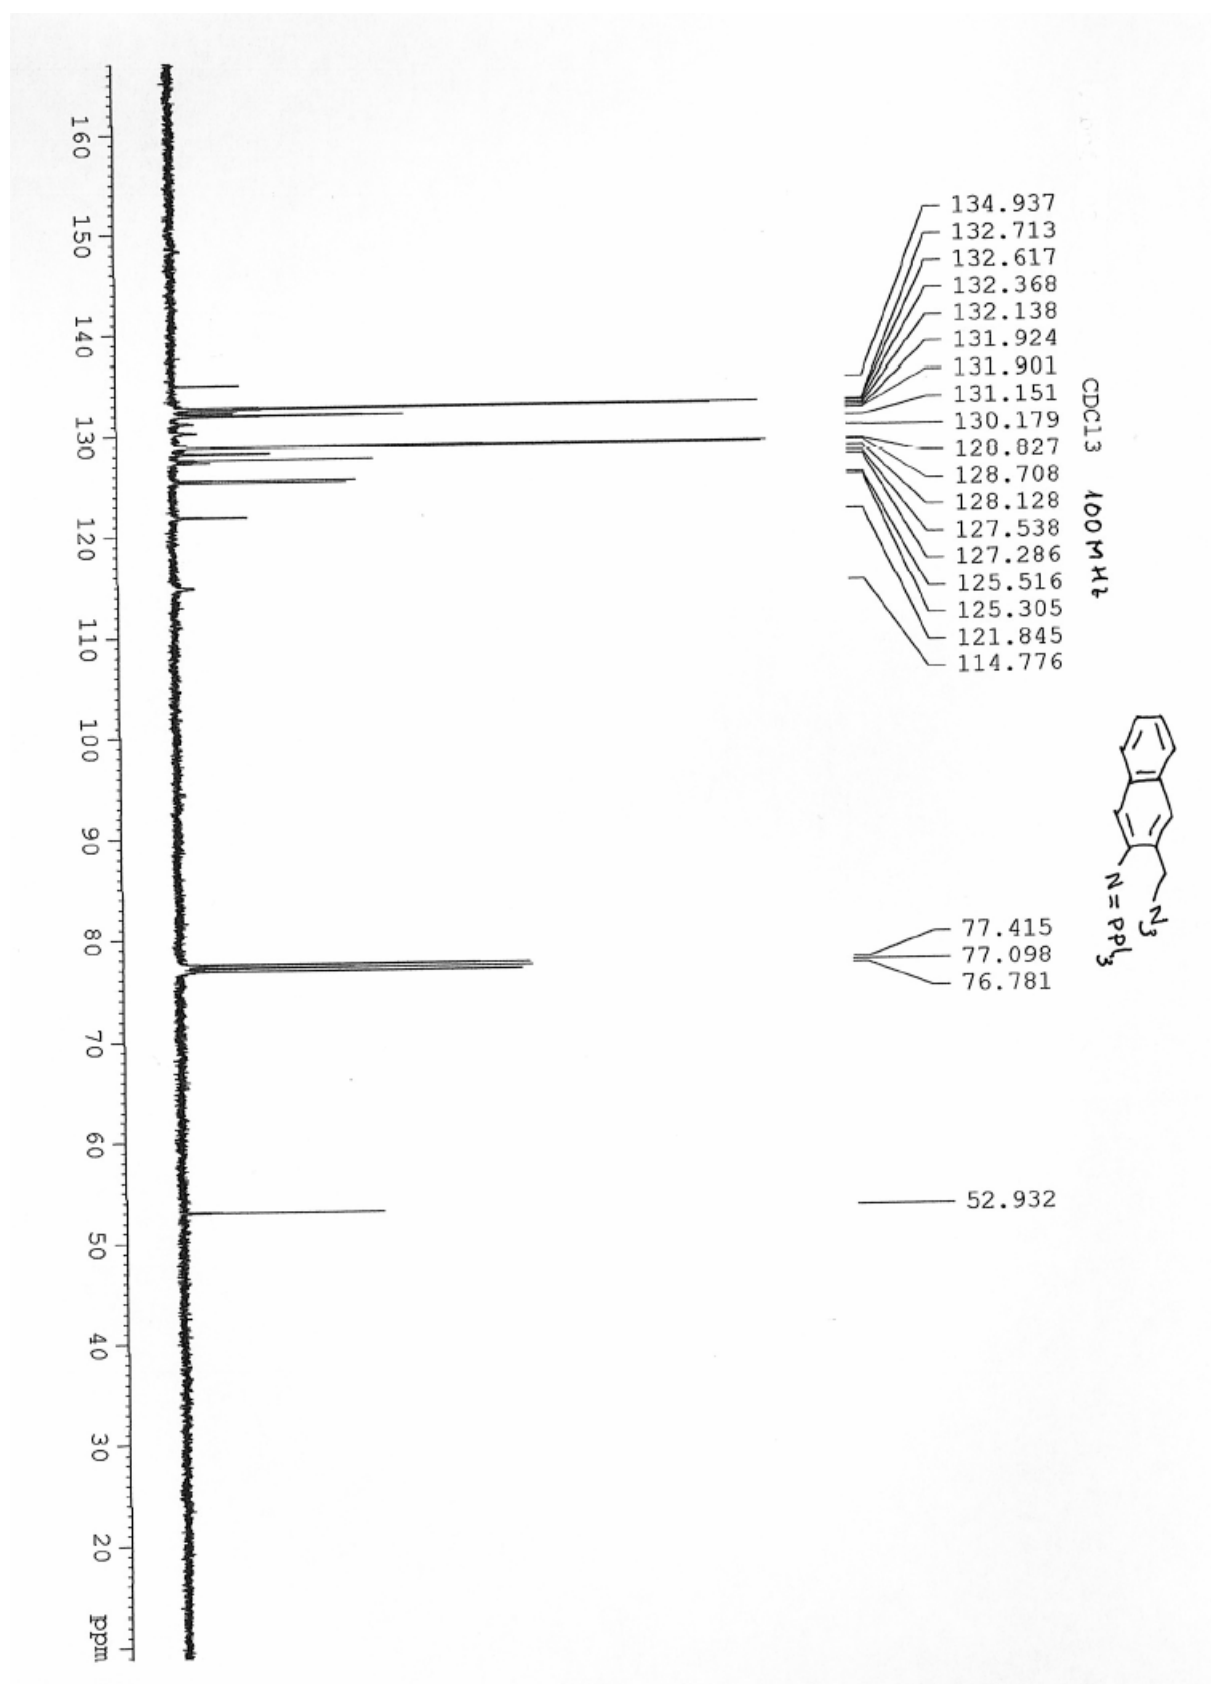

$^{31}\text{P}$  NMR of **2f**

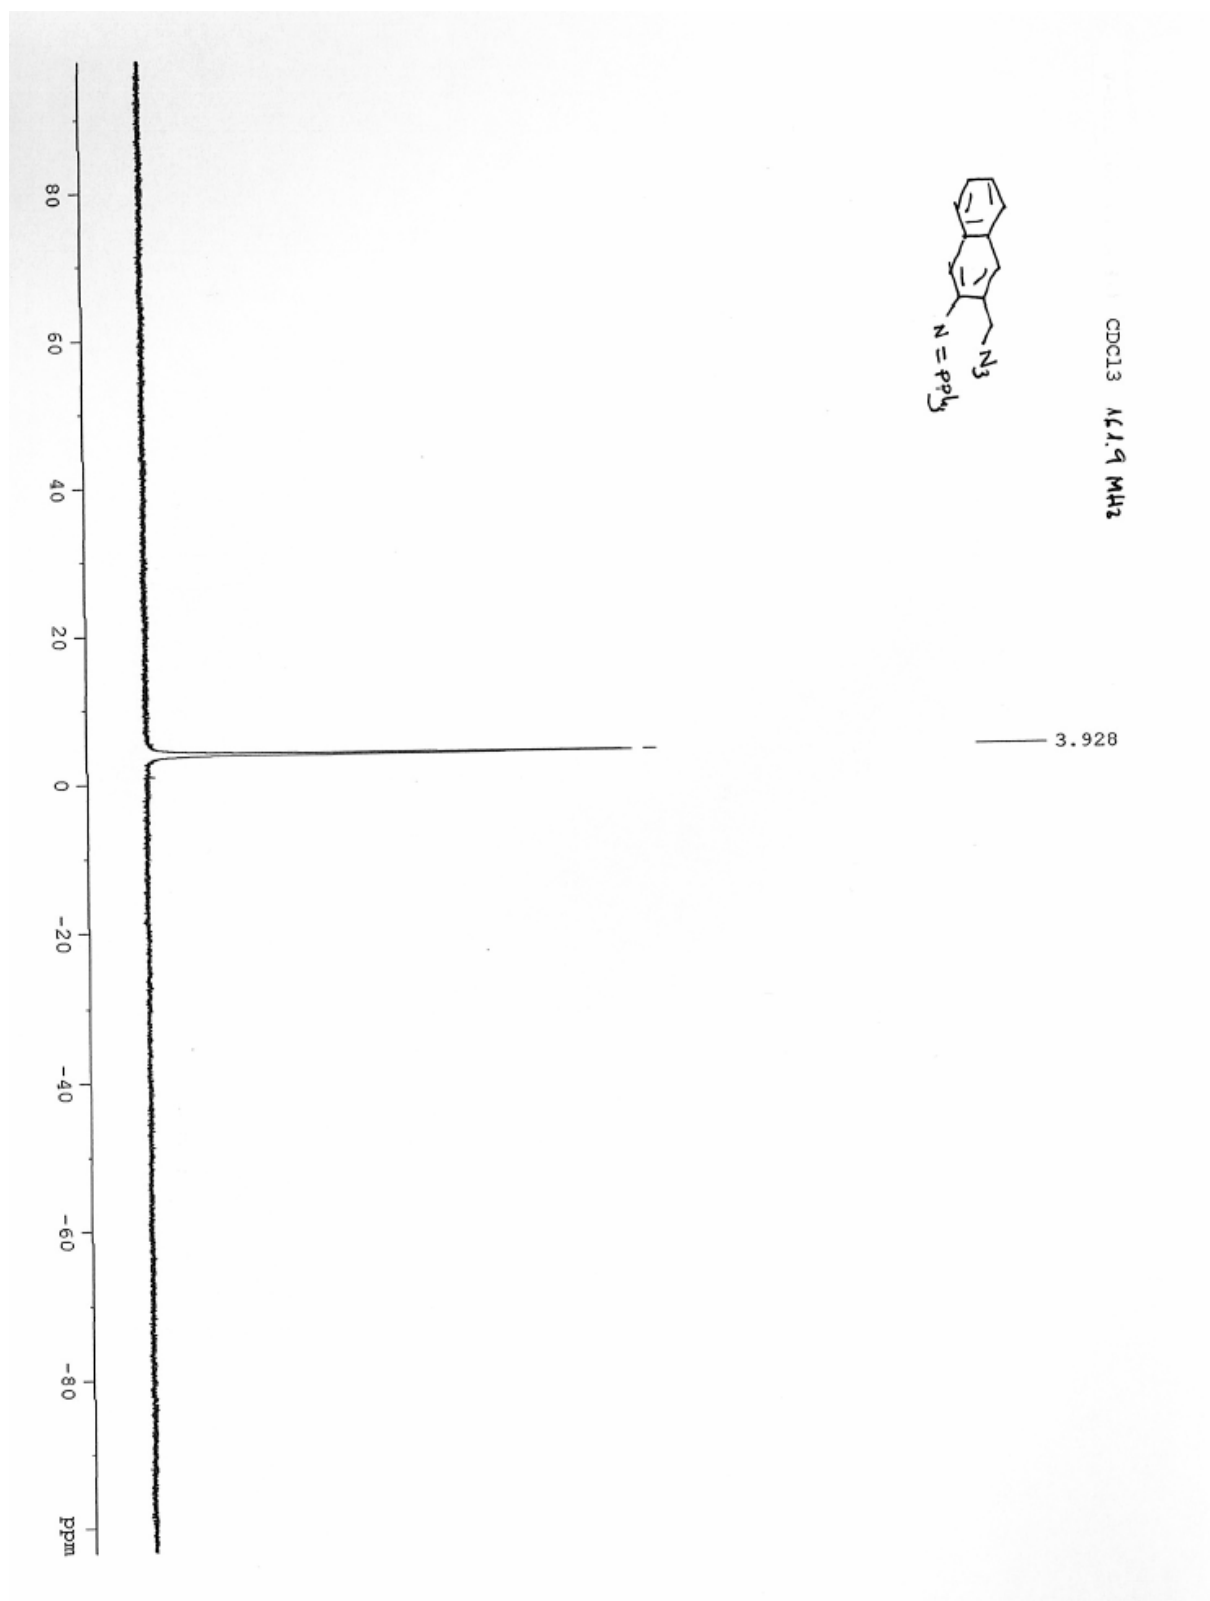

<sup>1</sup>H NMR of 4a

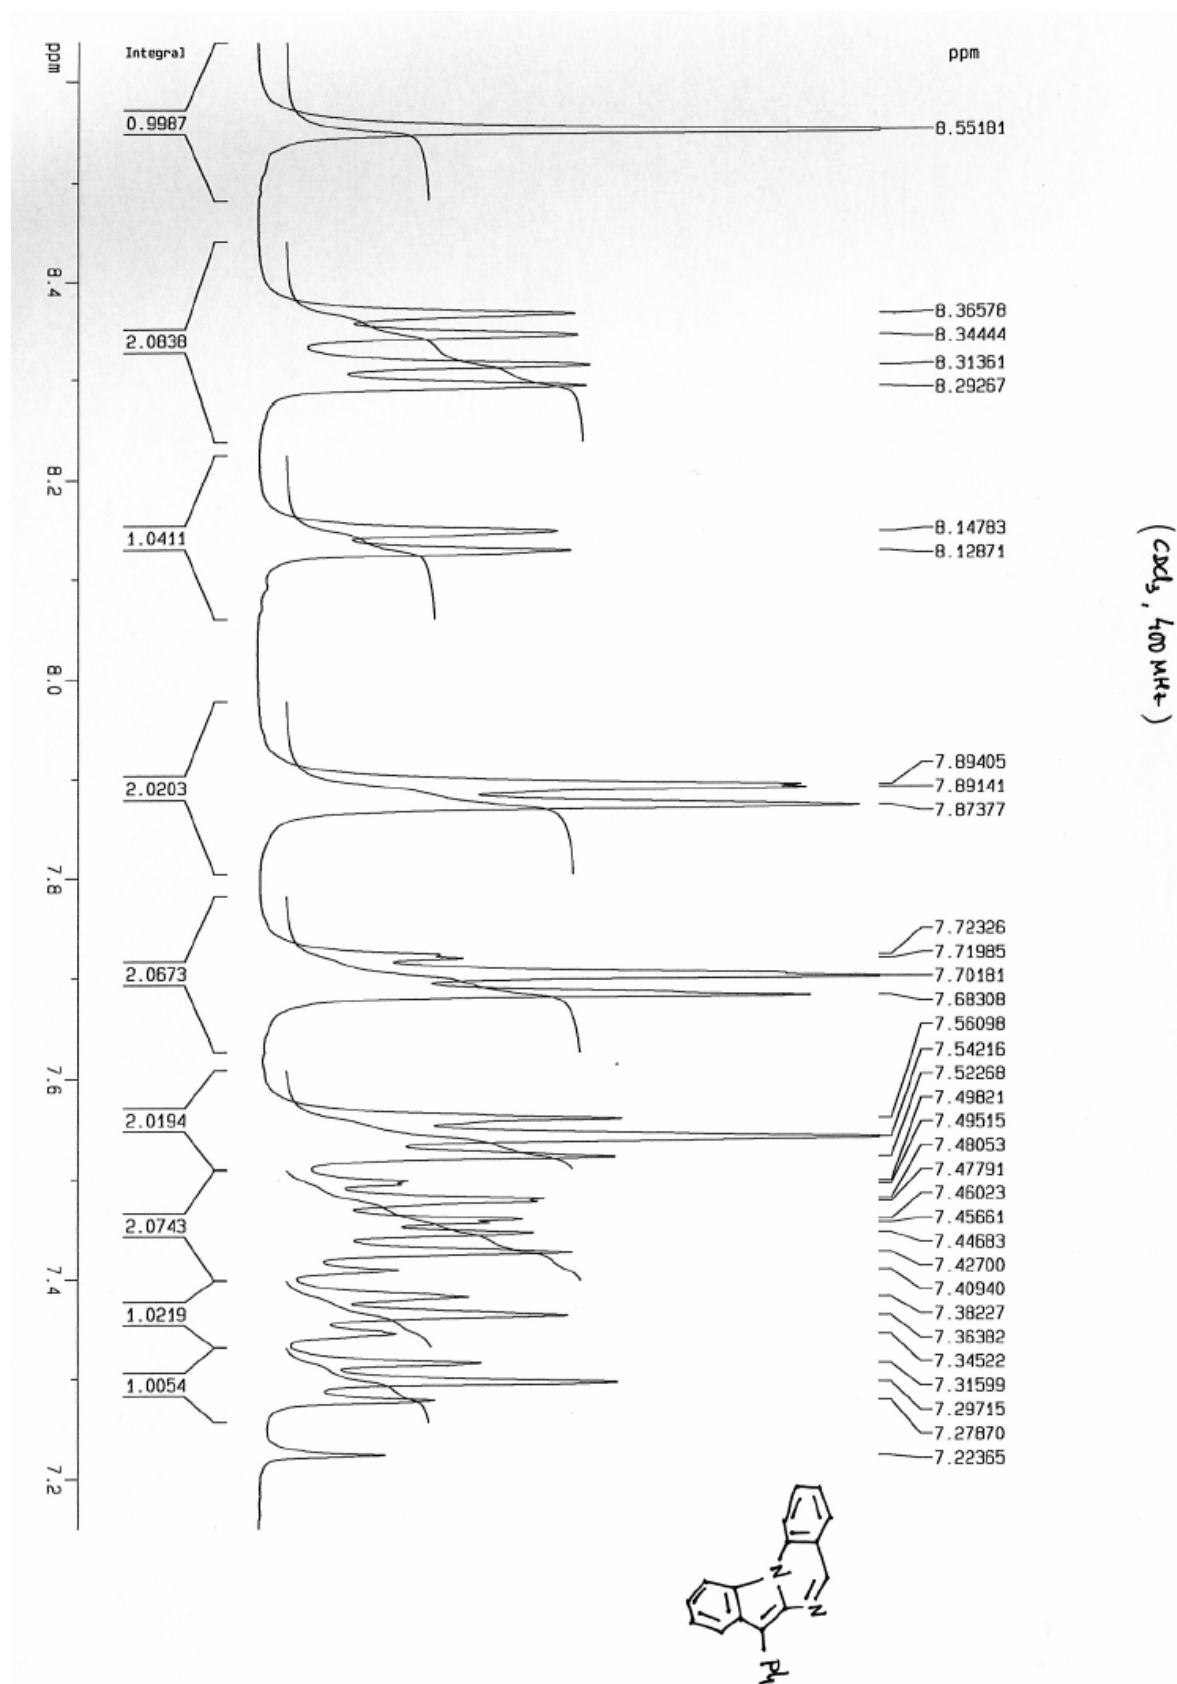

$^{13}\text{C}$  NMR of 4a

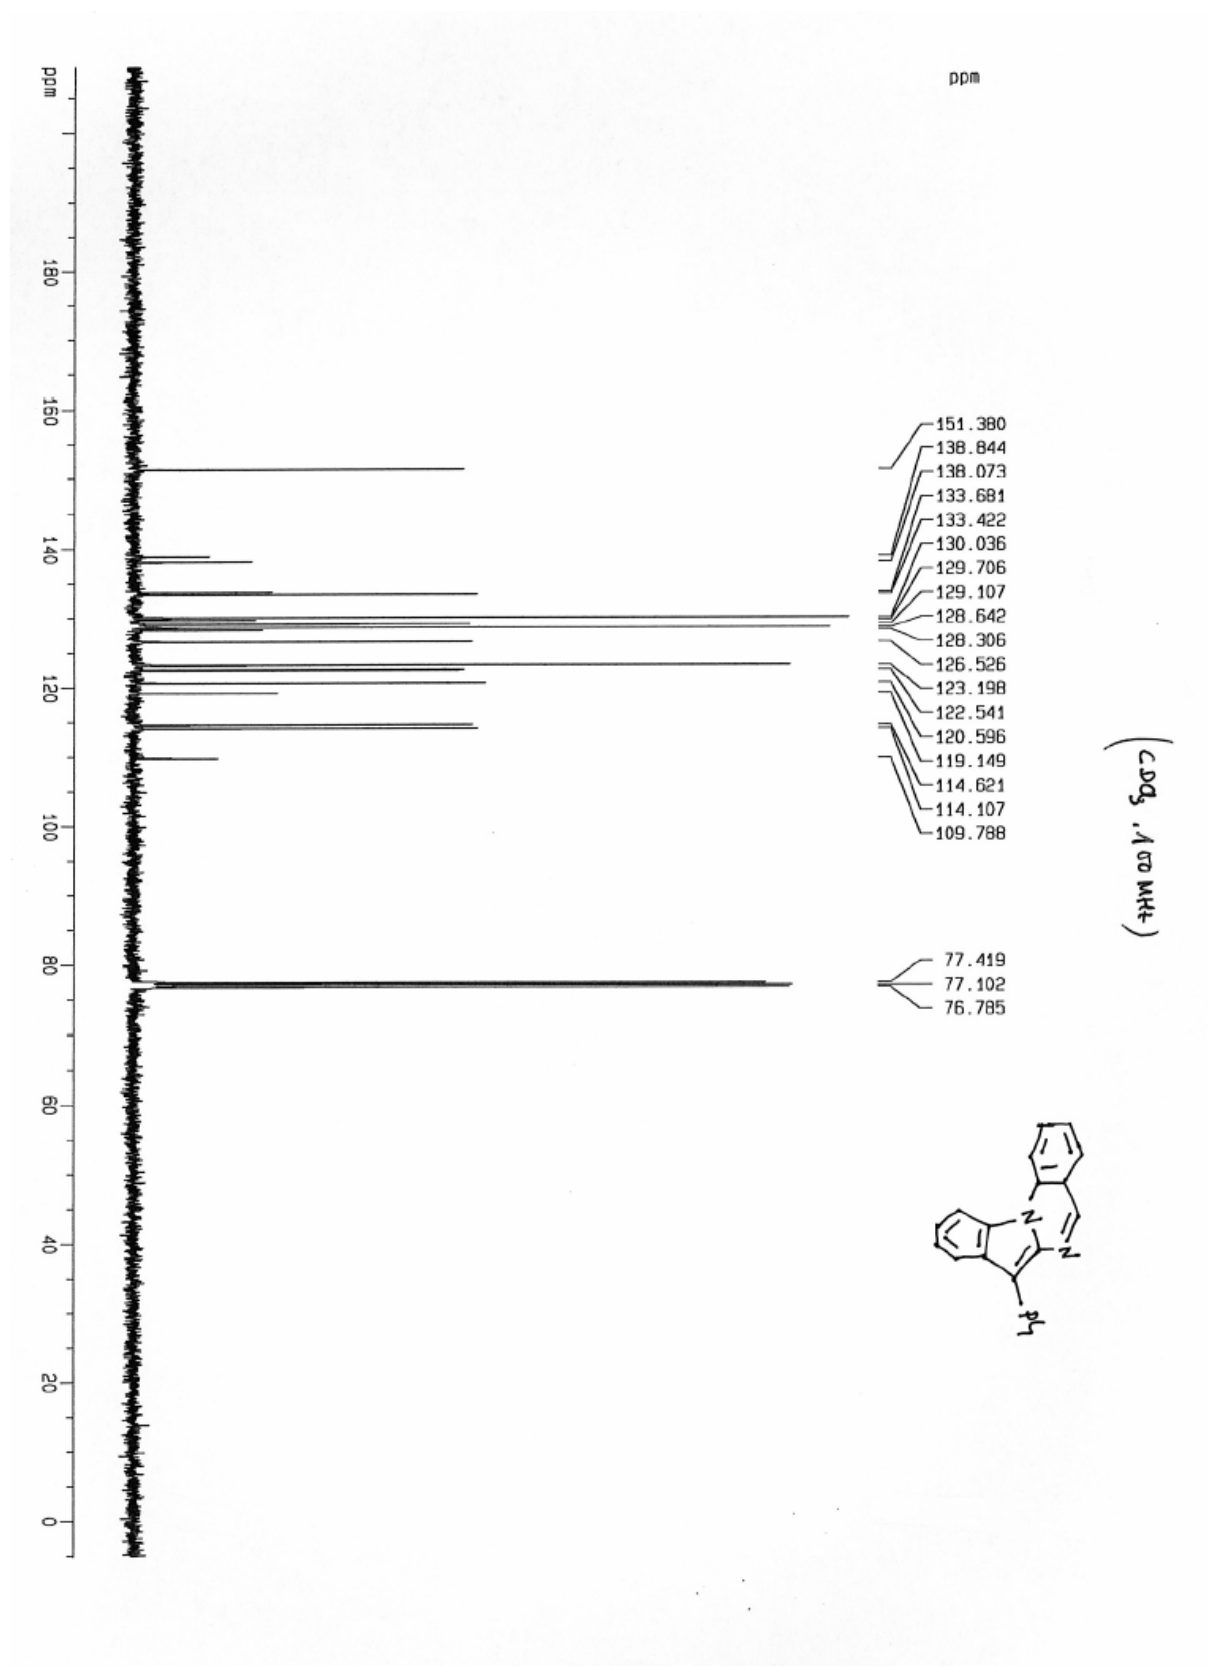

# <sup>1</sup>H NMR of 4c

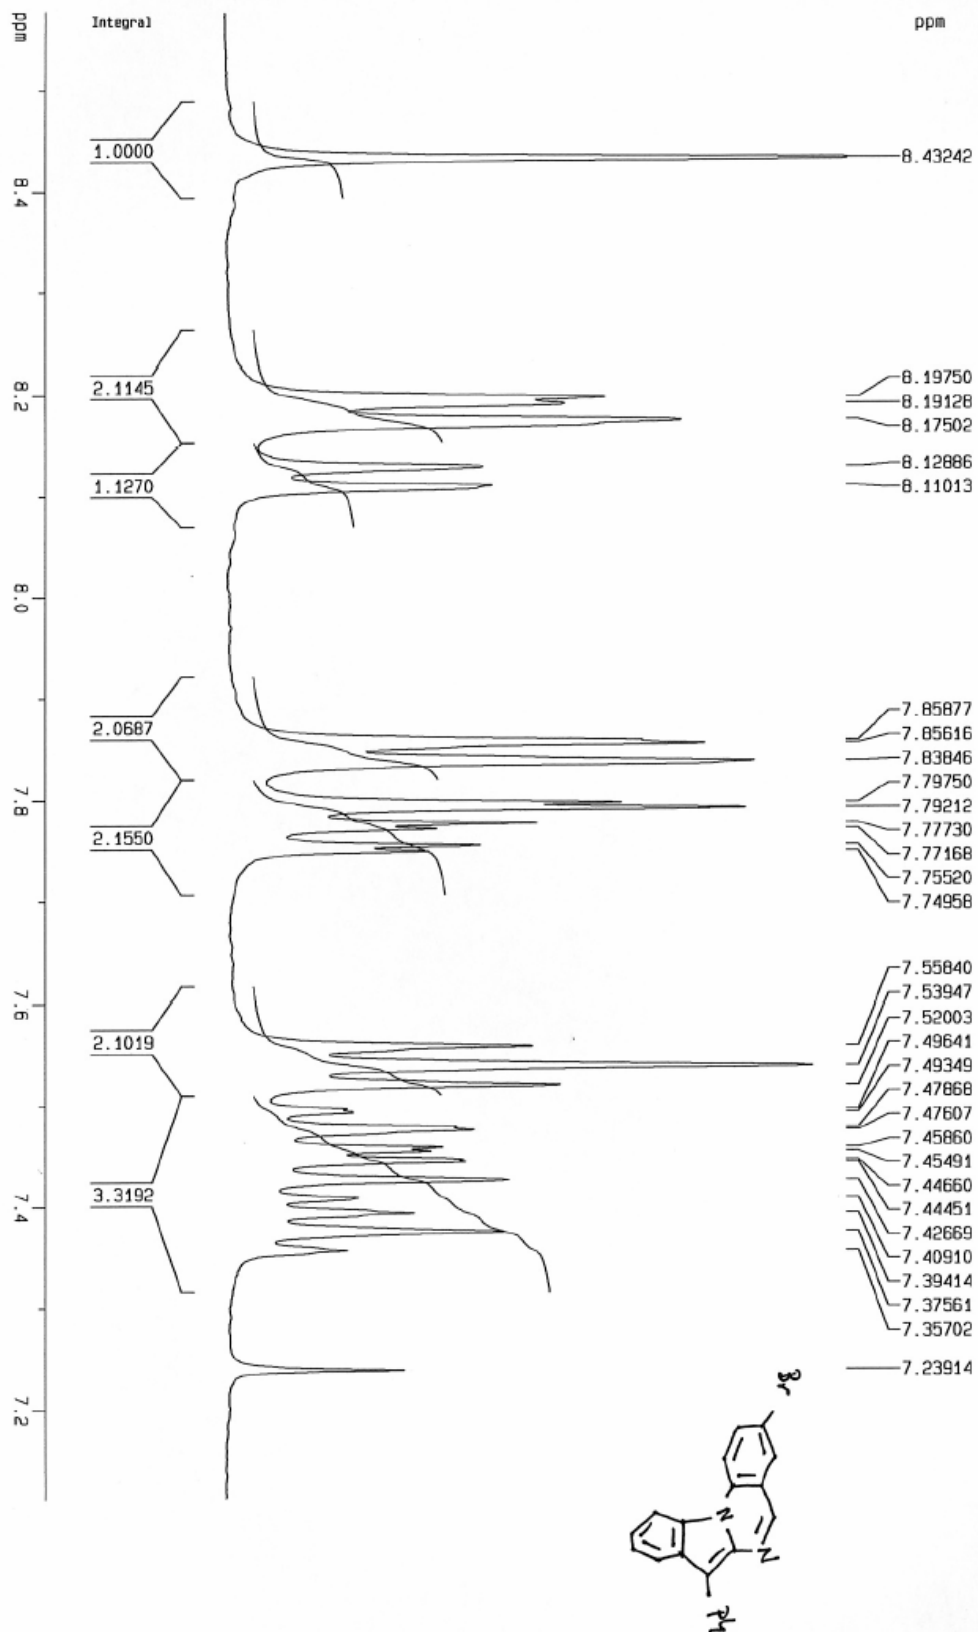

(CDCl<sub>3</sub>, 400 MHz)

$^{13}\text{C}$  NMR of **4c**

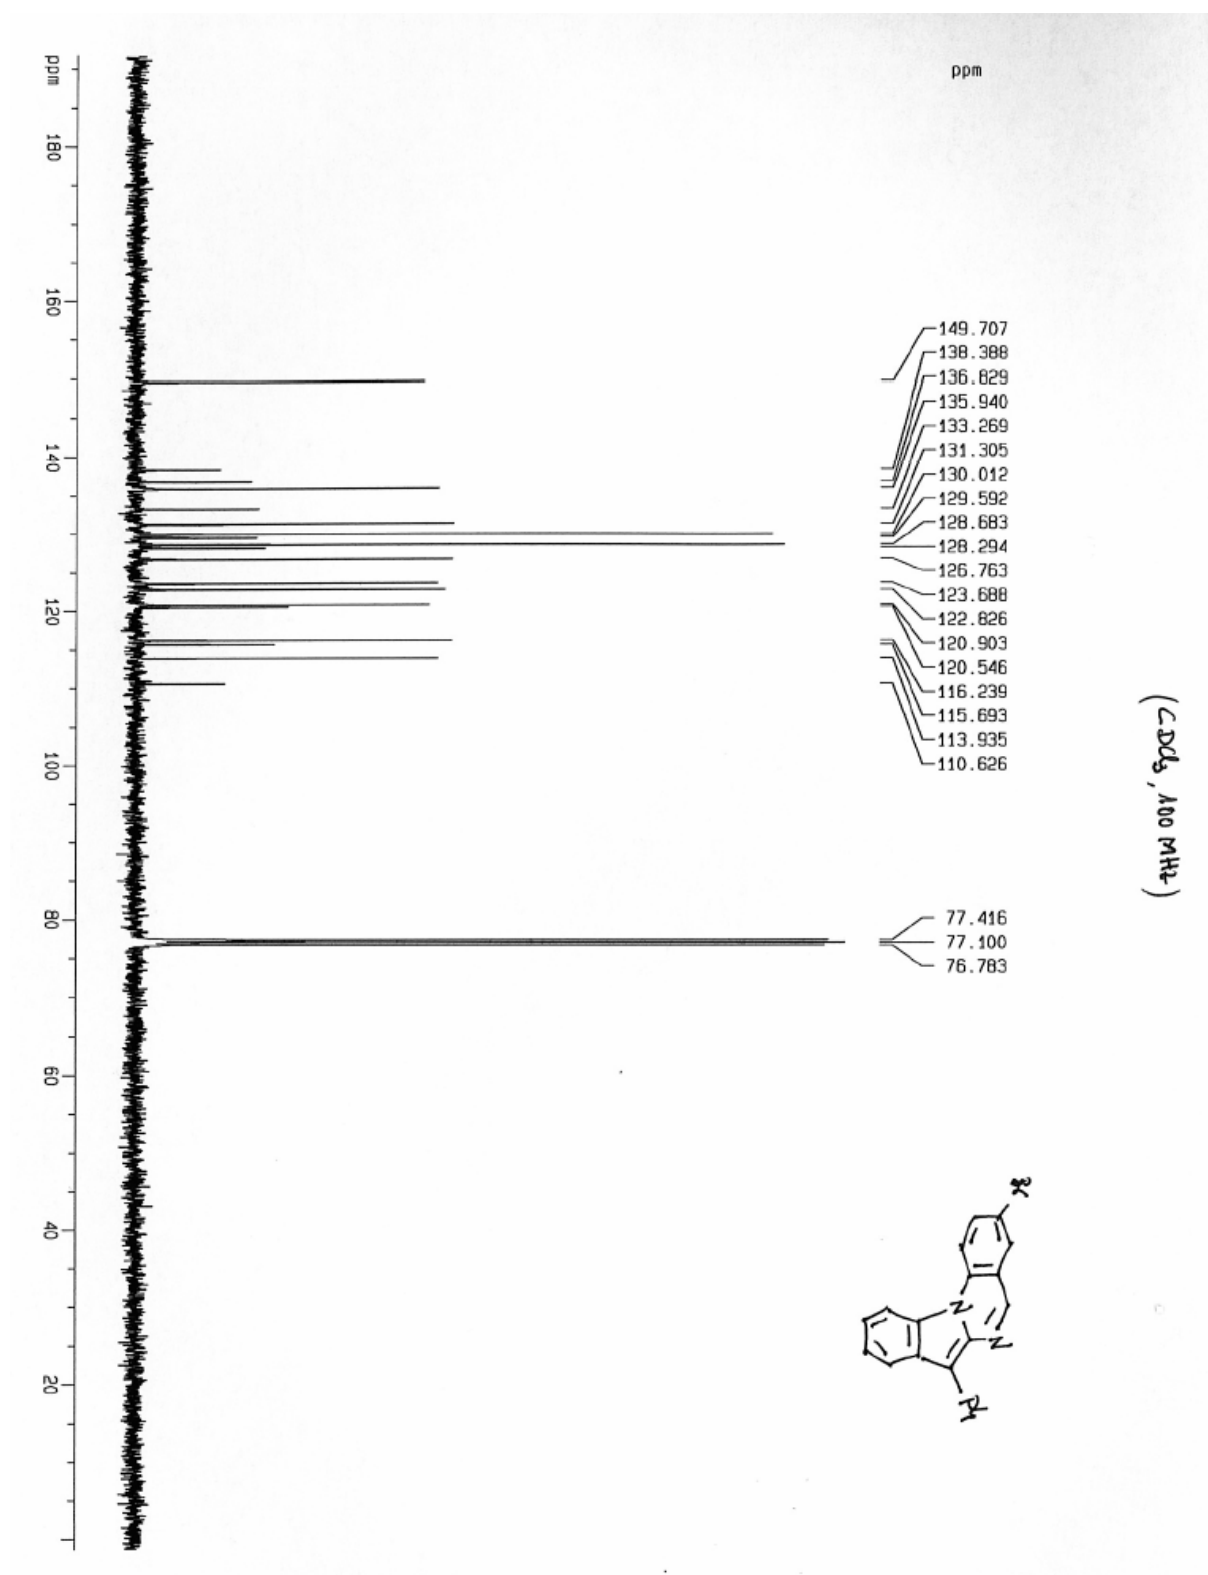

### <sup>1</sup>H NMR of 4d

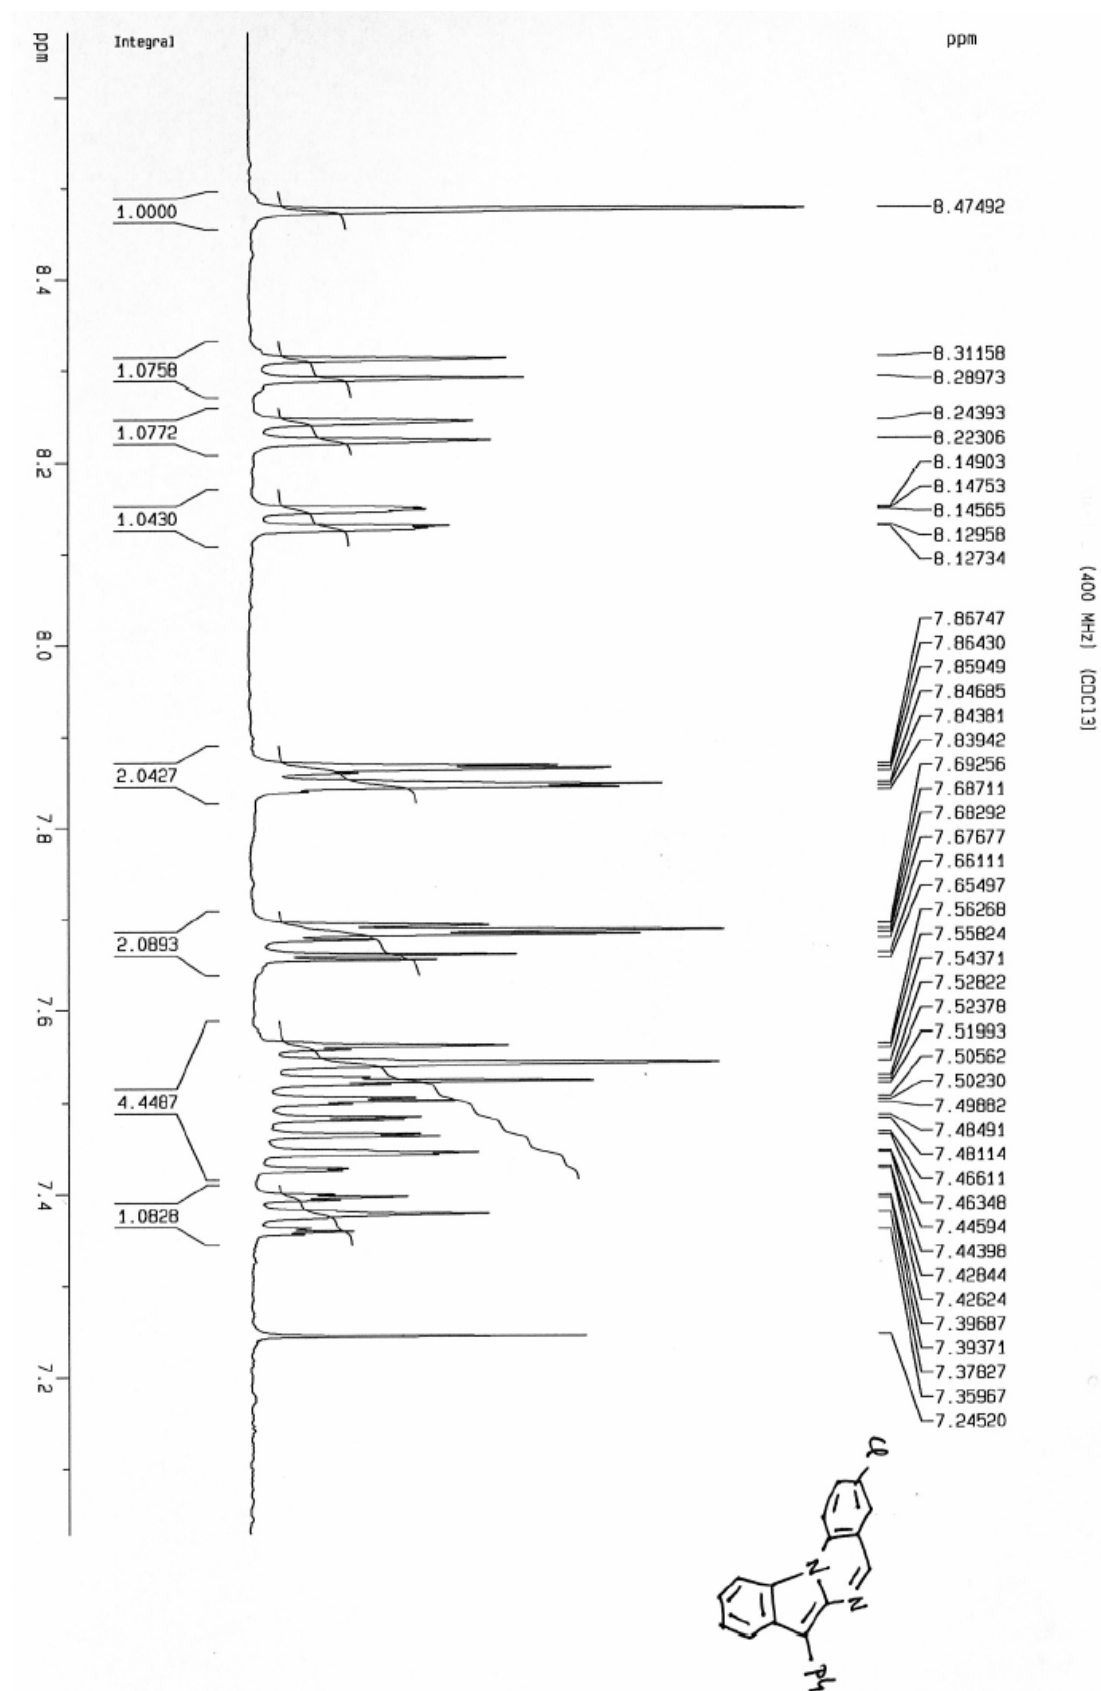



$^{13}\text{C}$  NMR of **4d**

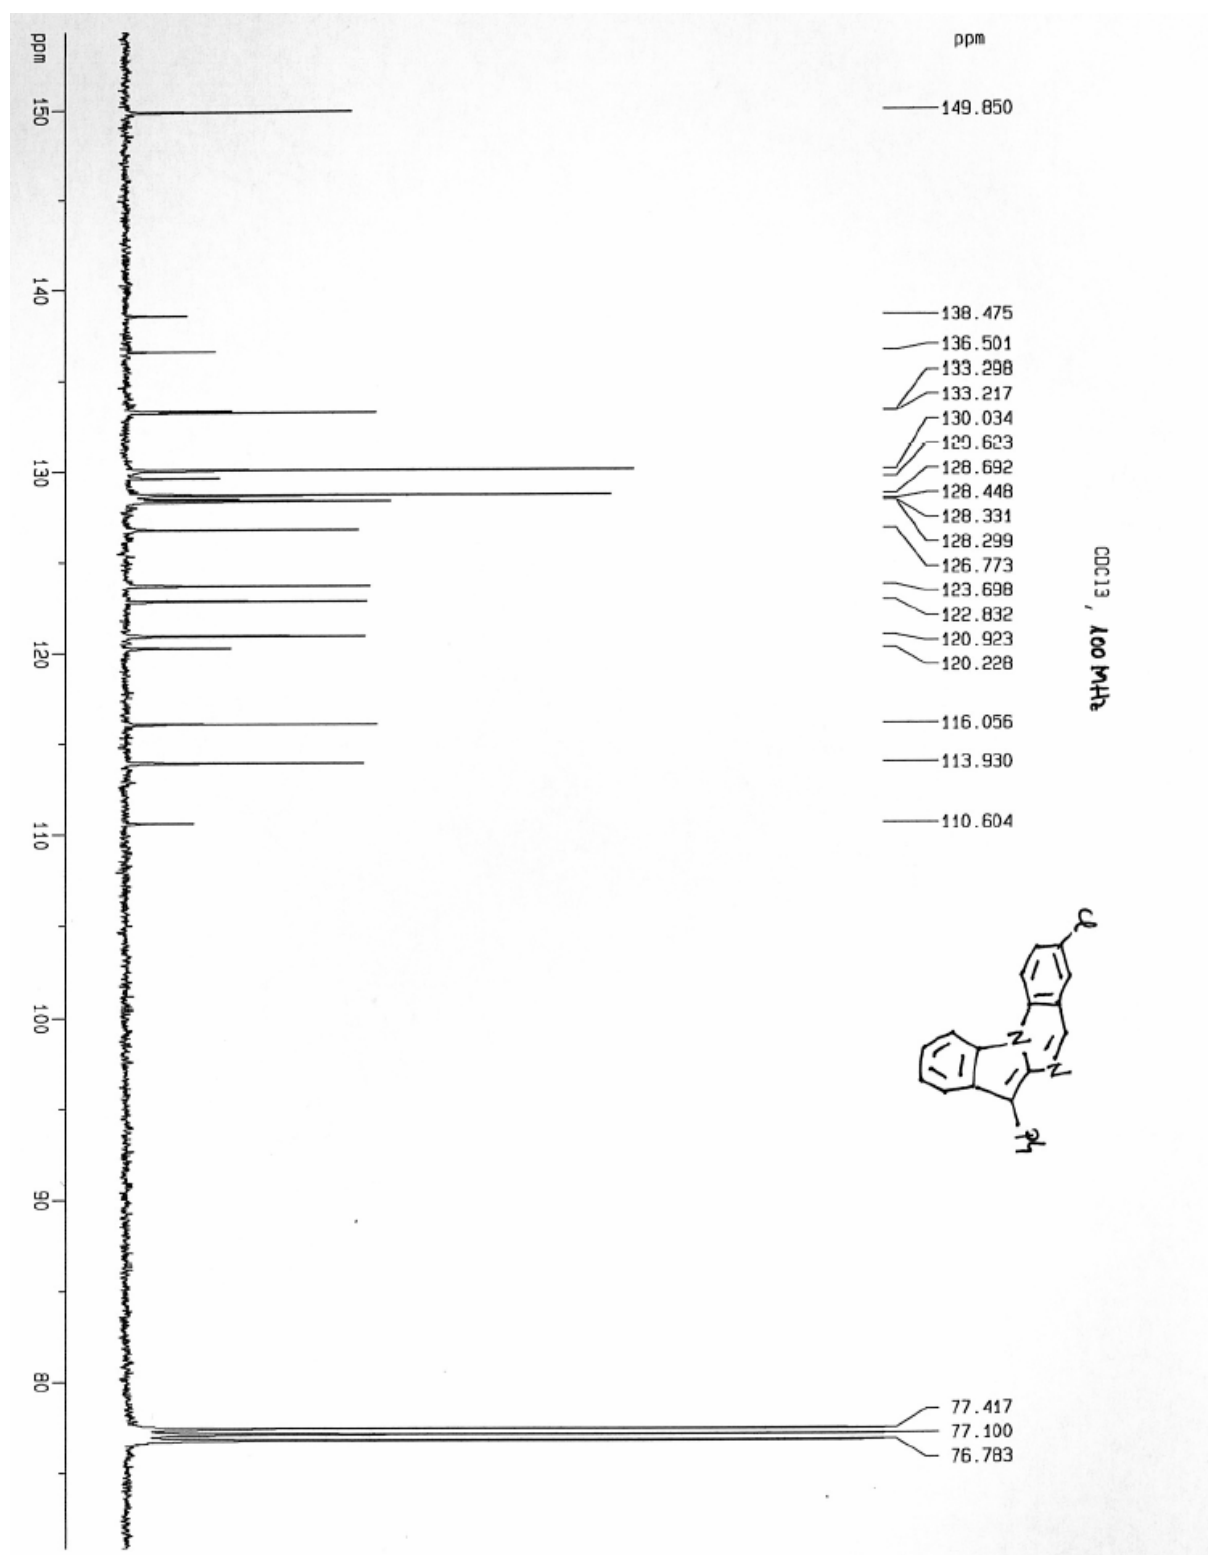

$^1\text{H}$  NMR of **4e**

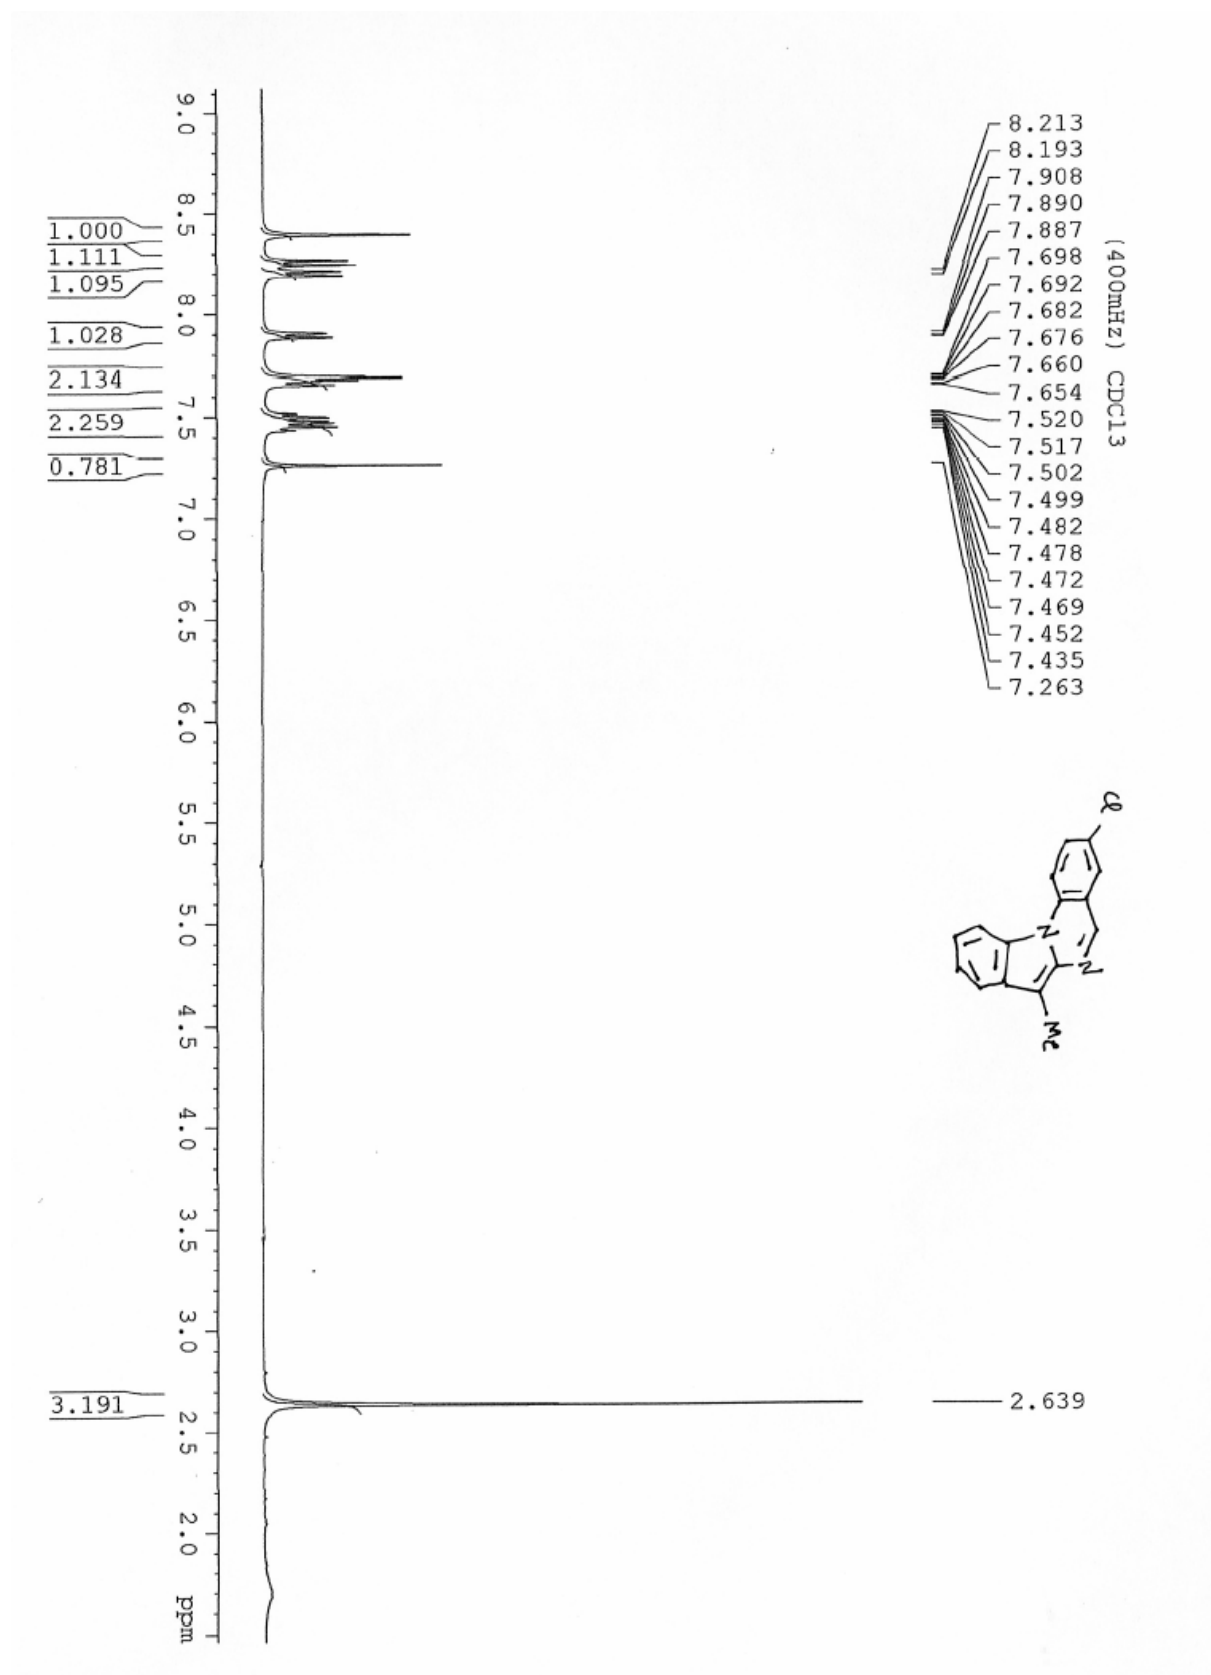

$^{13}\text{C}$  NMR of **4e**

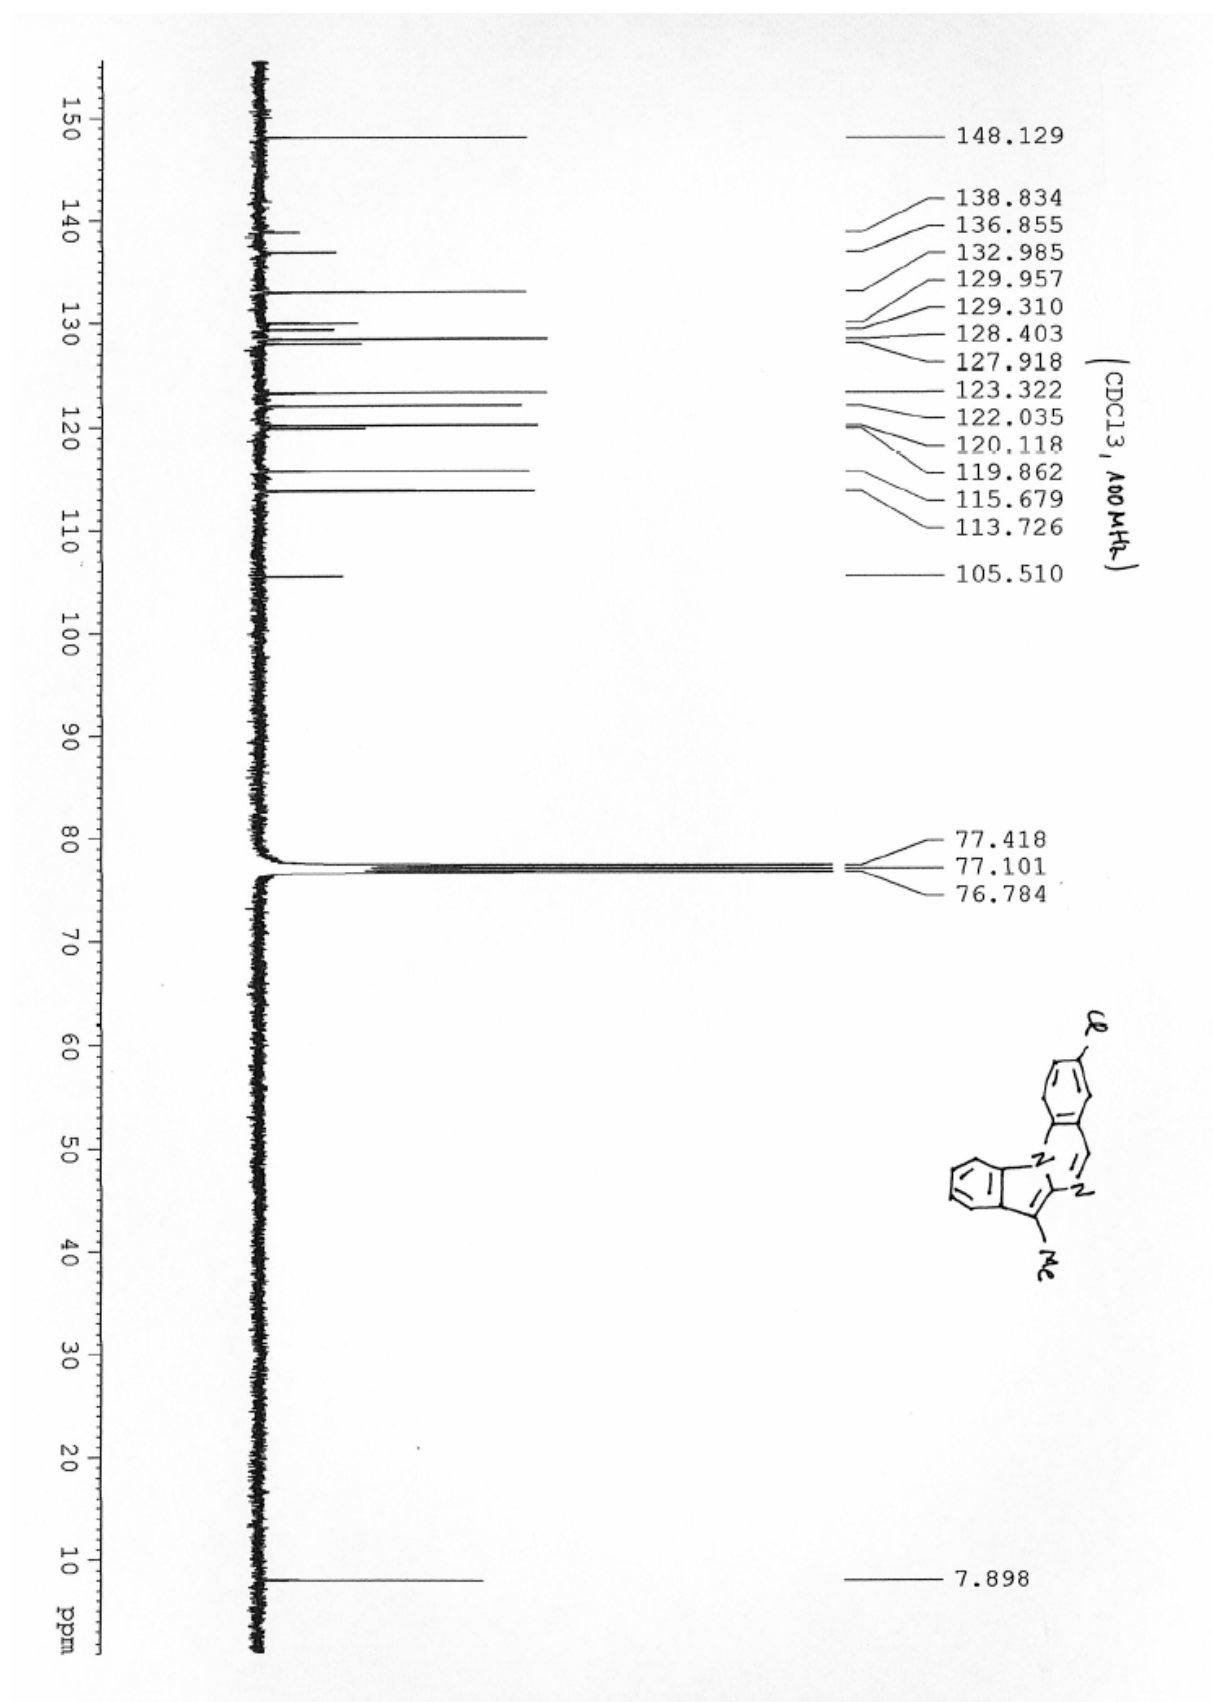

$^1\text{H}$  NMR of **4f**

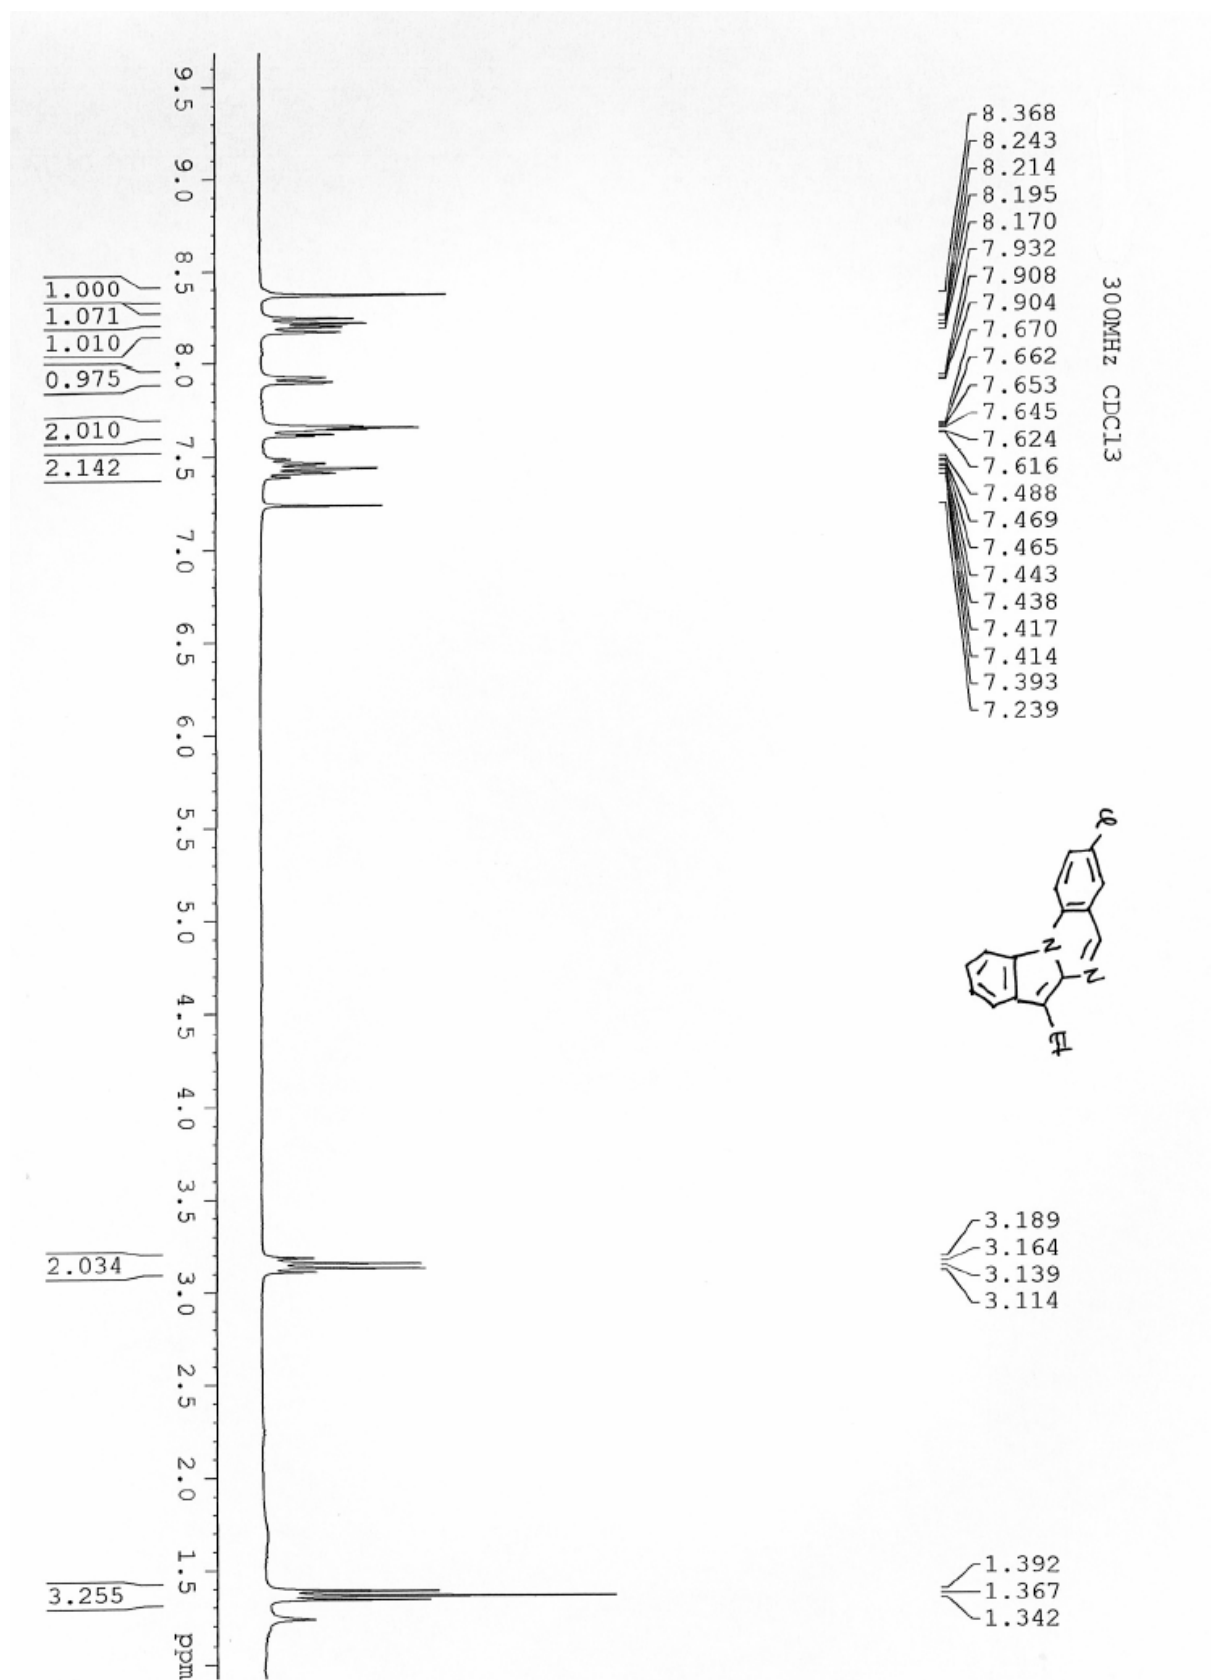

$^{13}\text{C}$  NMR of **4f**

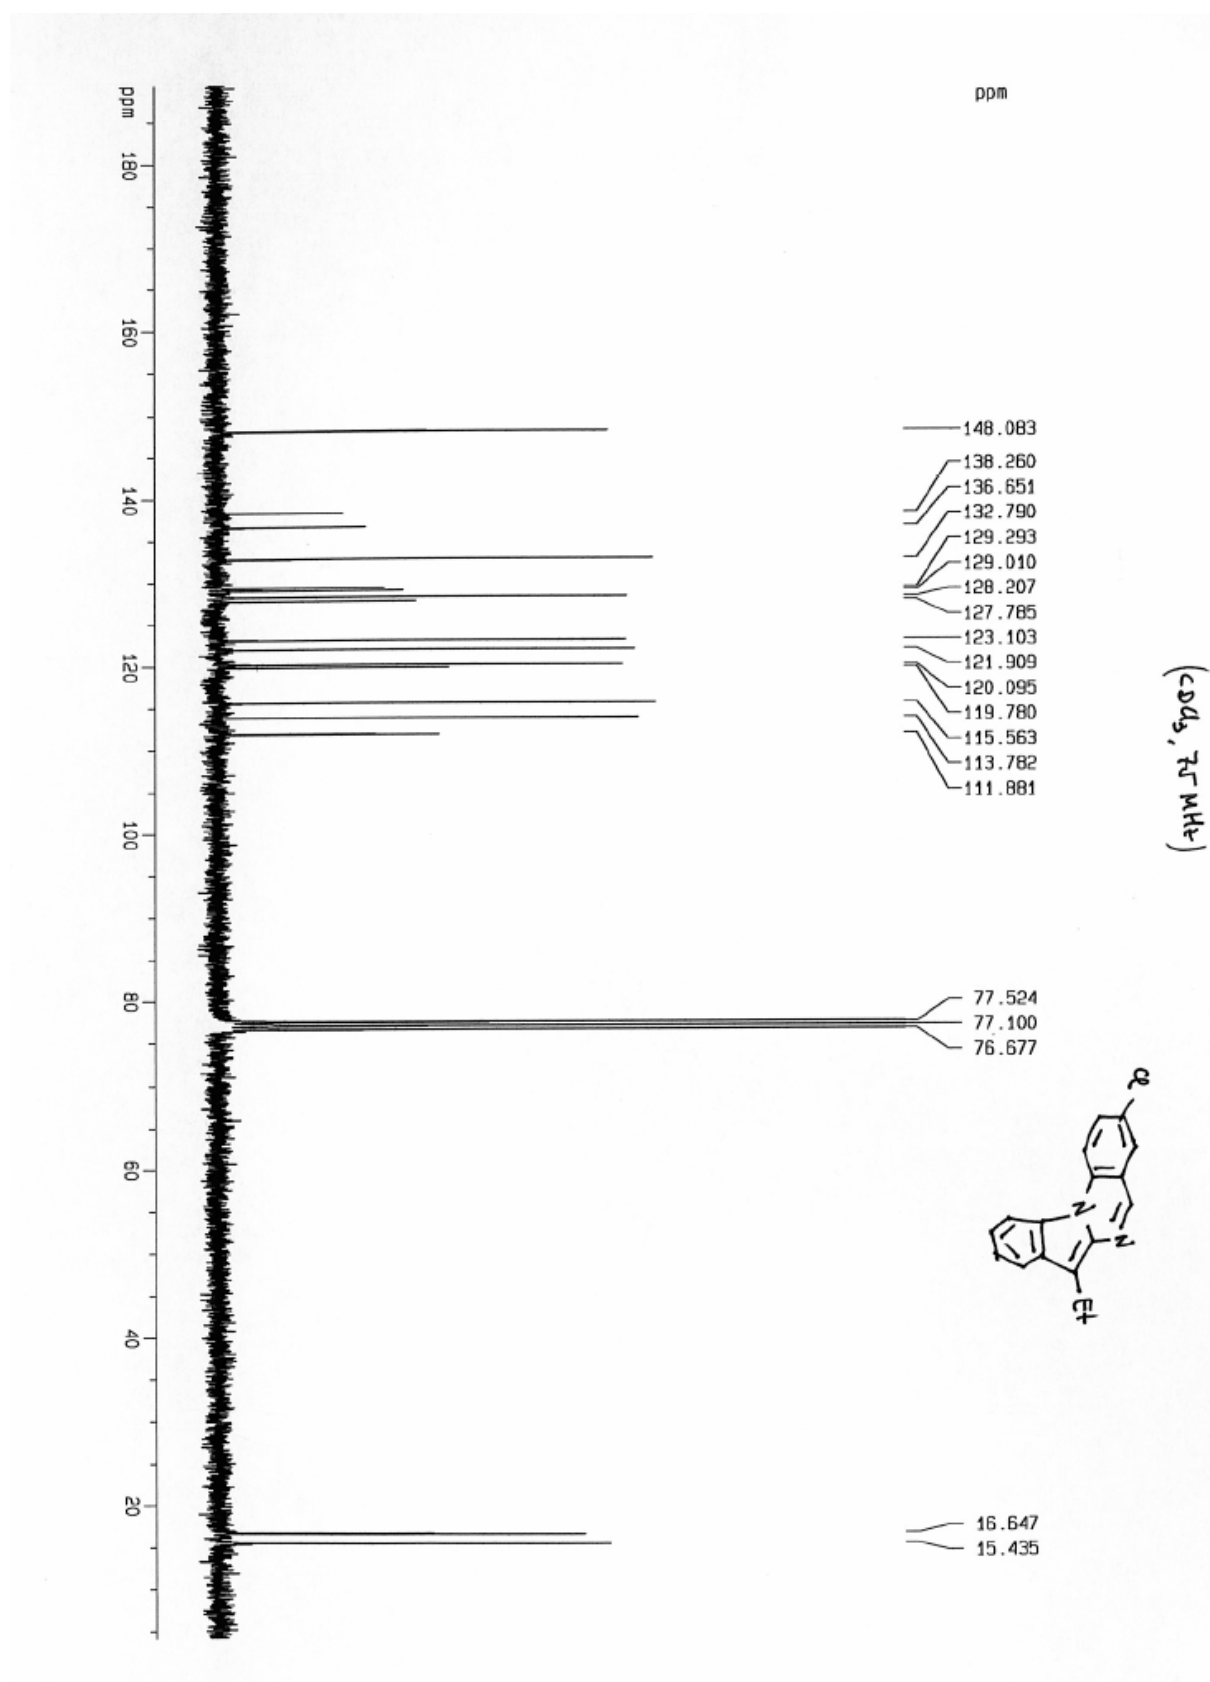

$^1\text{H}$  NMR of **4g**

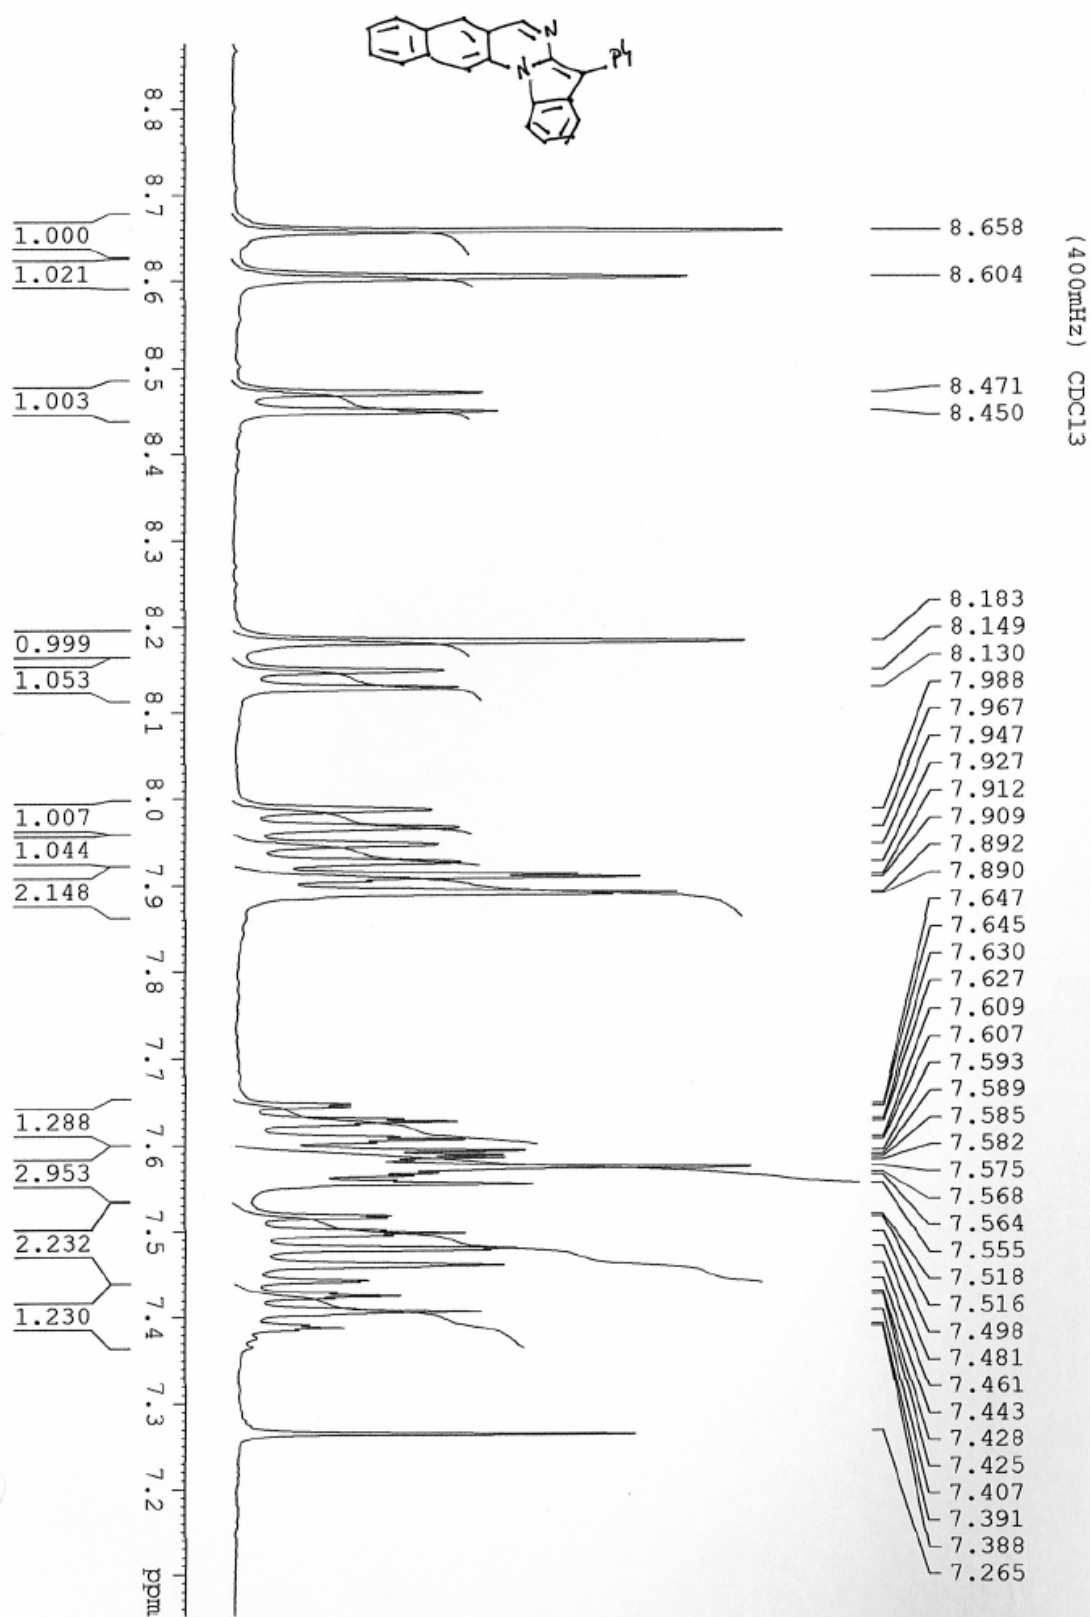

$^{13}\text{C}$  NMR of 4g

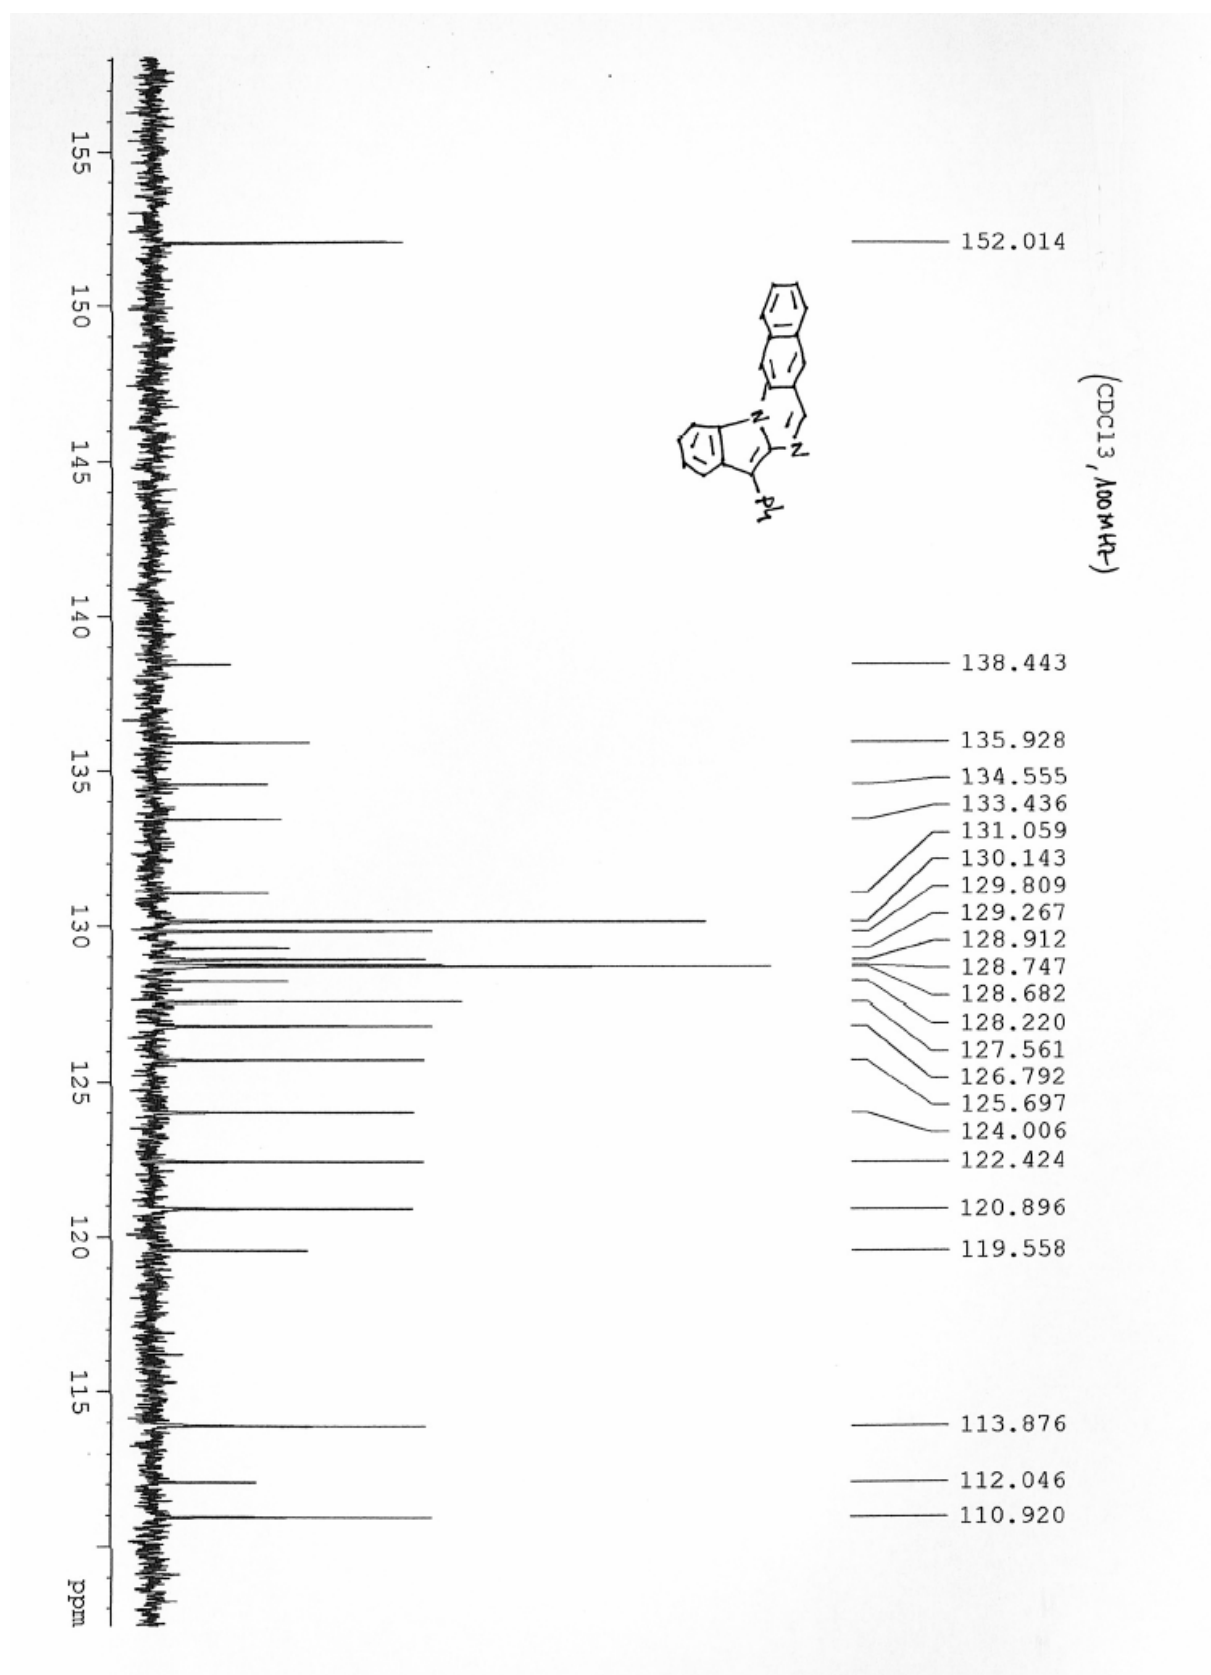



$^1\text{H}$  NMR of **4h**

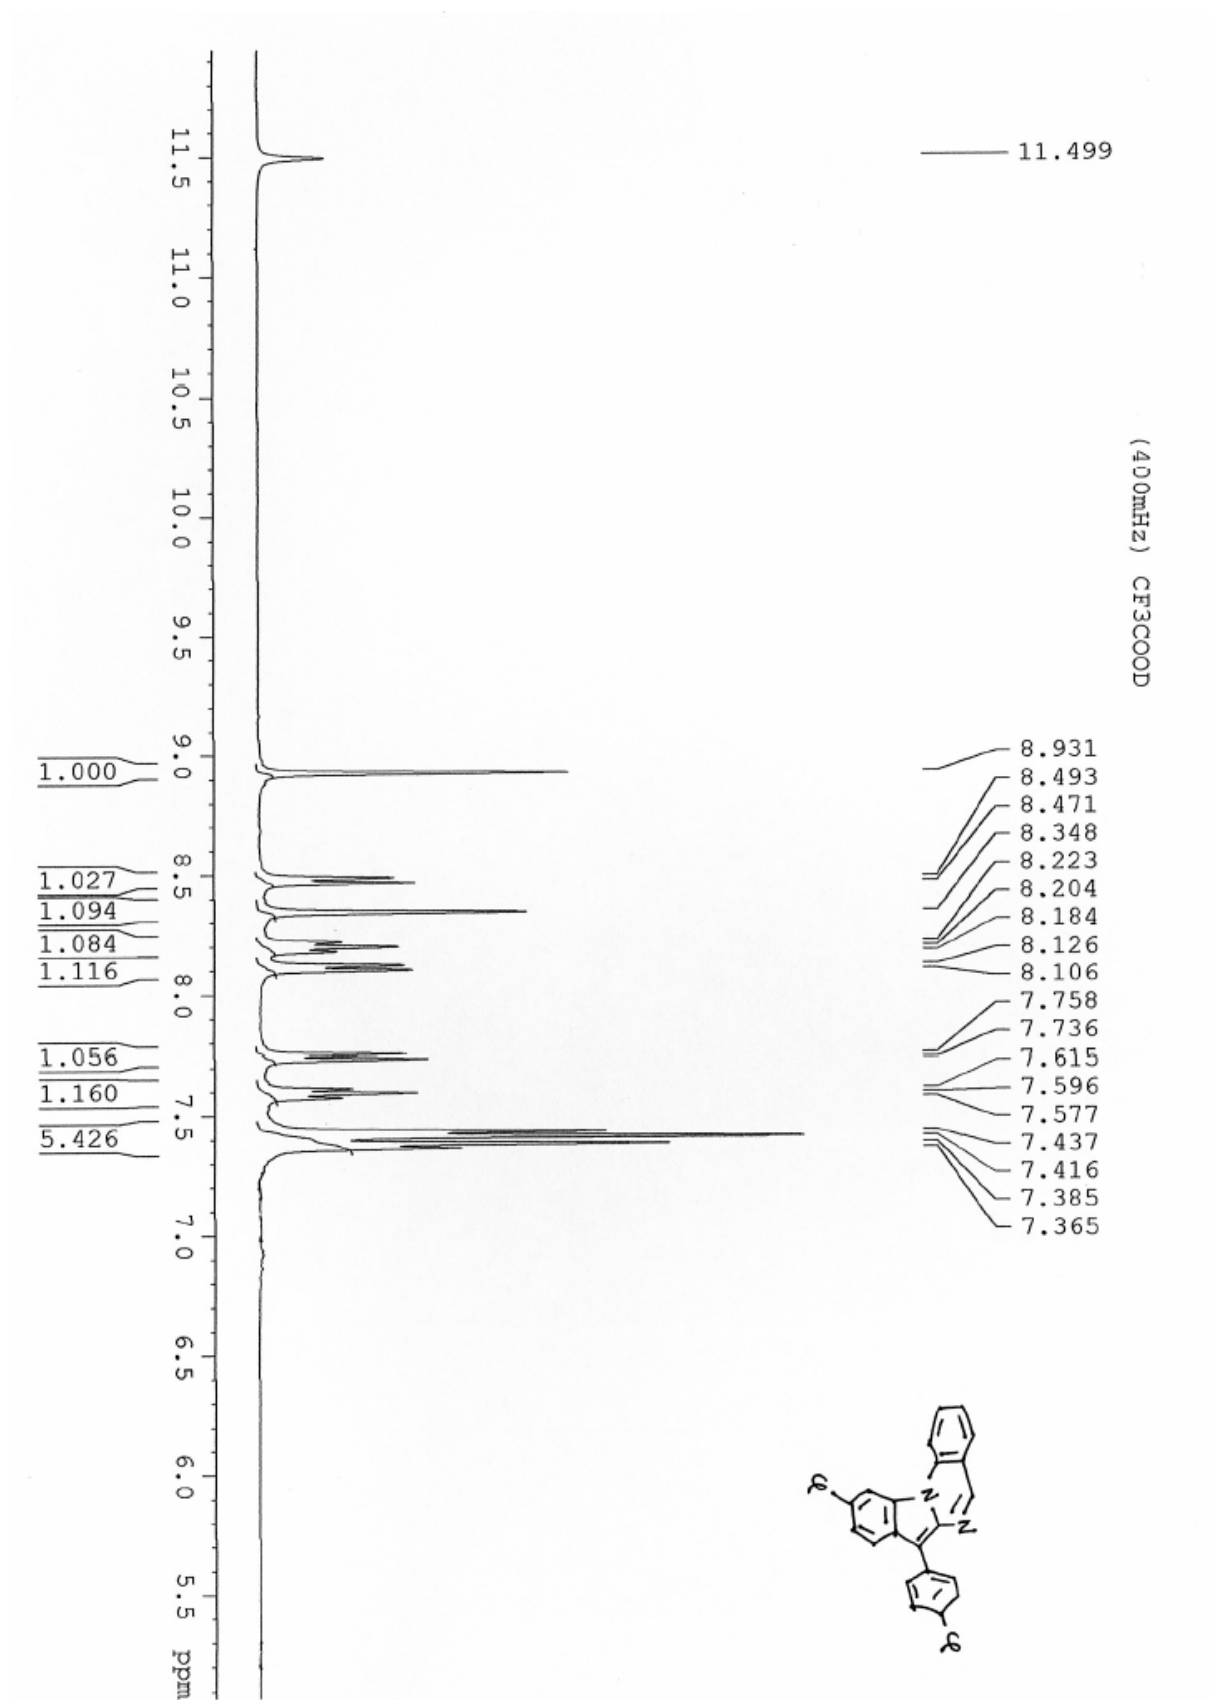



$^{13}\text{C}$  NMR of **4h**

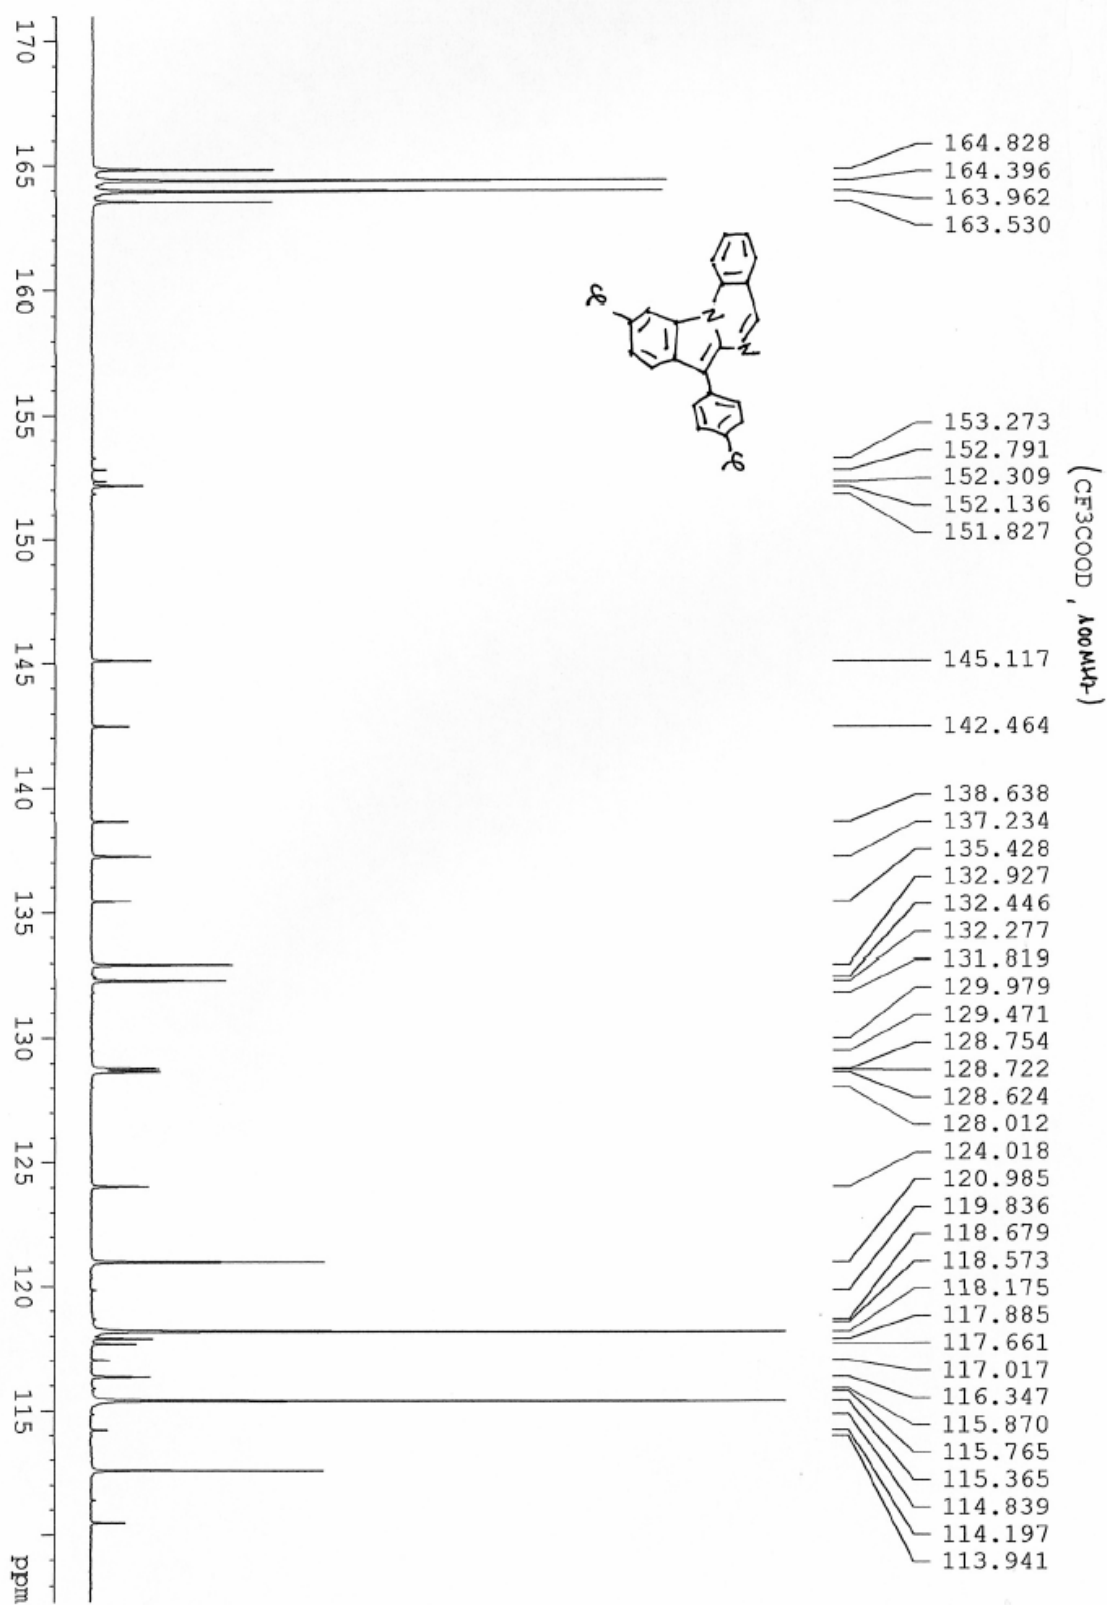

$^1\text{H}$  NMR of **4i**

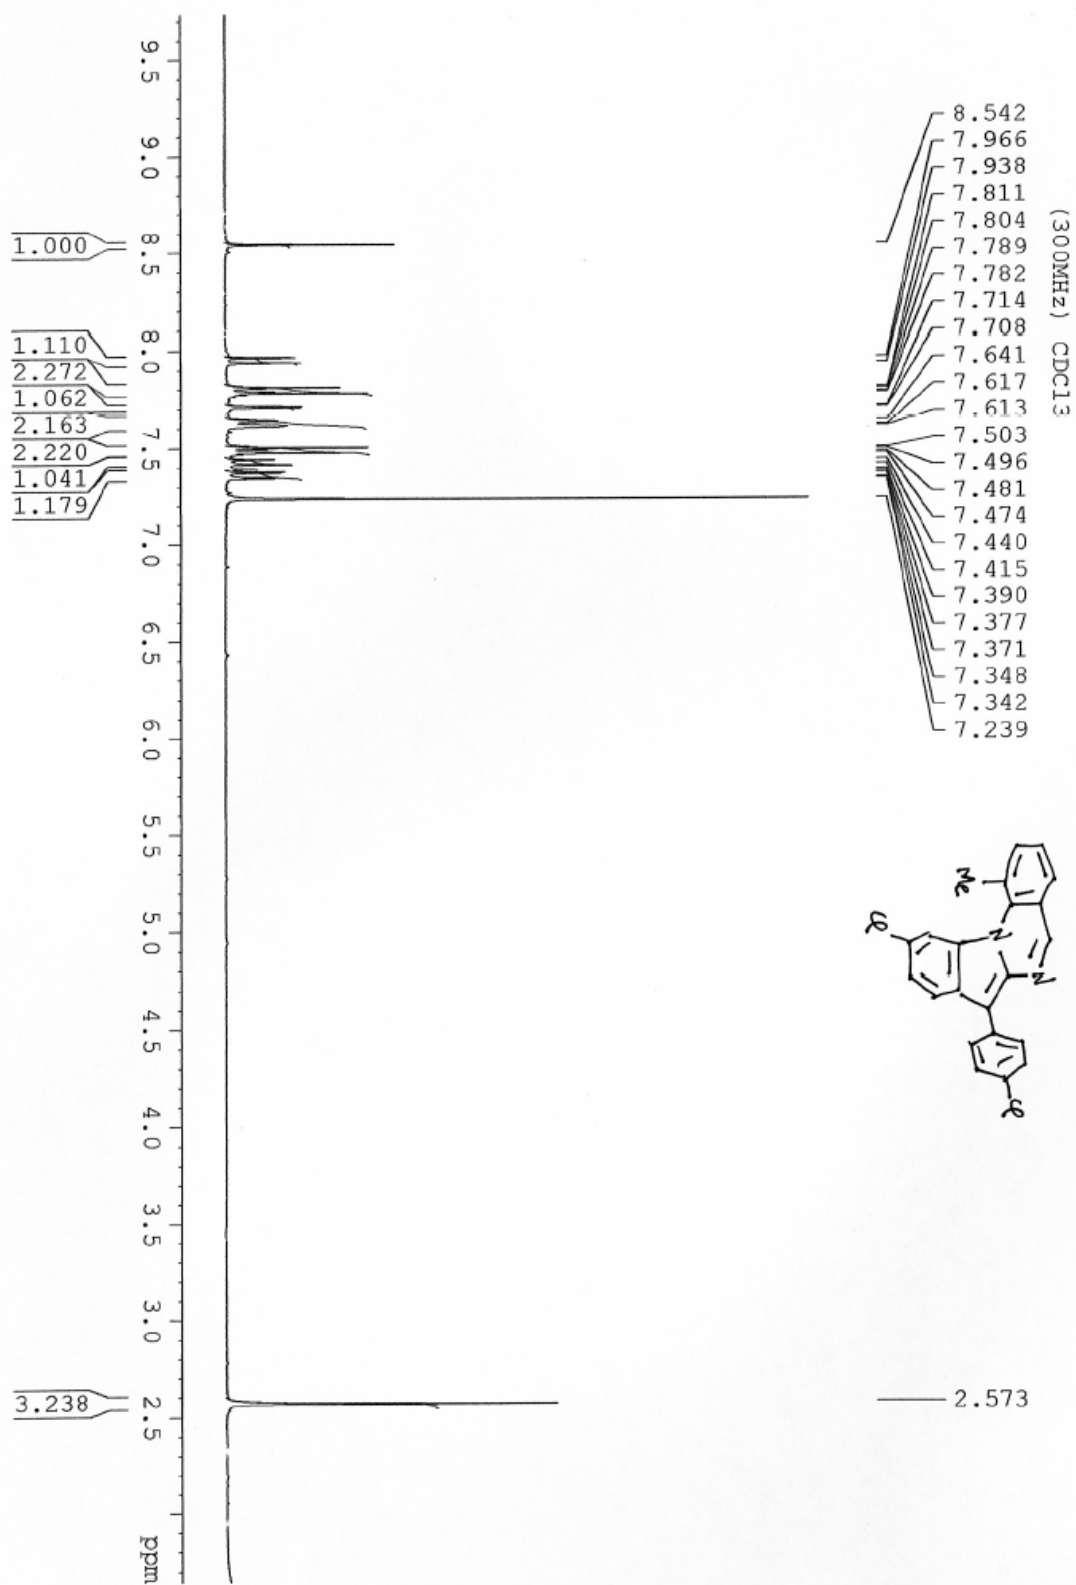

$^{13}\text{C}$  NMR of **4i**

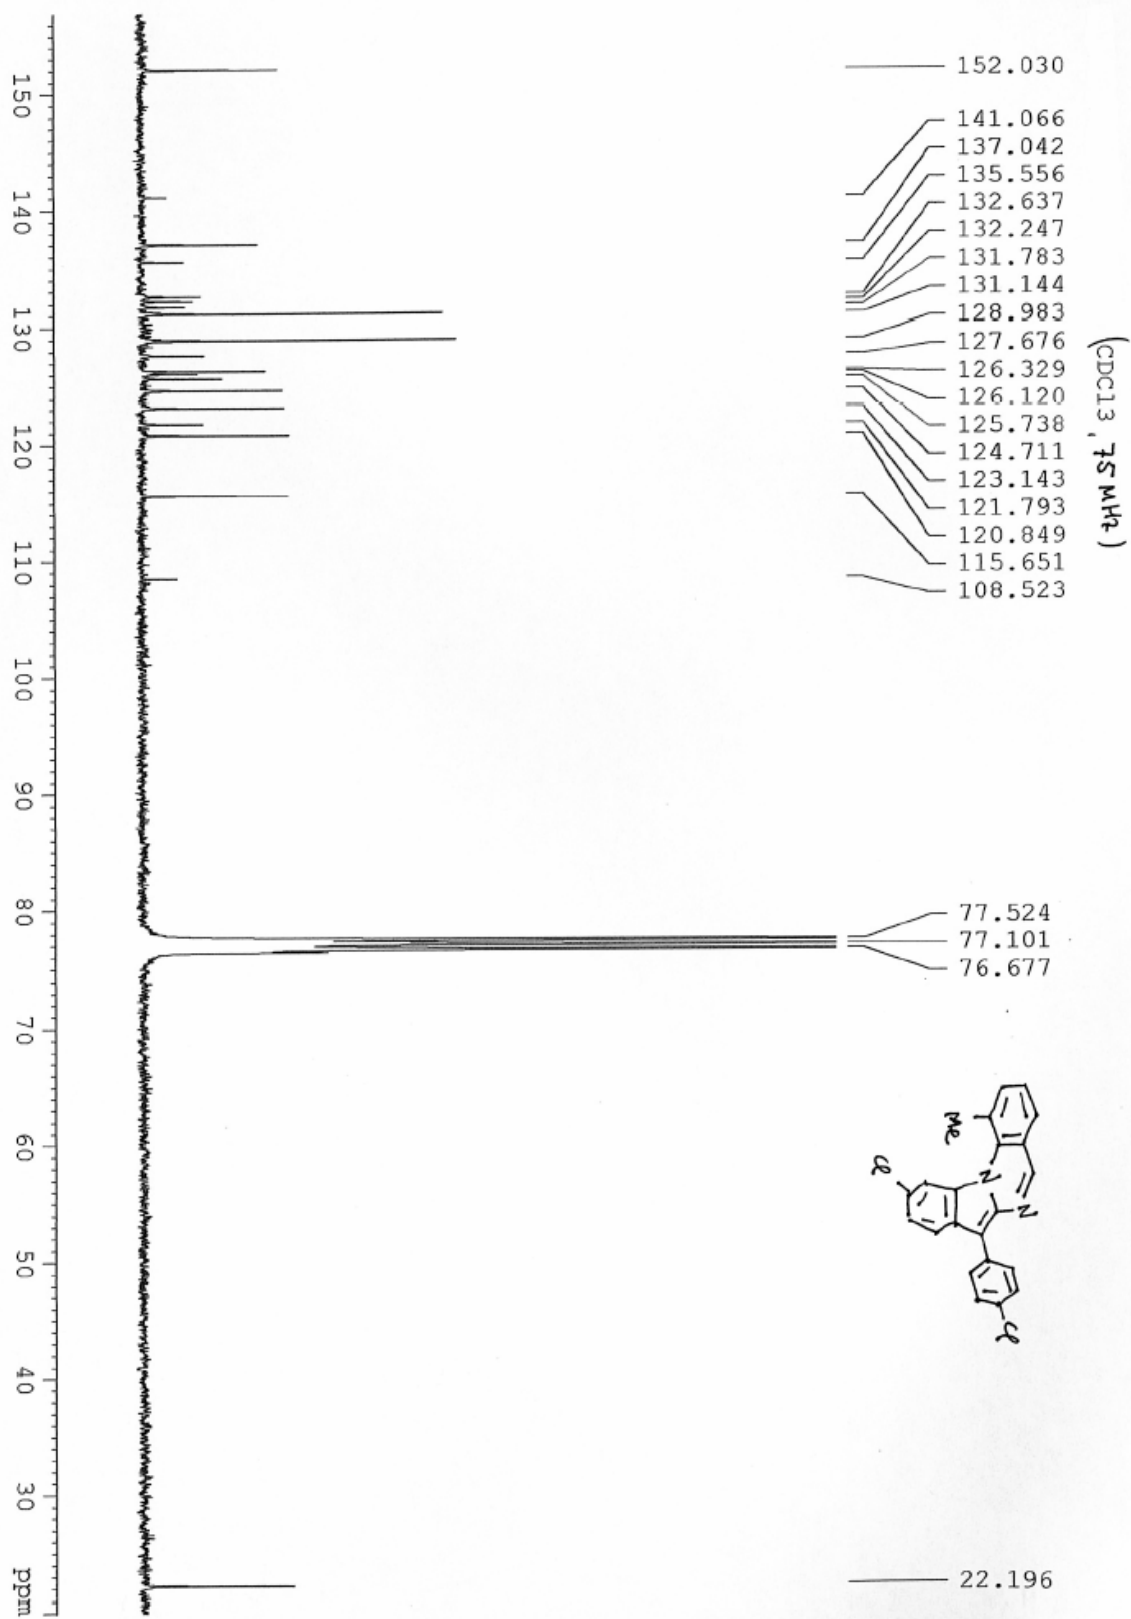

$^1\text{H}$  NMR of **4j**

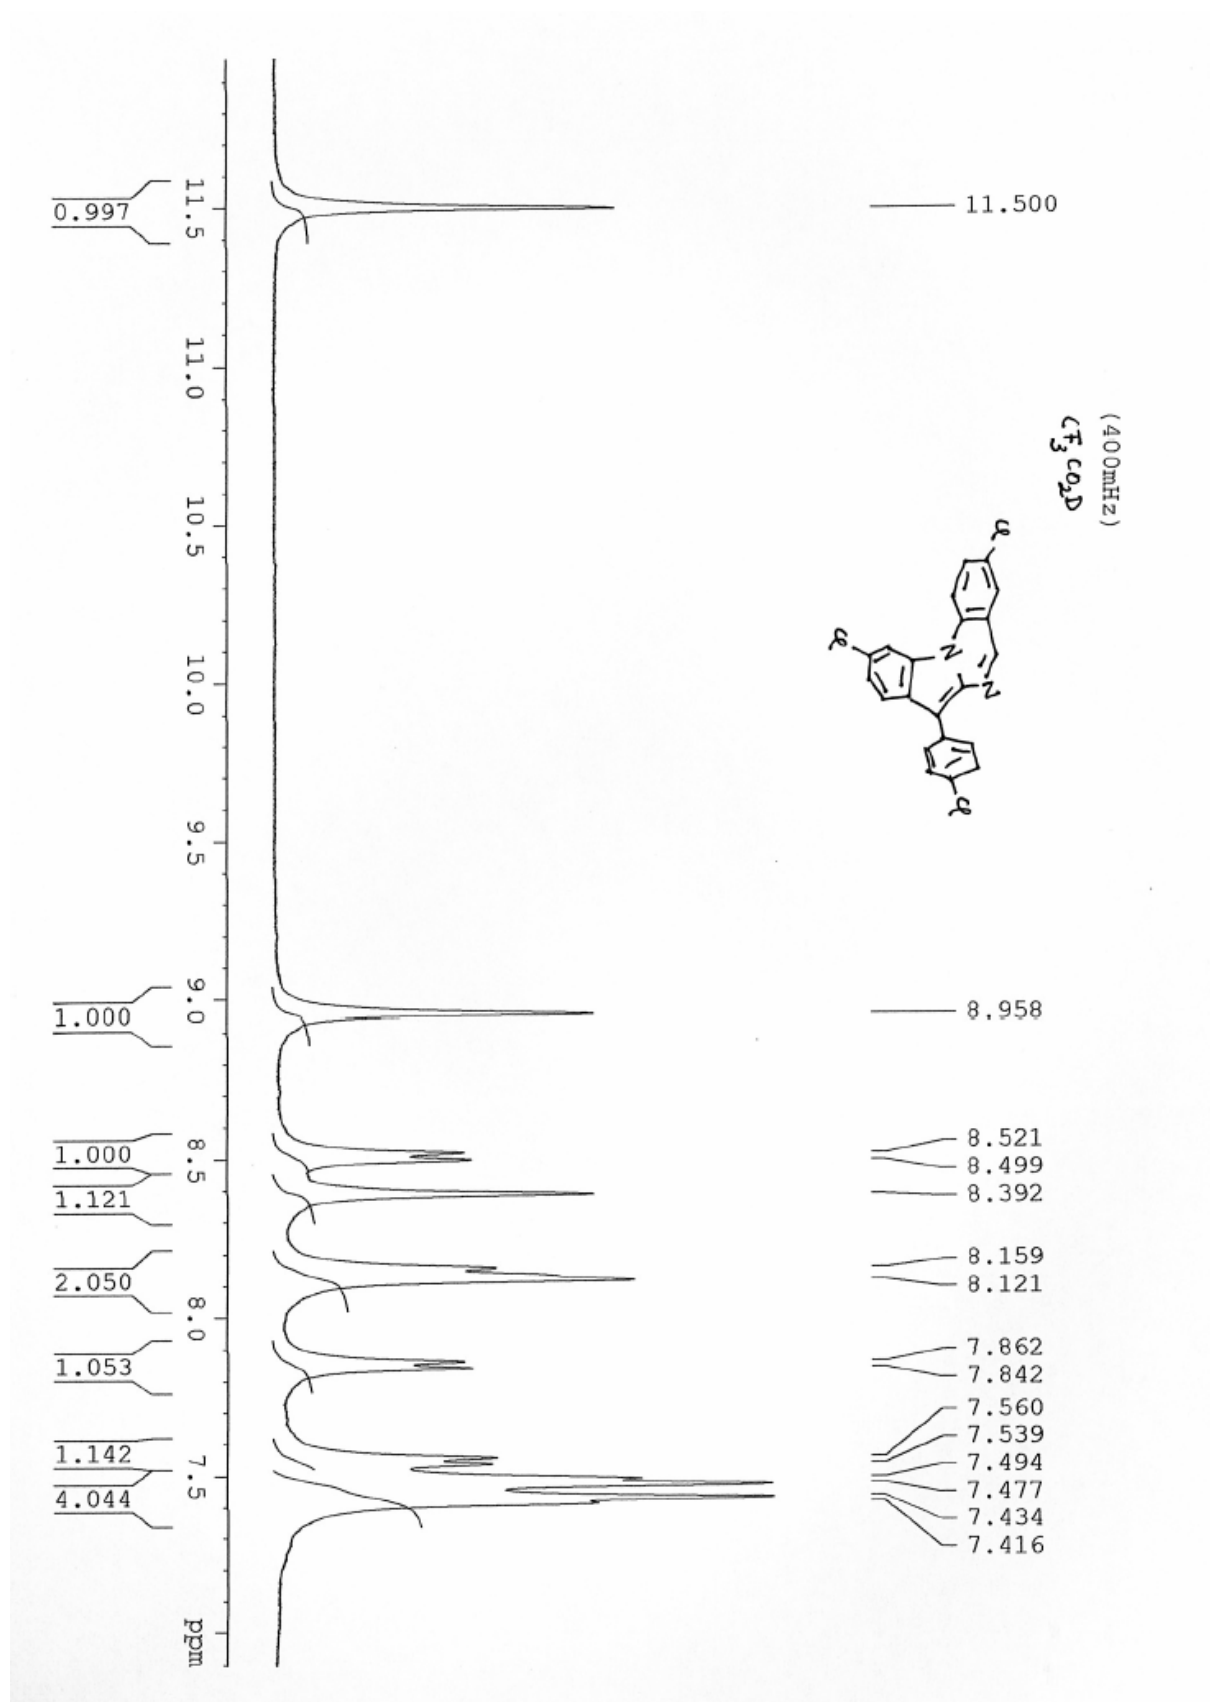

$^{13}\text{C}$  NMR of 4j

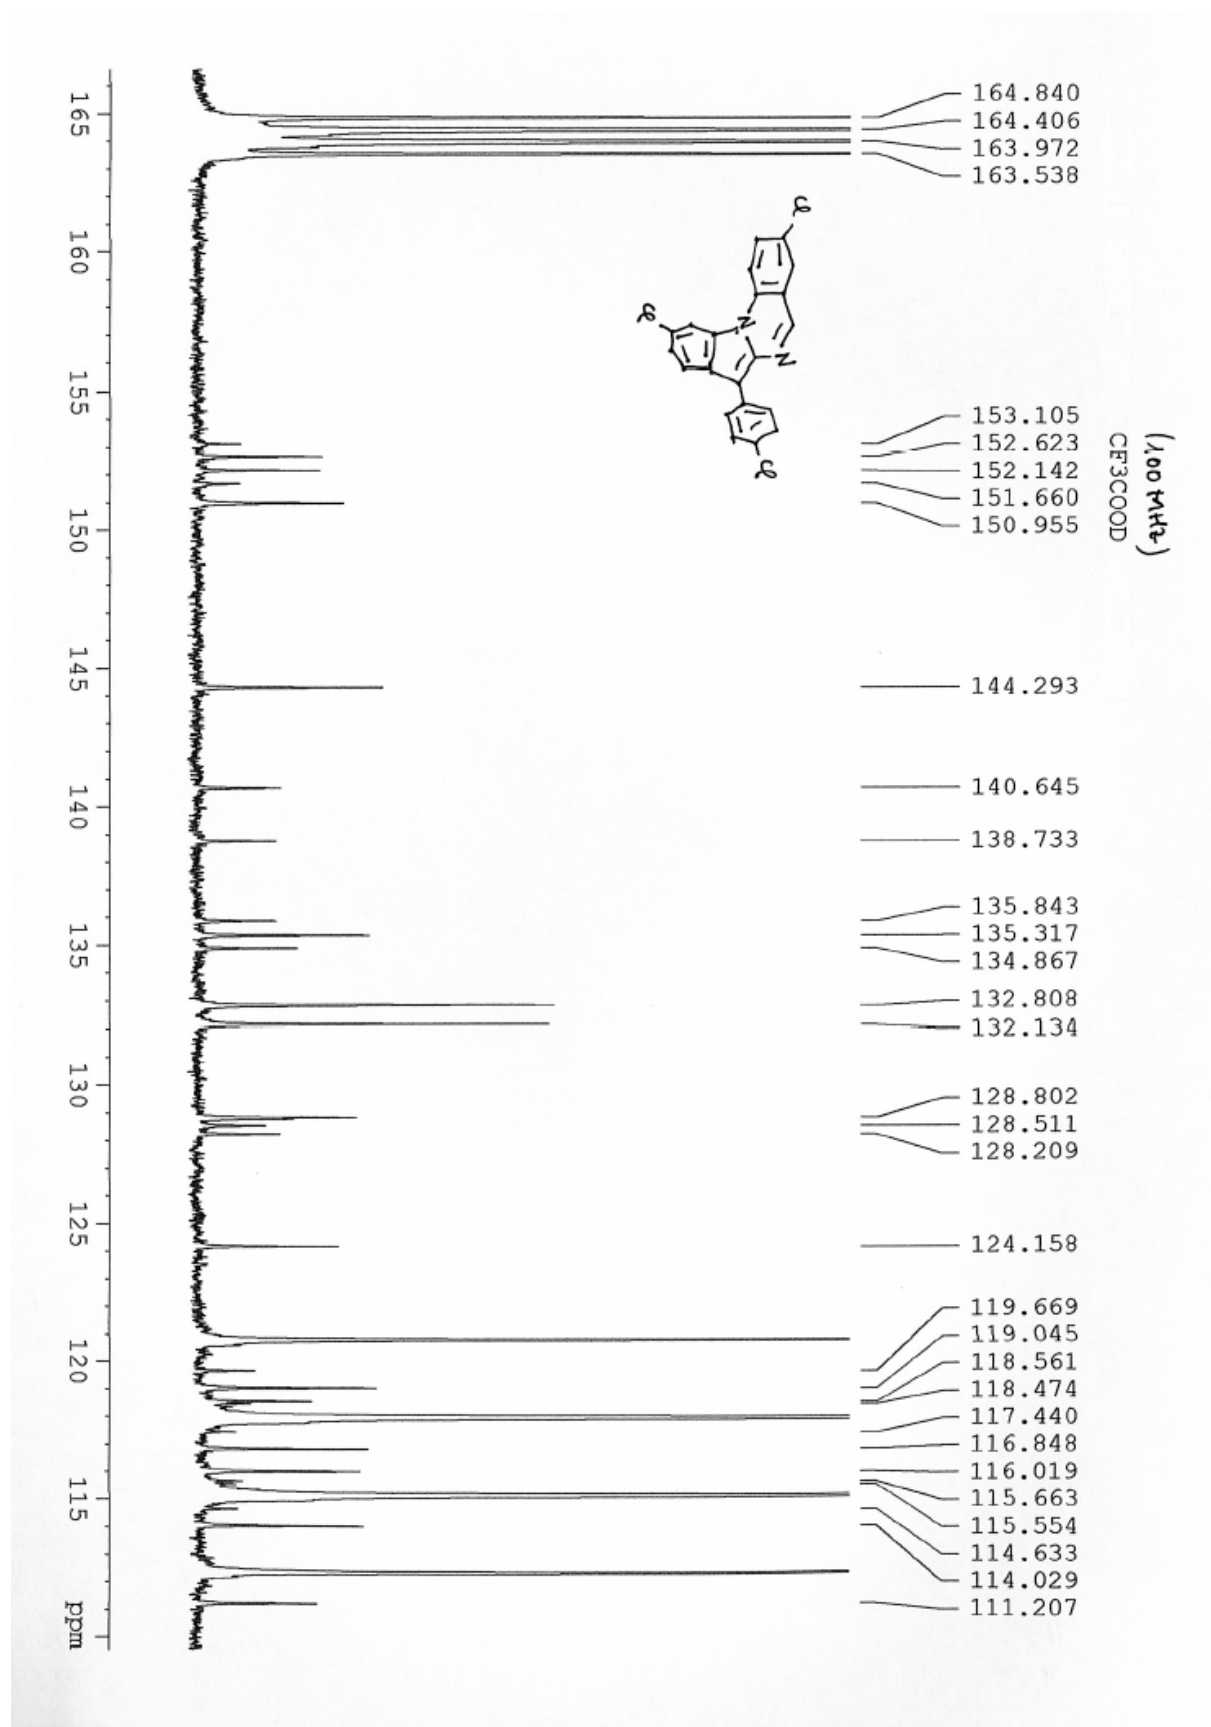

$^1\text{H}$  NMR of **4k**

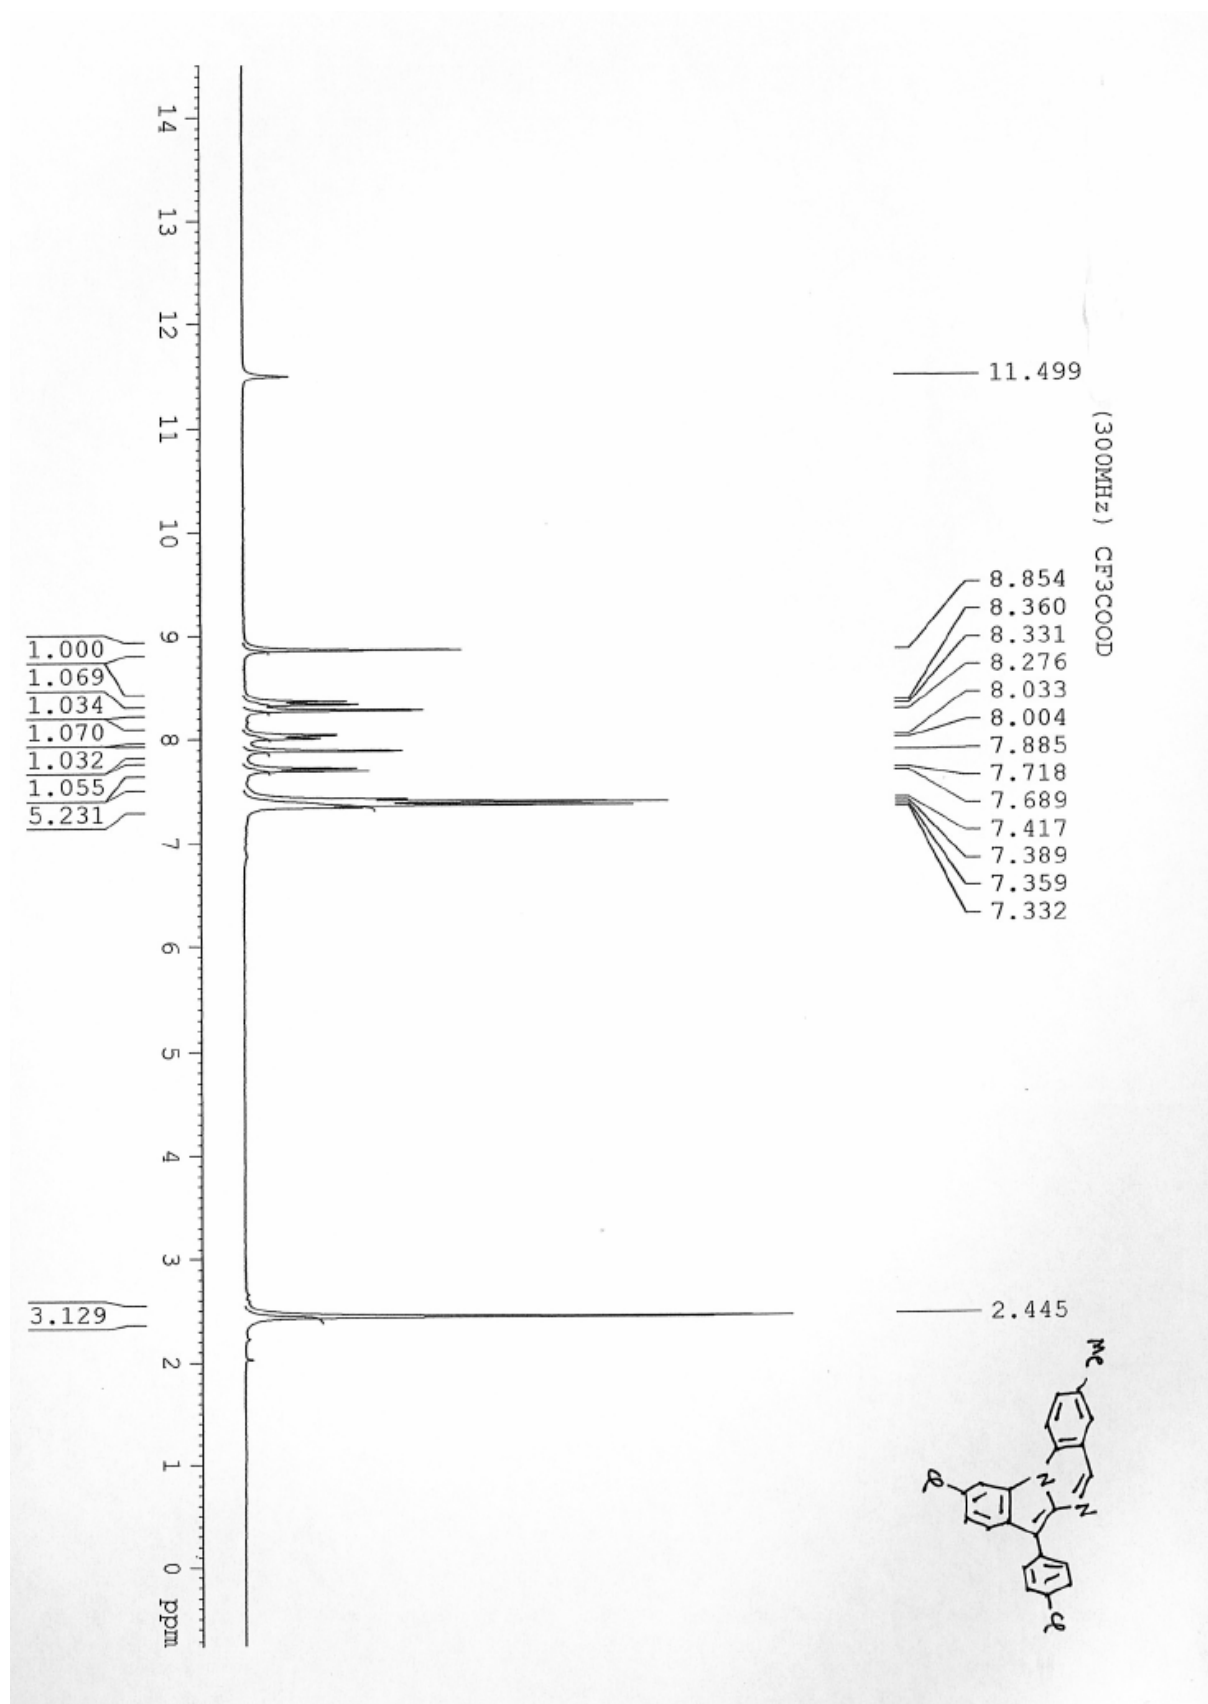

$^{13}\text{C}$  NMR of **4k**

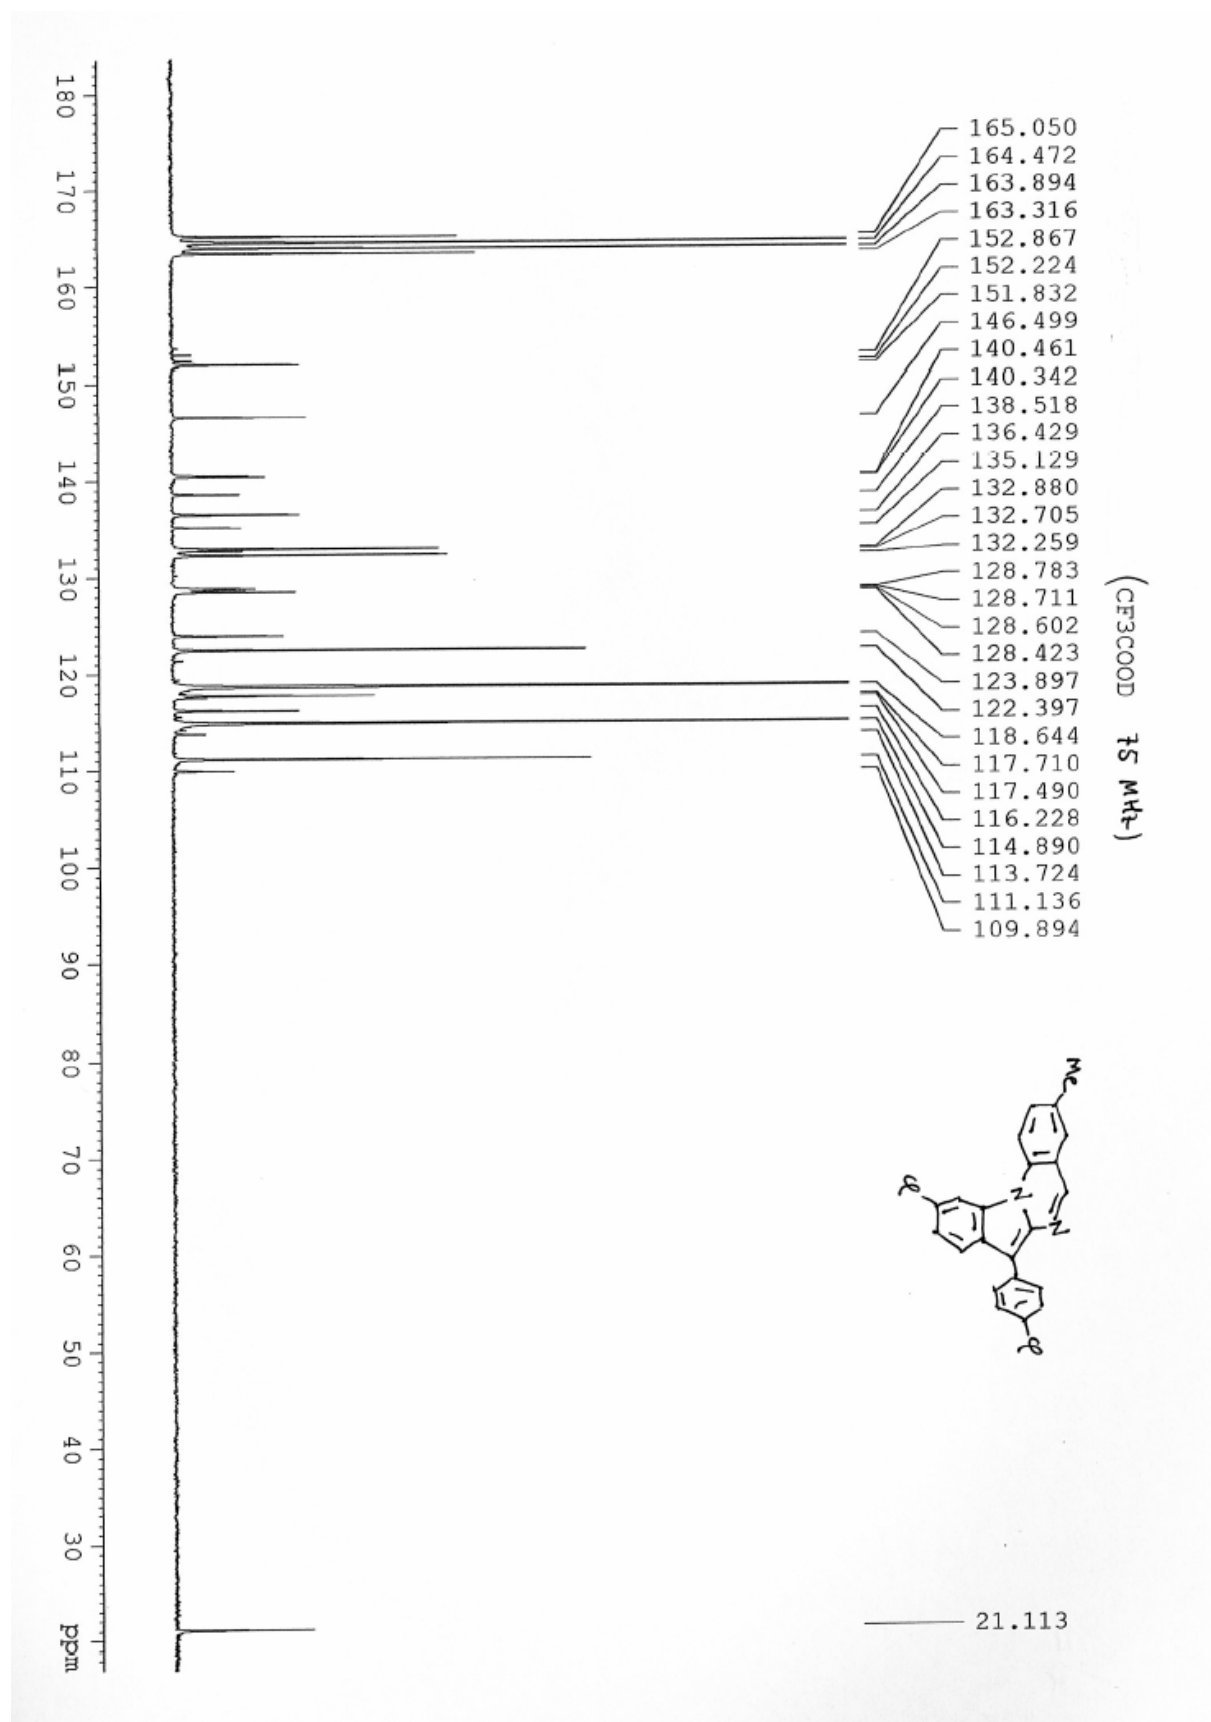



<sup>1</sup>H NMR of **41**

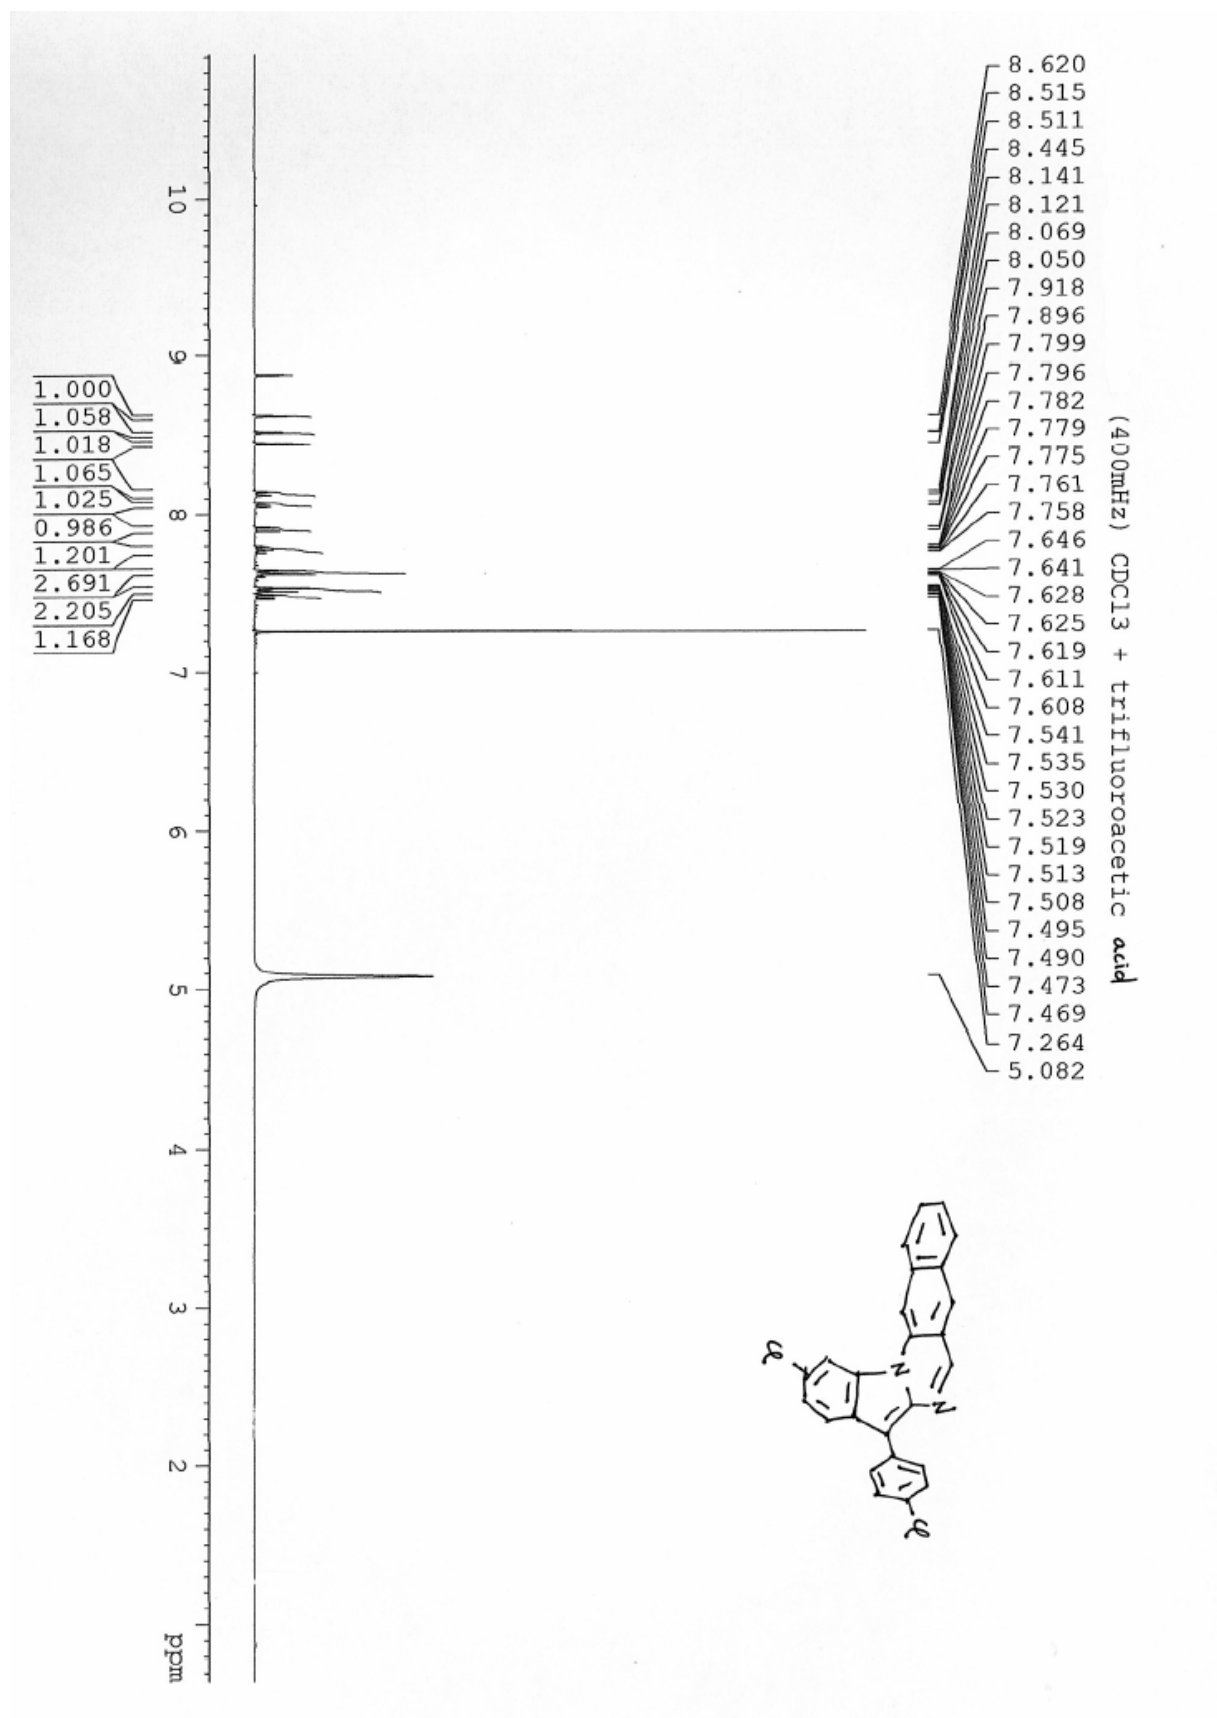



$^{13}\text{C}$  NMR of **4l**

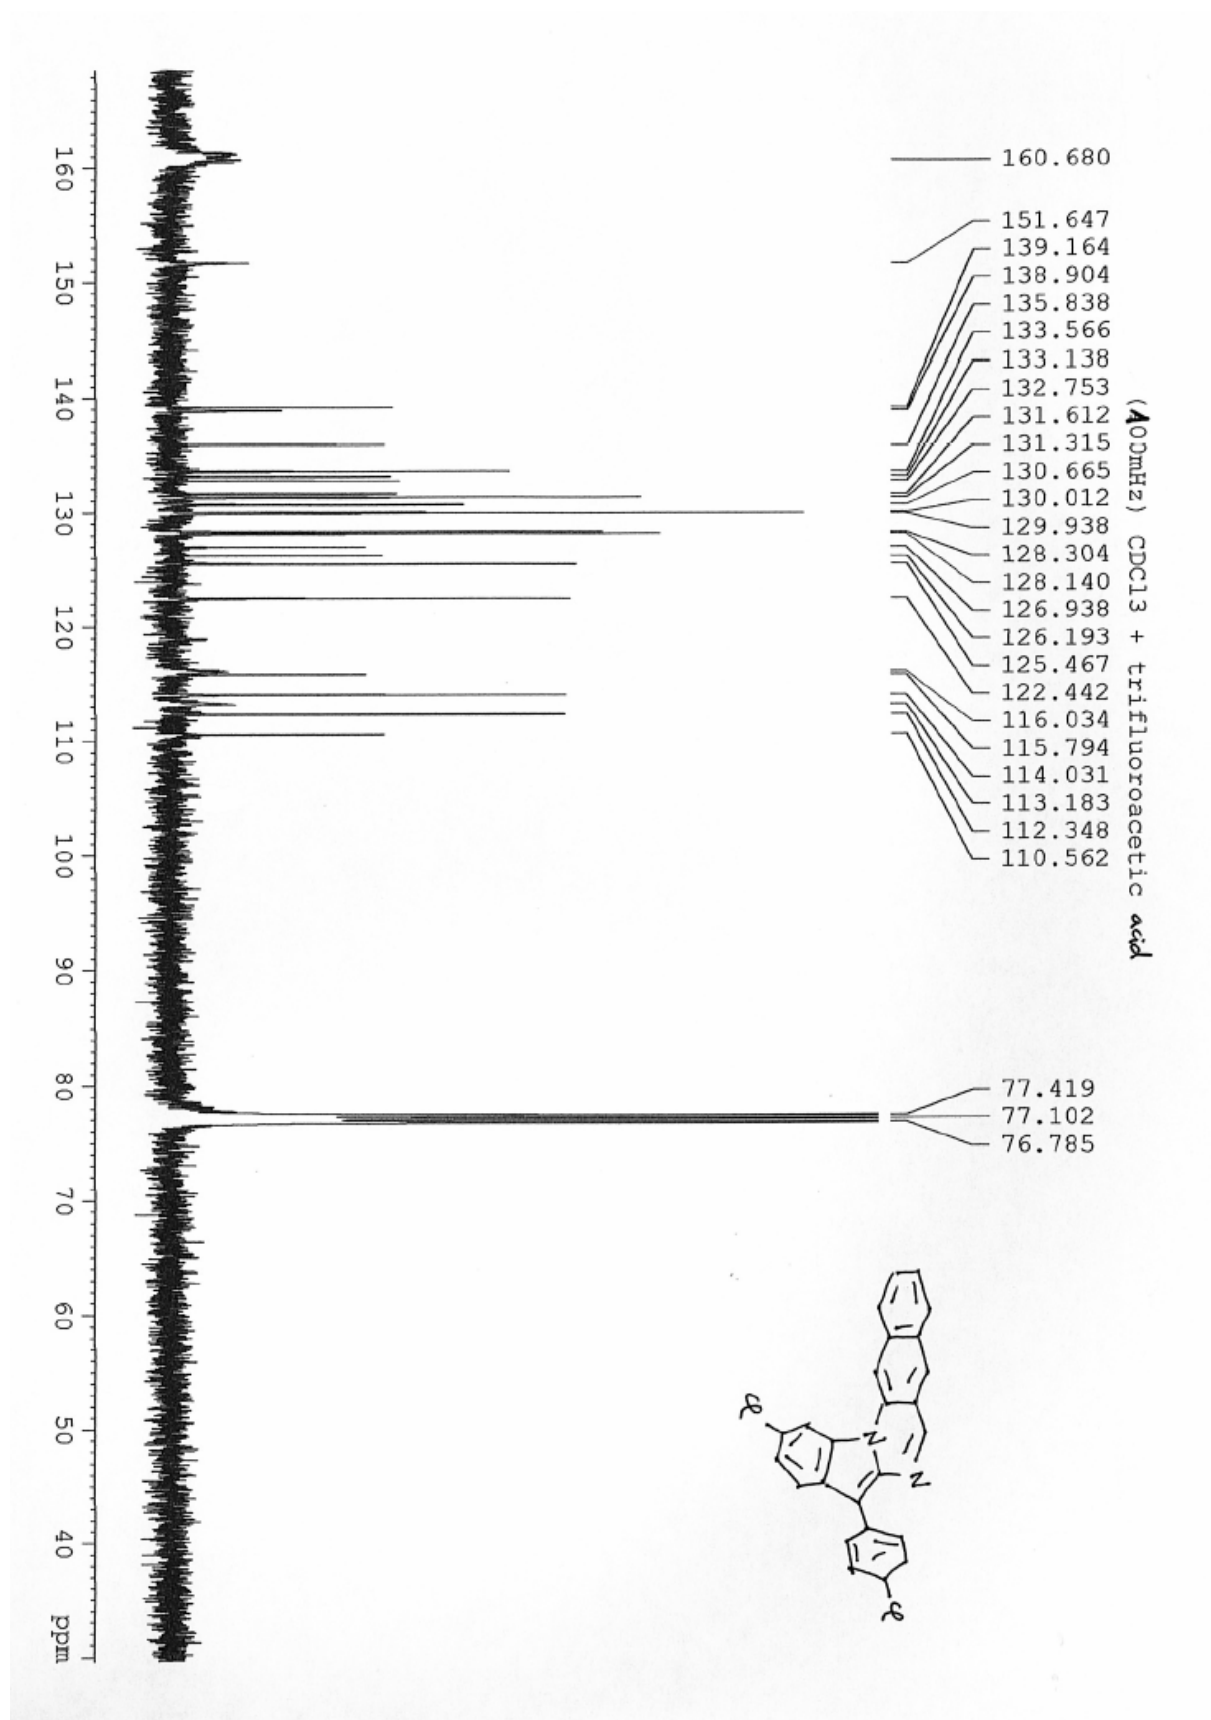

$^1\text{H}$  NMR of **5b**

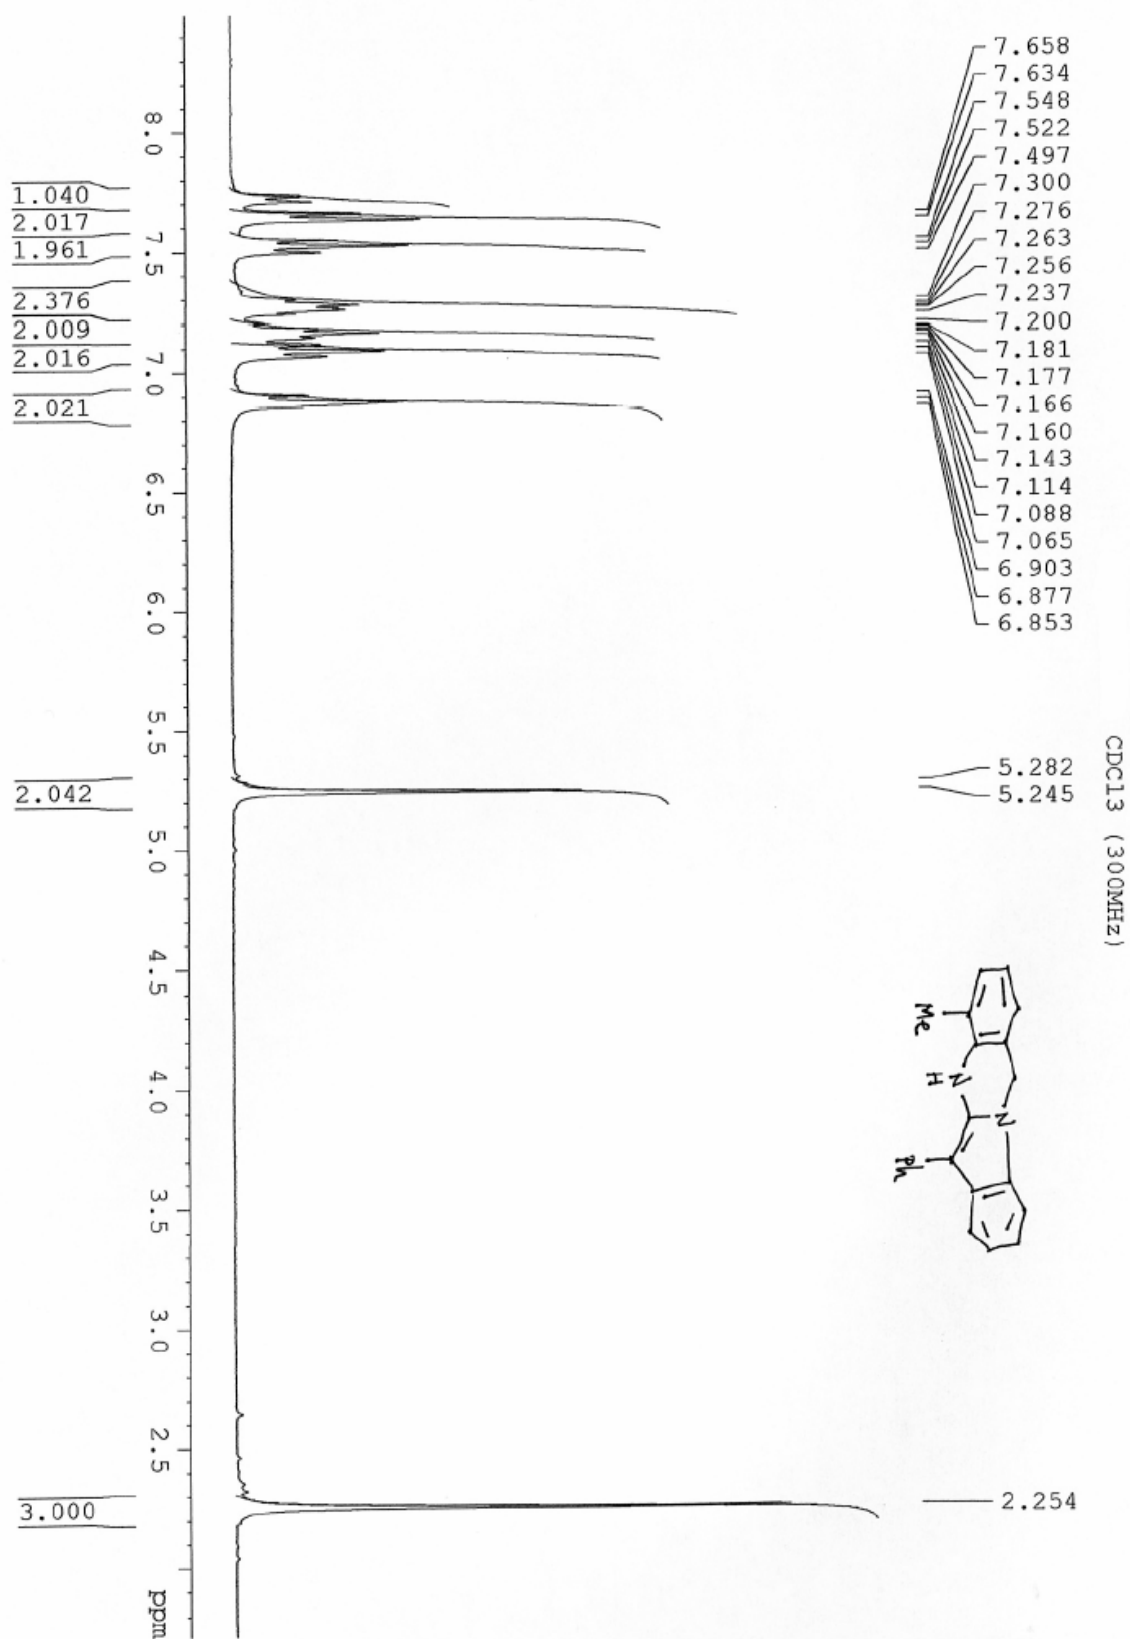

$^{13}\text{C}$  NMR of **5b**

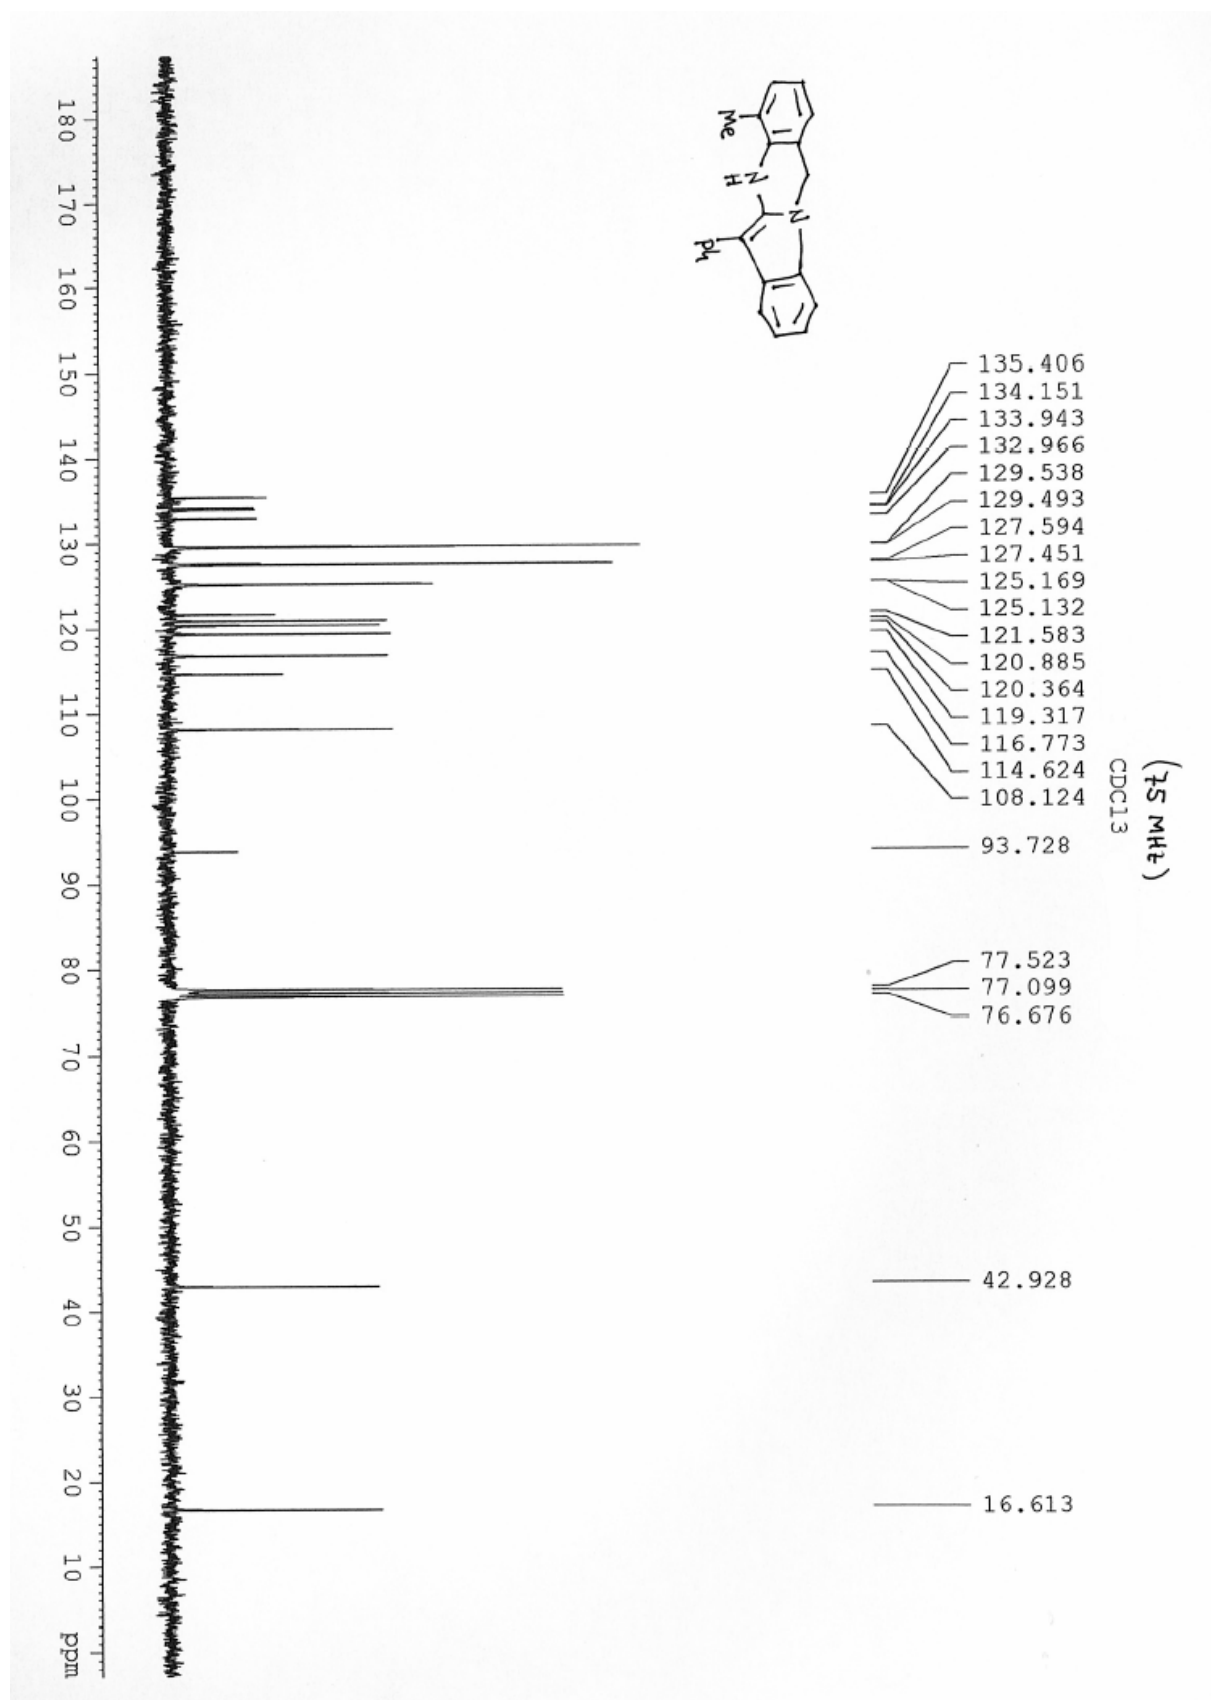

$^1\text{H}$  NMR of **5i**

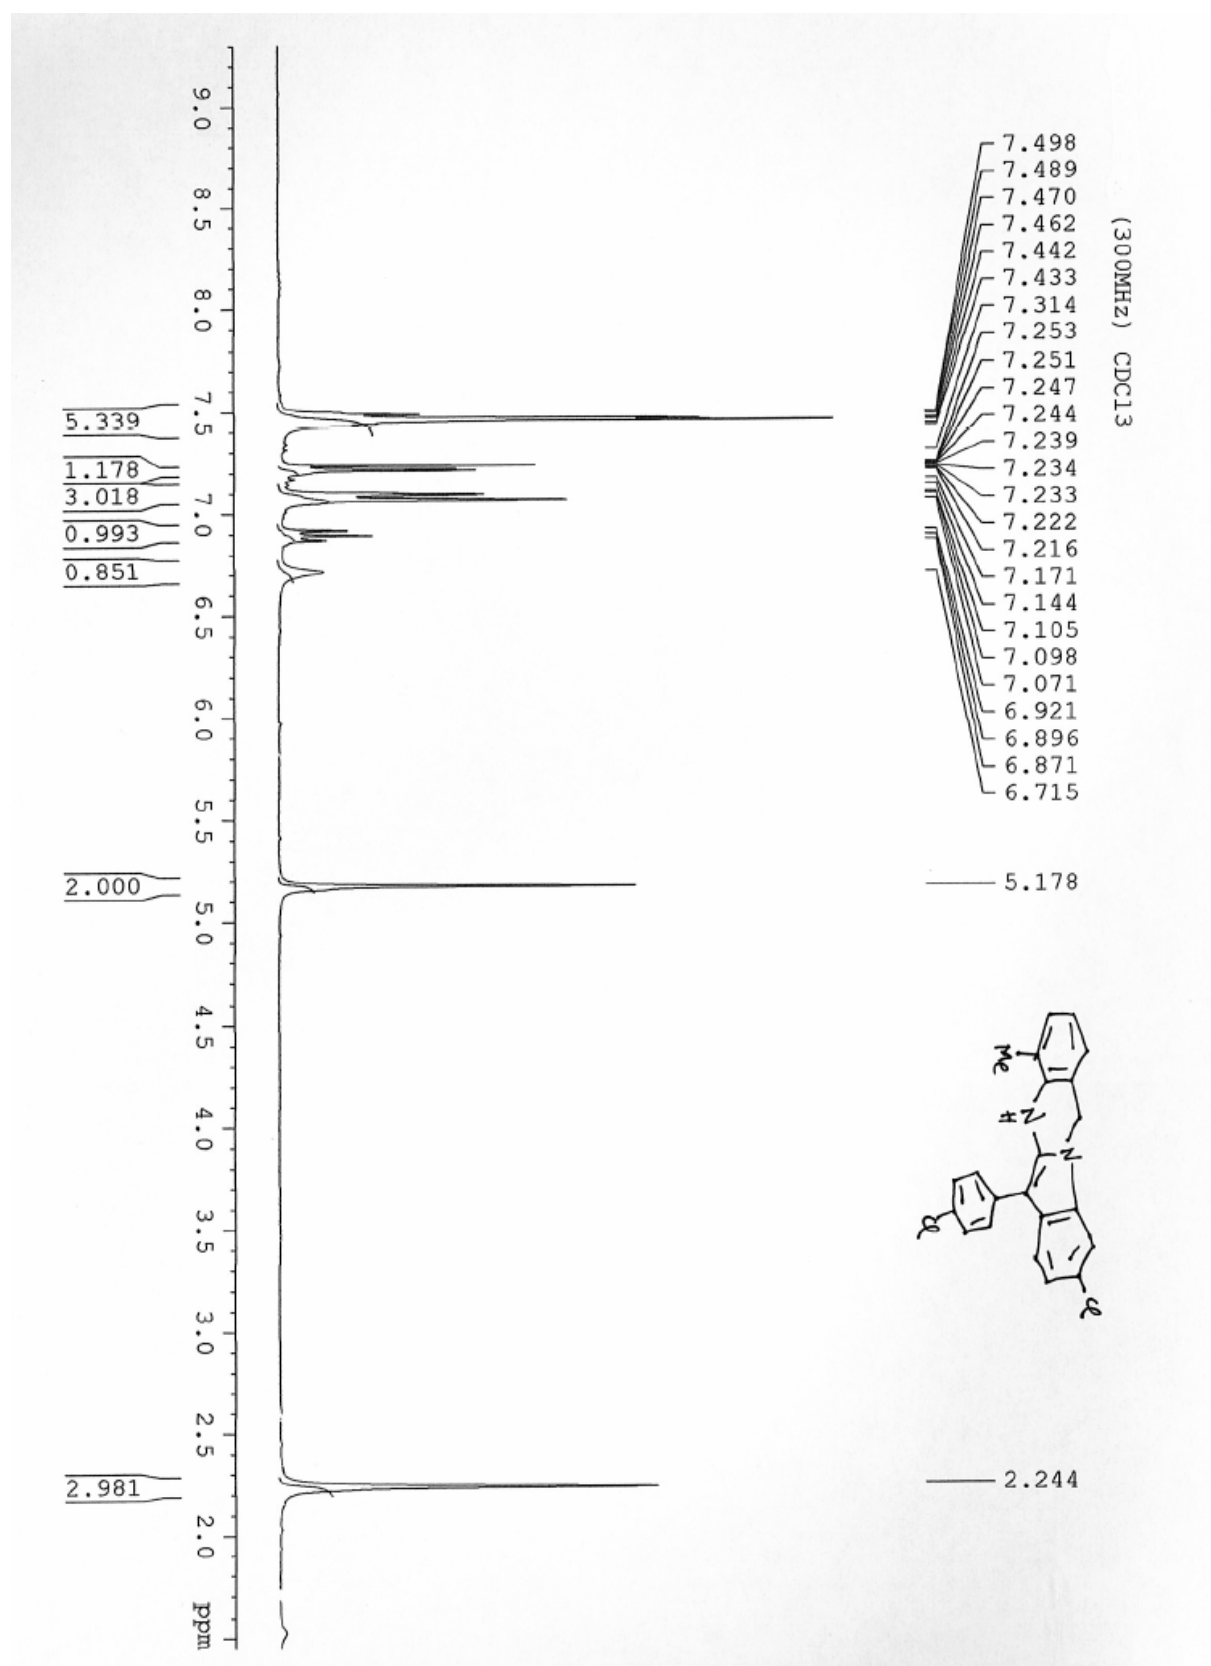

$^{13}\text{C}$  NMR of **5i**

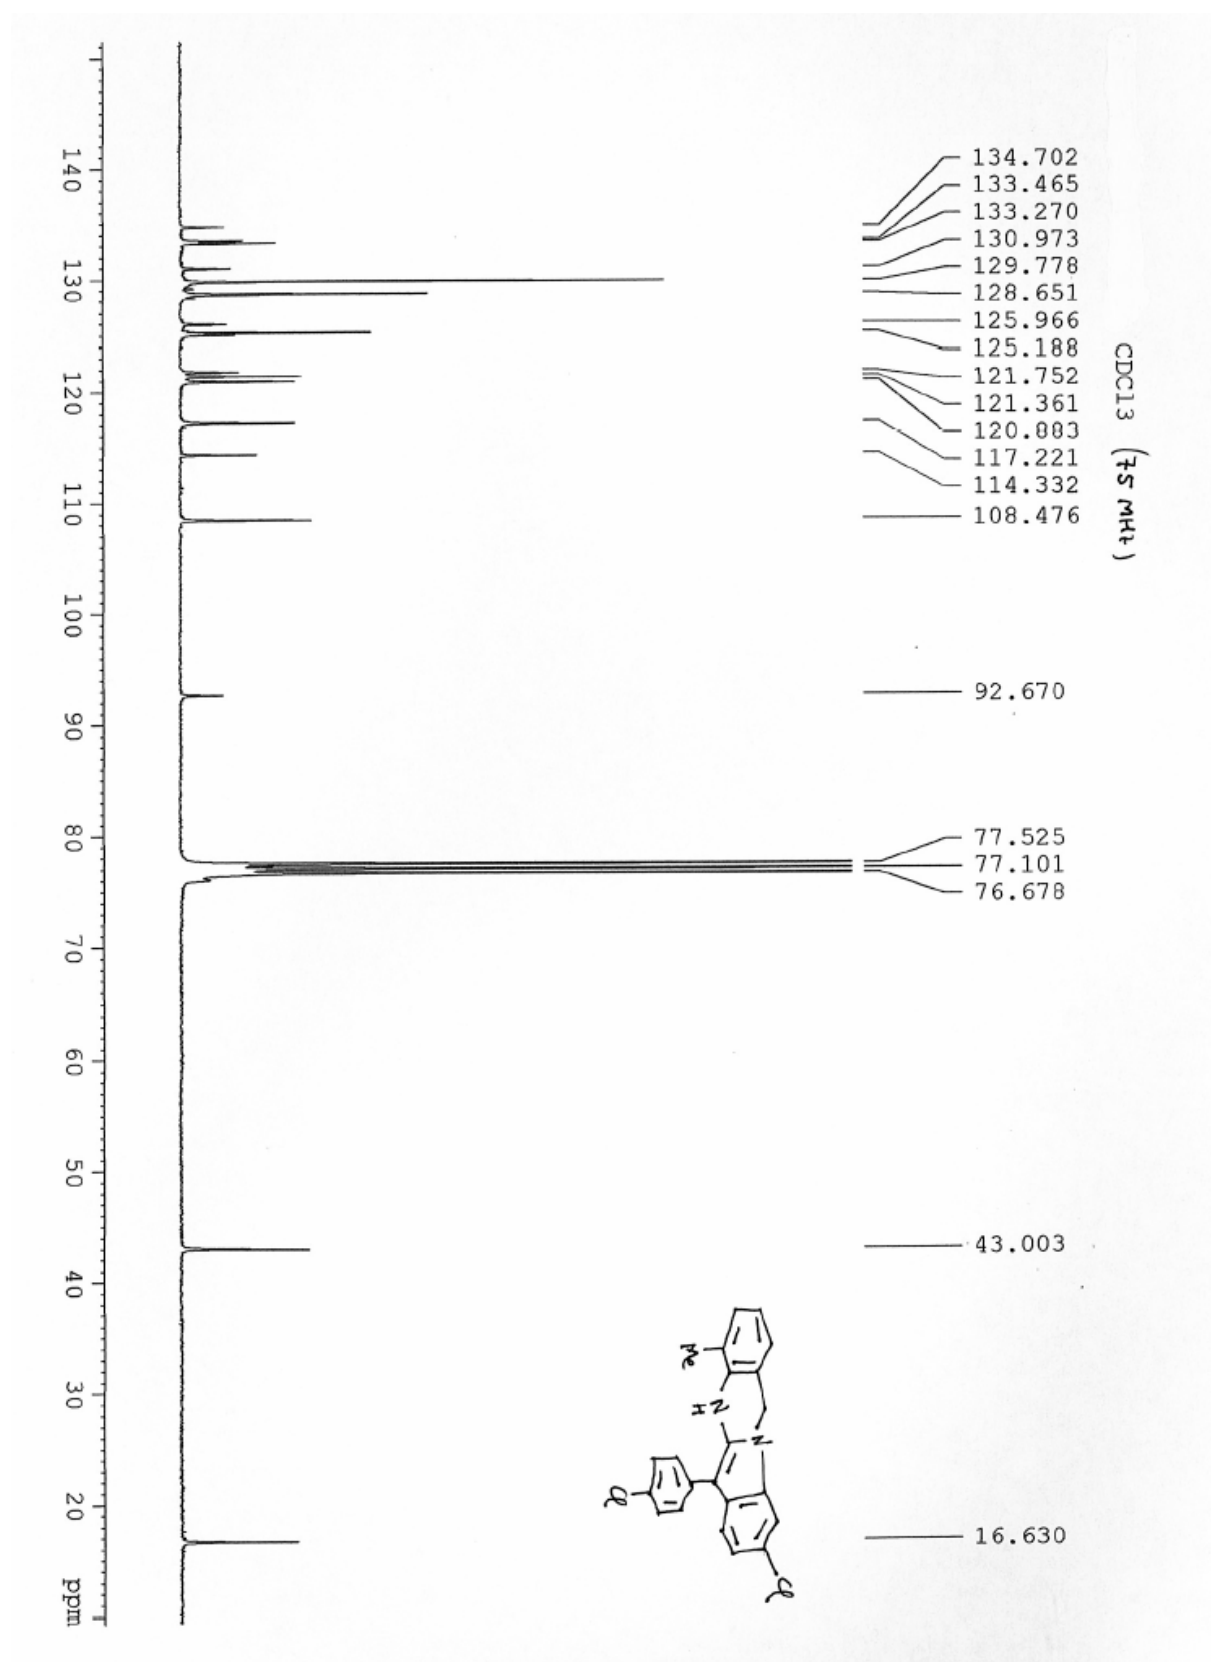

<sup>1</sup>H NMR of 12

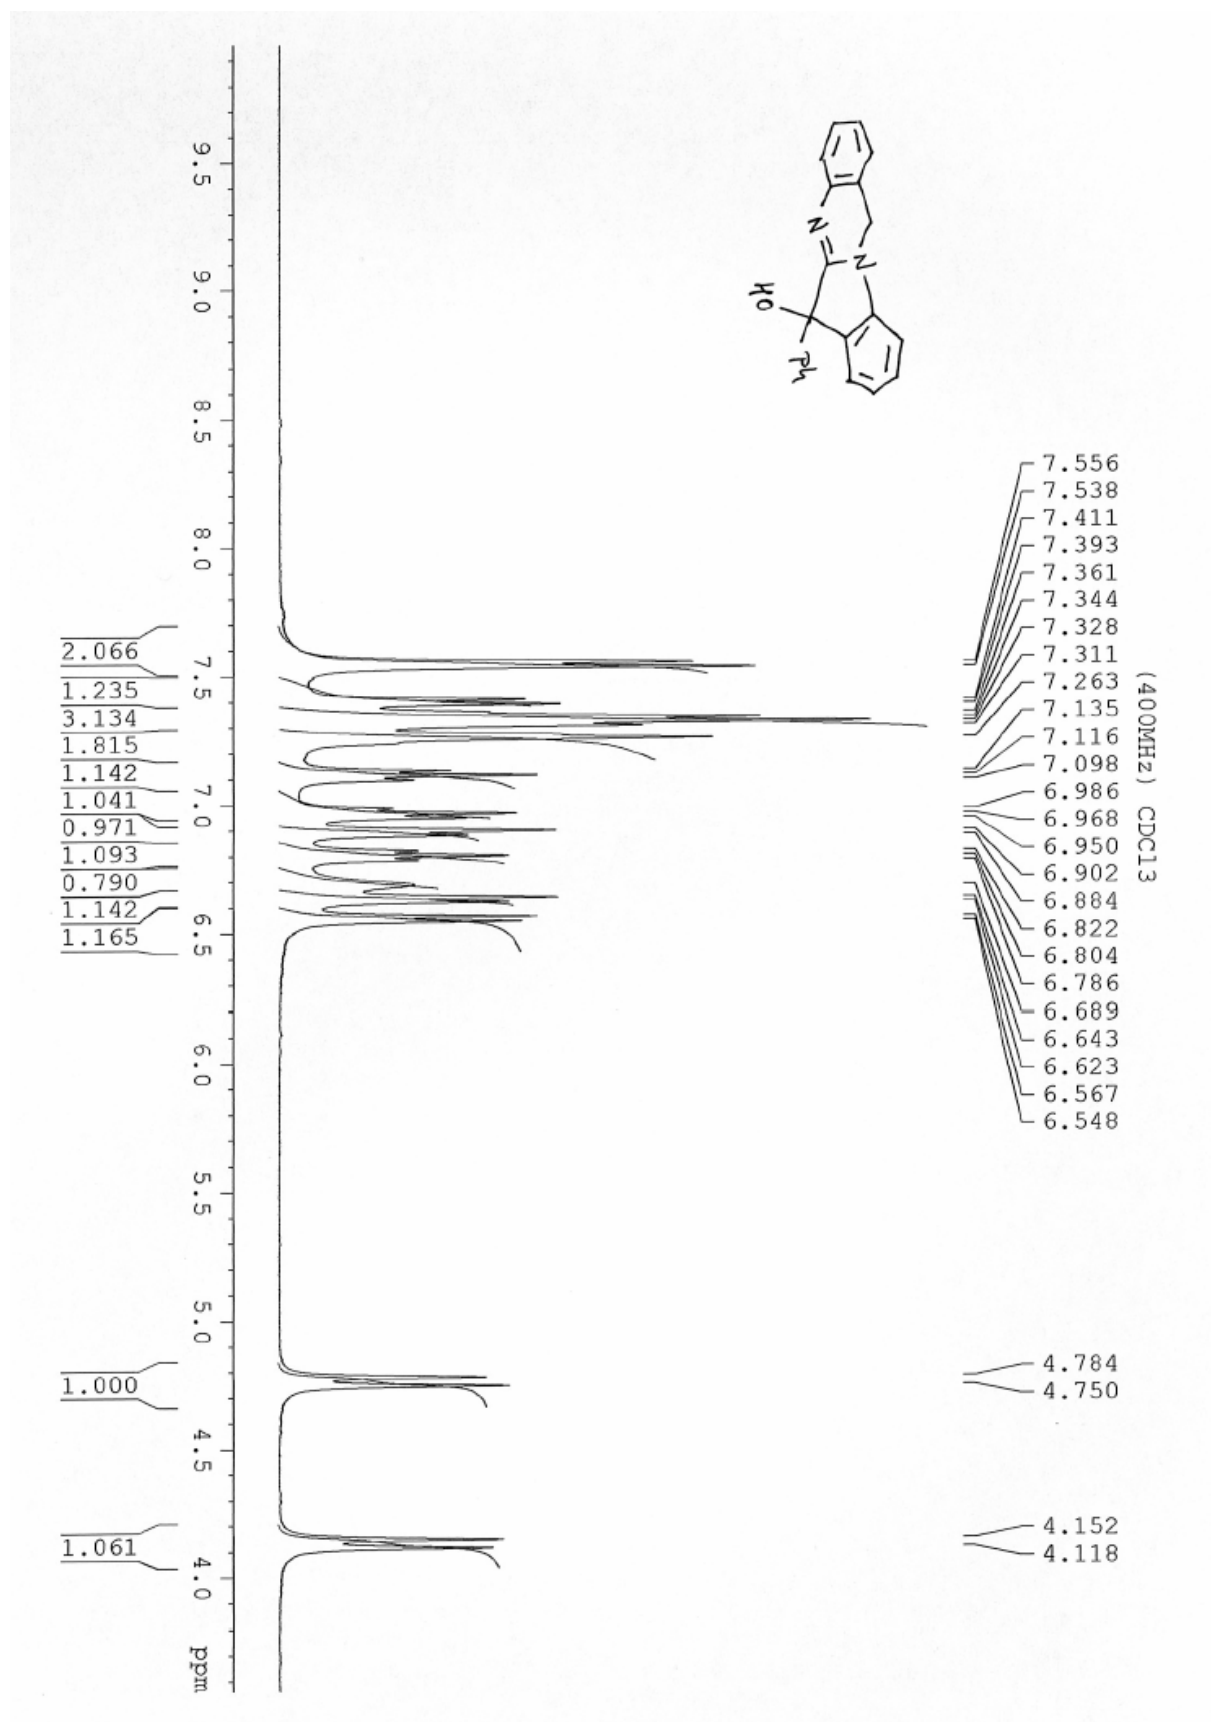



$^{13}\text{C}$  NMR of 12

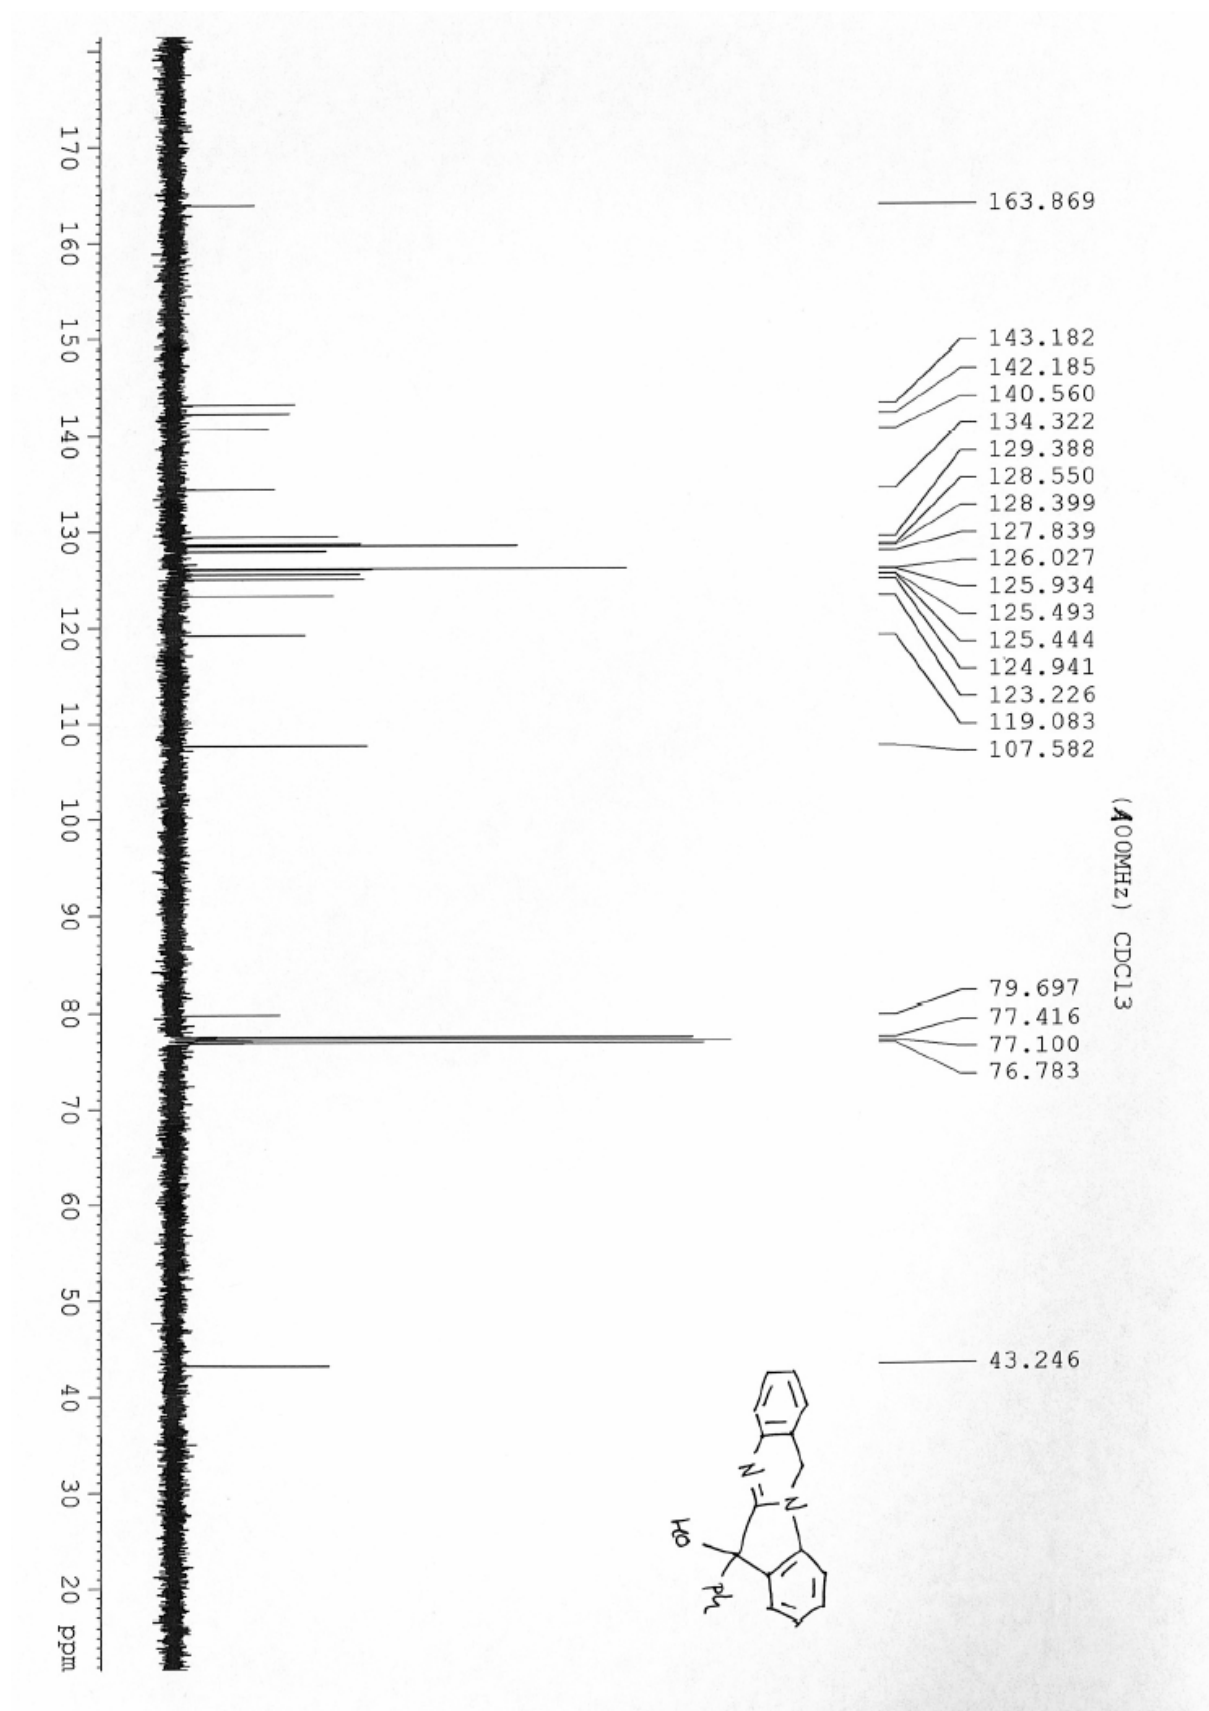

$^1\text{H}$  NMR of **14a**

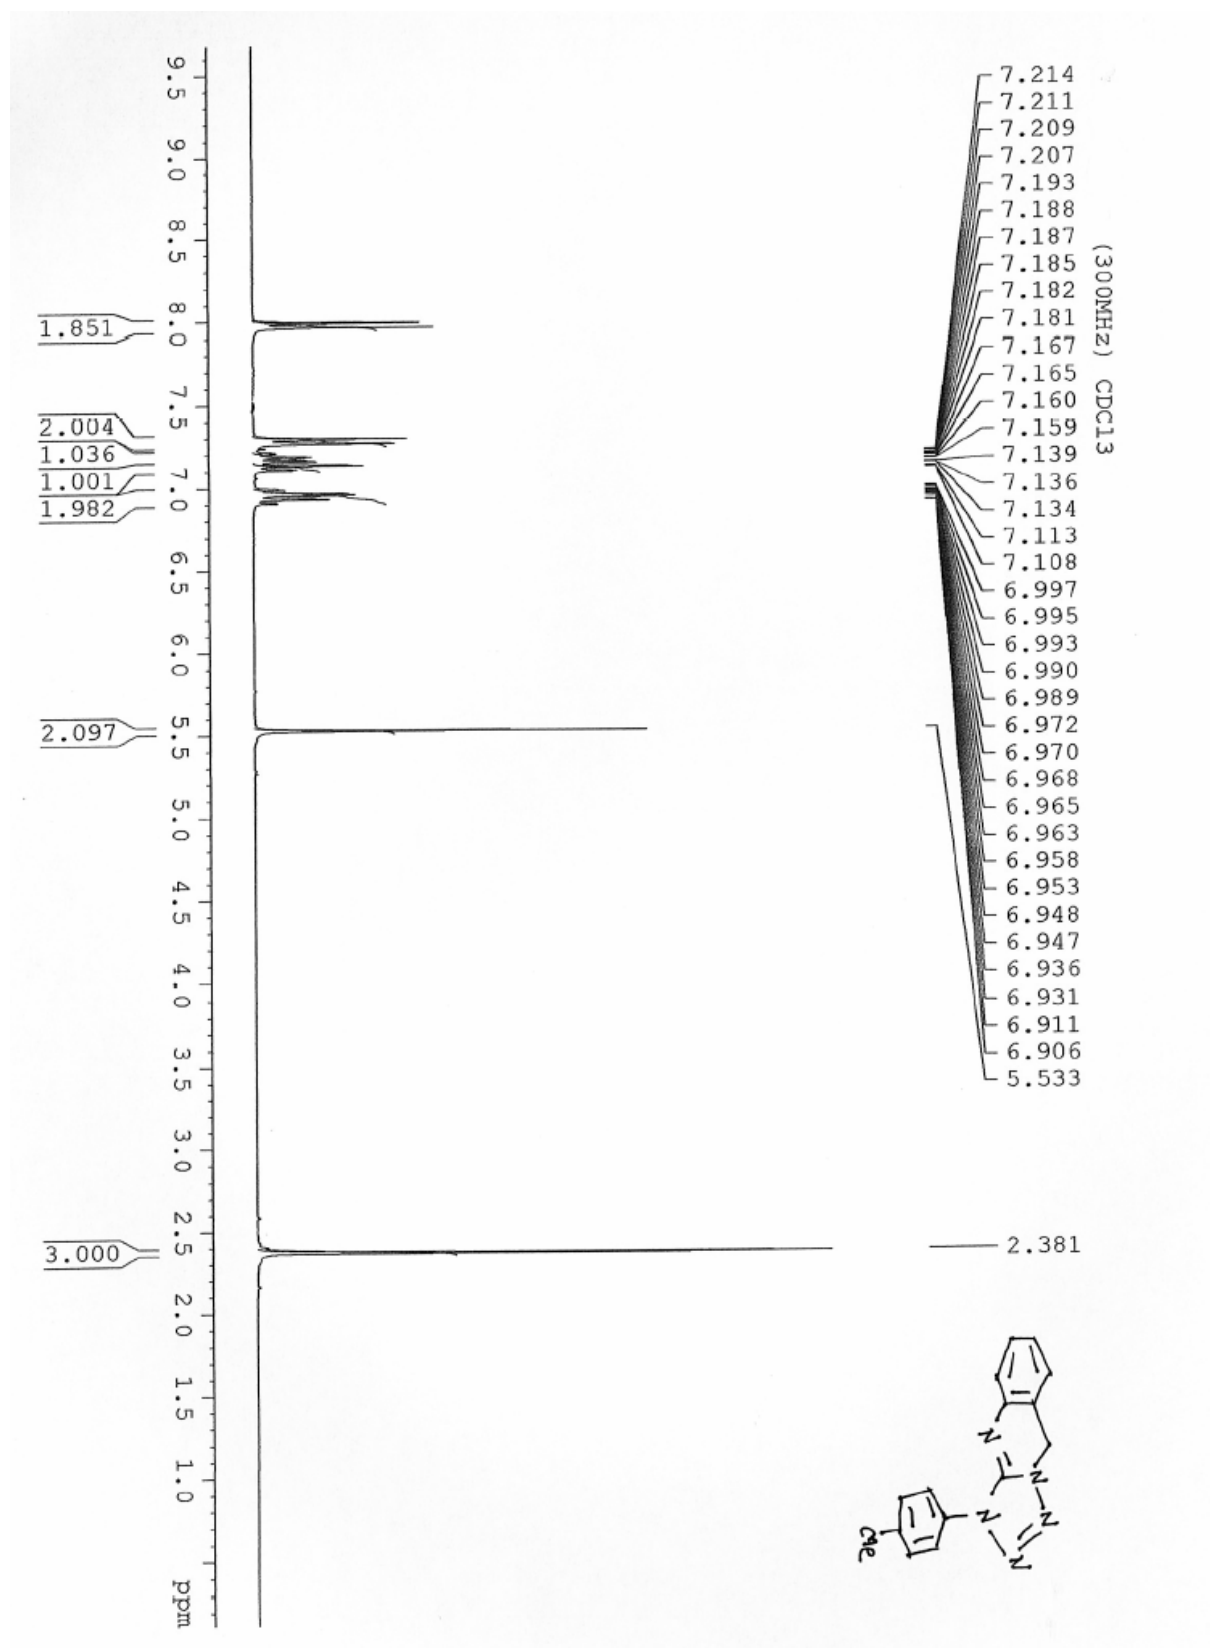



<sup>13</sup>C NMR of 14a

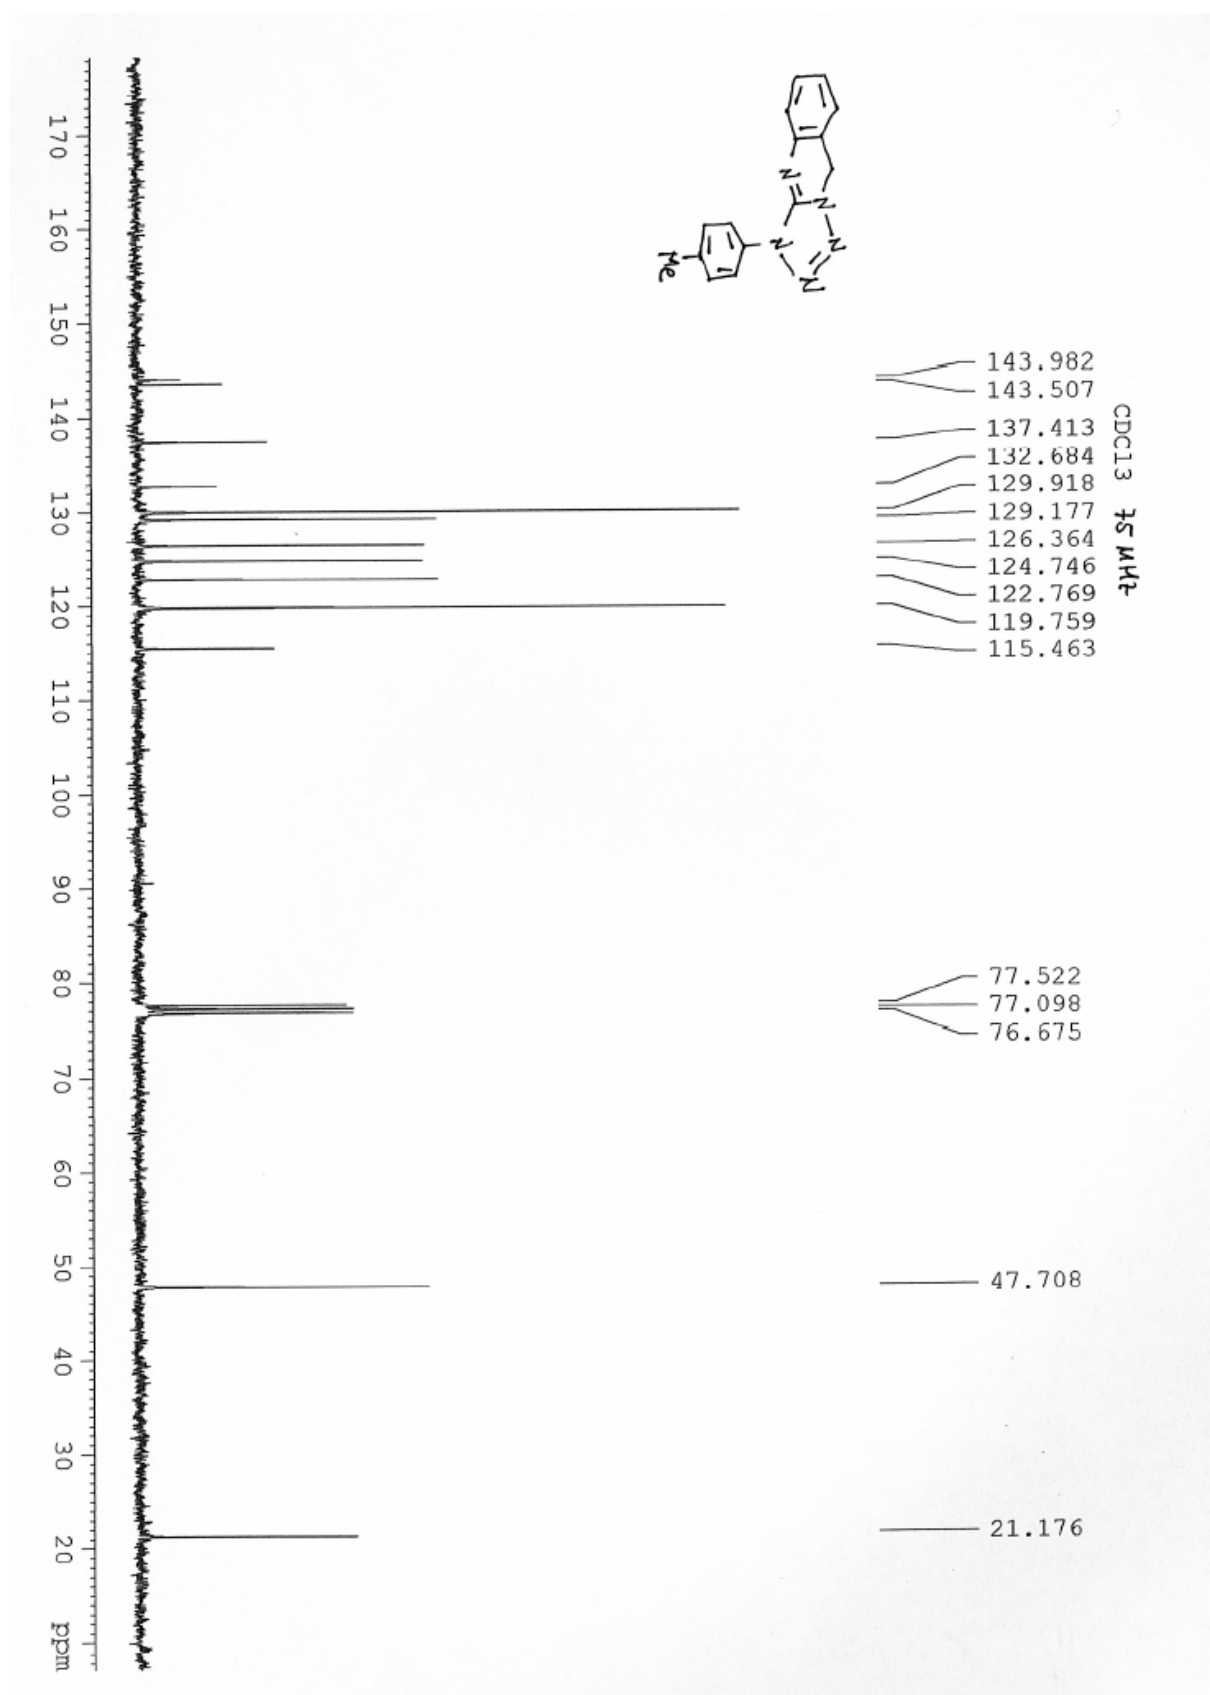

$^1\text{H}$  NMR of **14b**

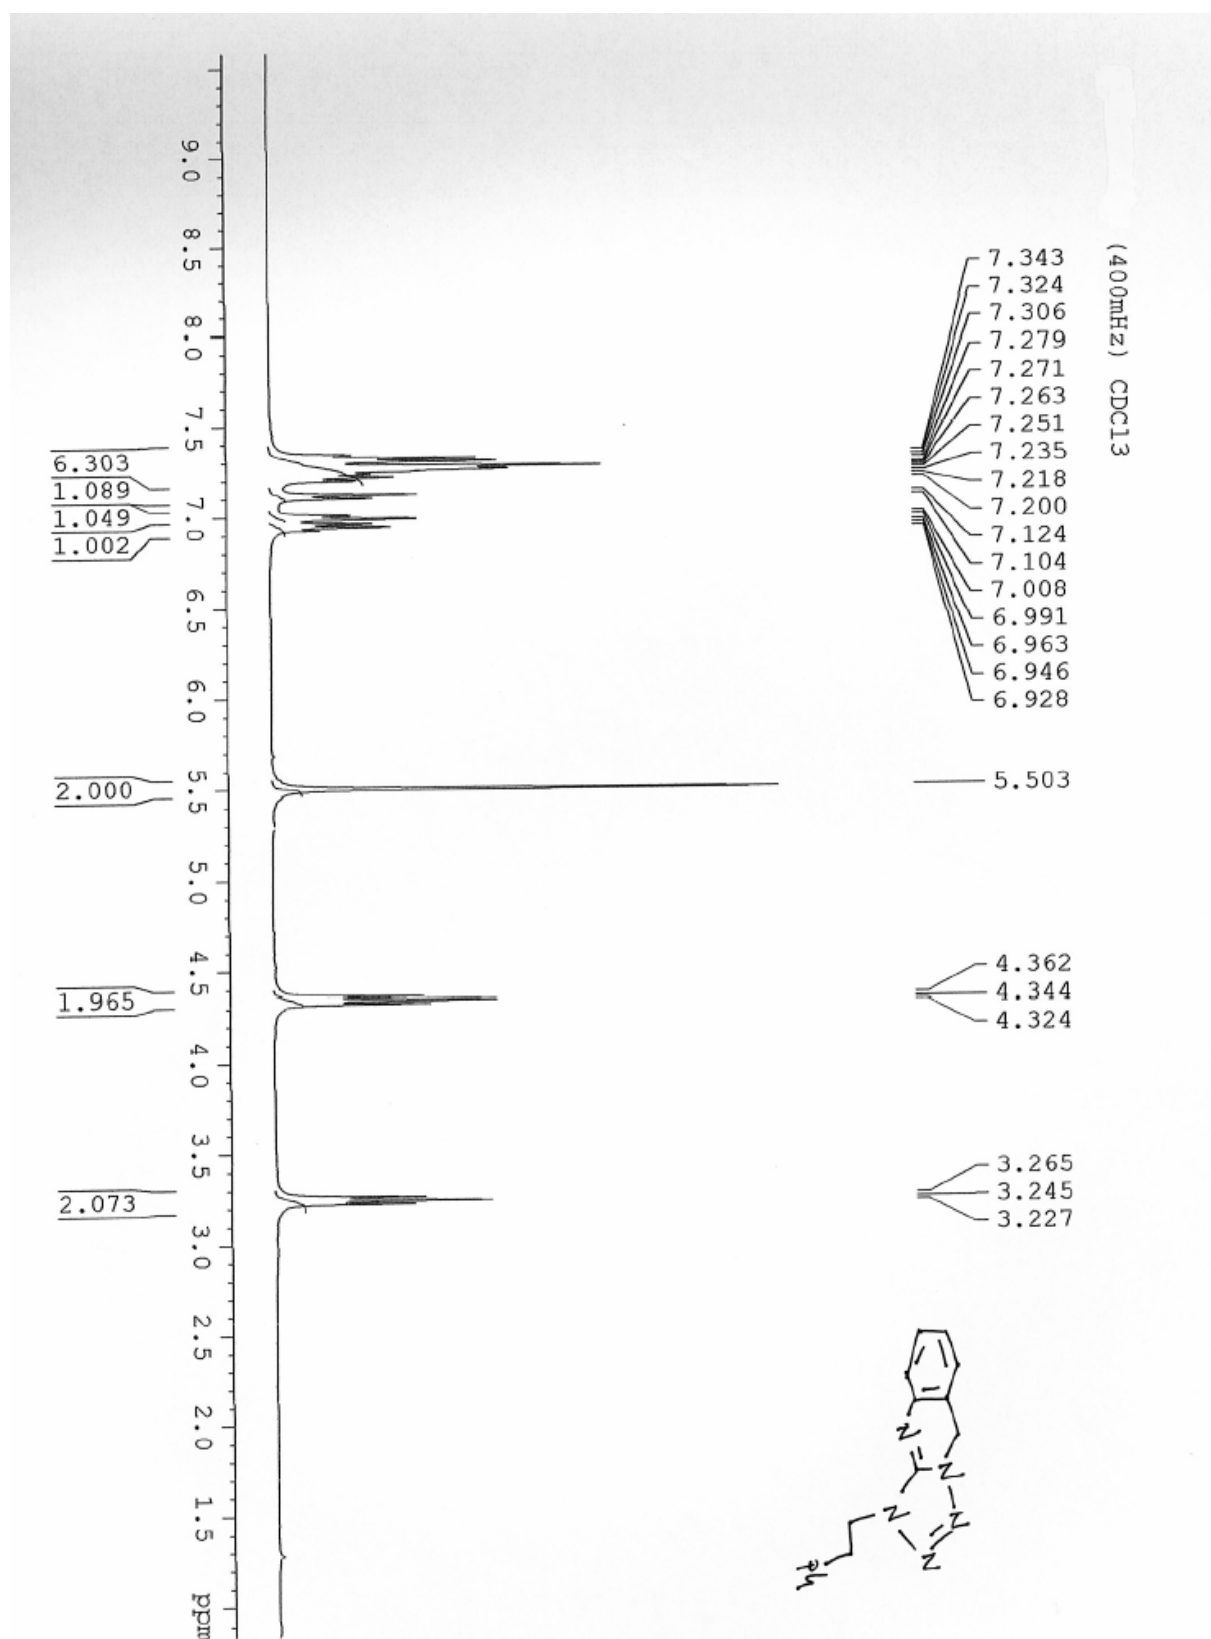

$^{13}\text{C}$  NMR of **14b**

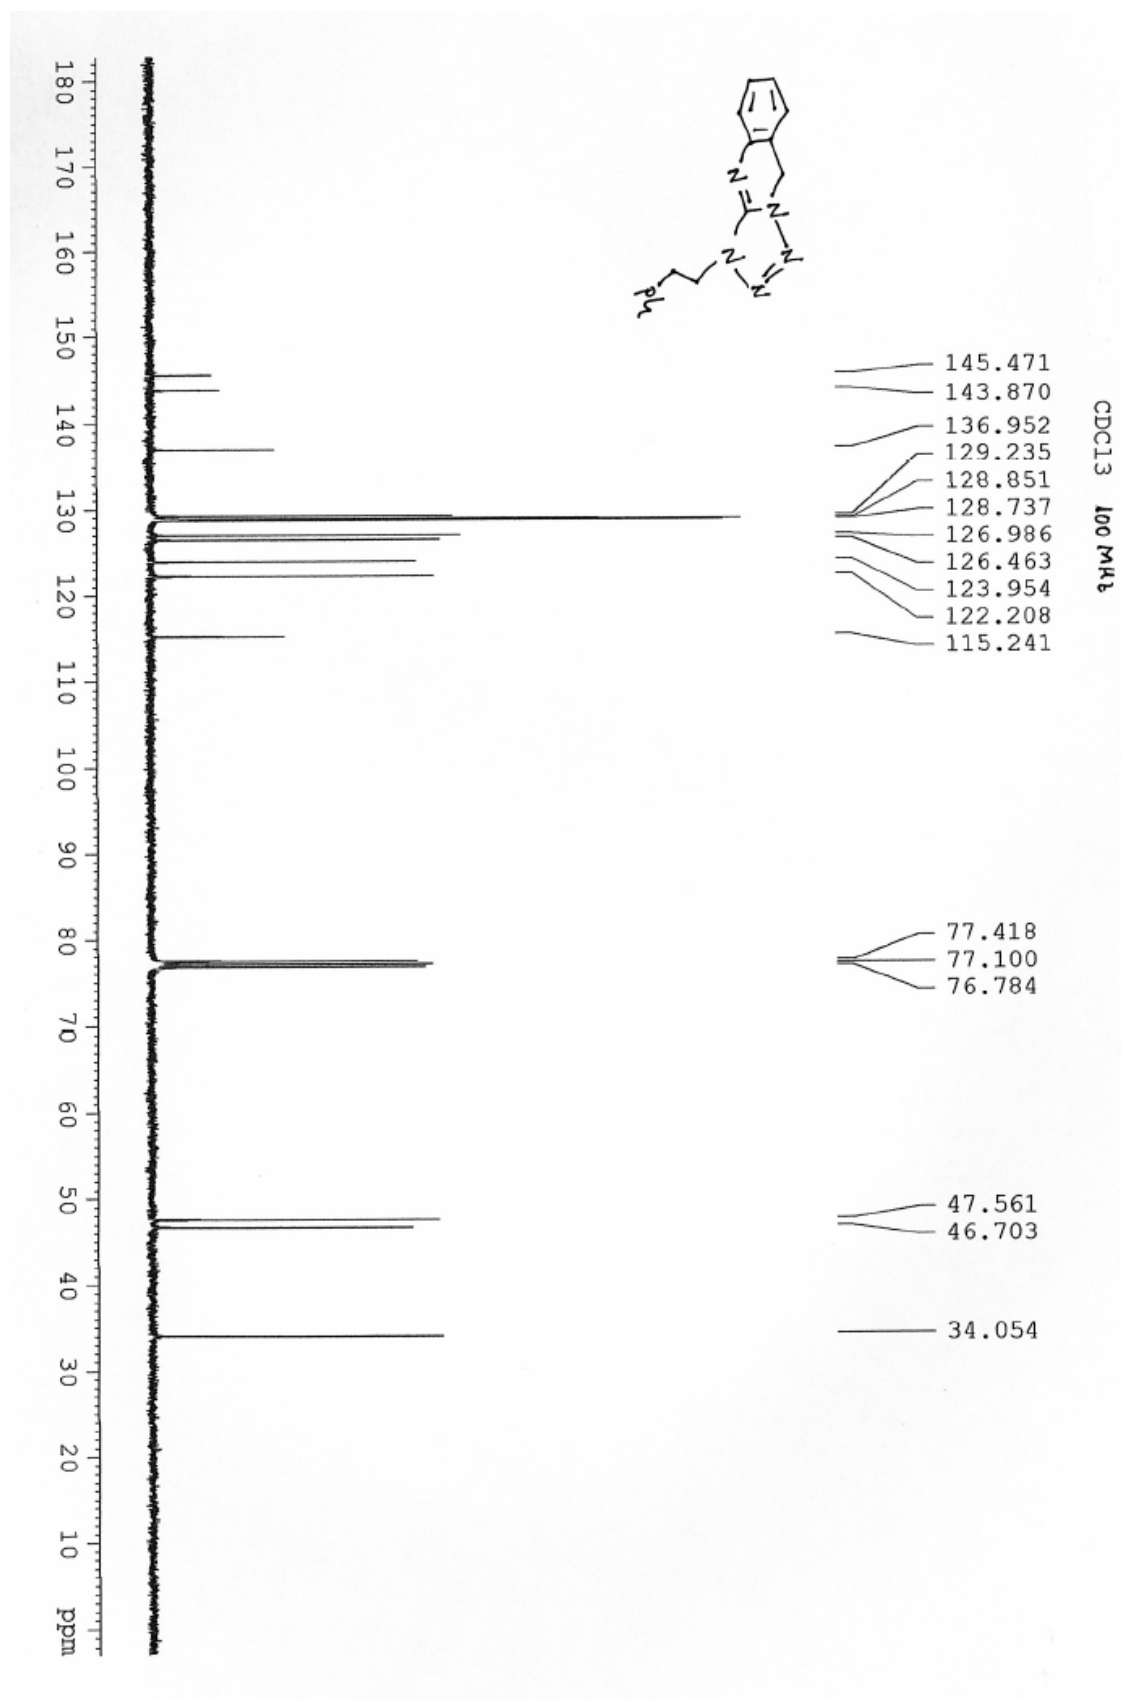

<sup>1</sup>H NMR of 14c

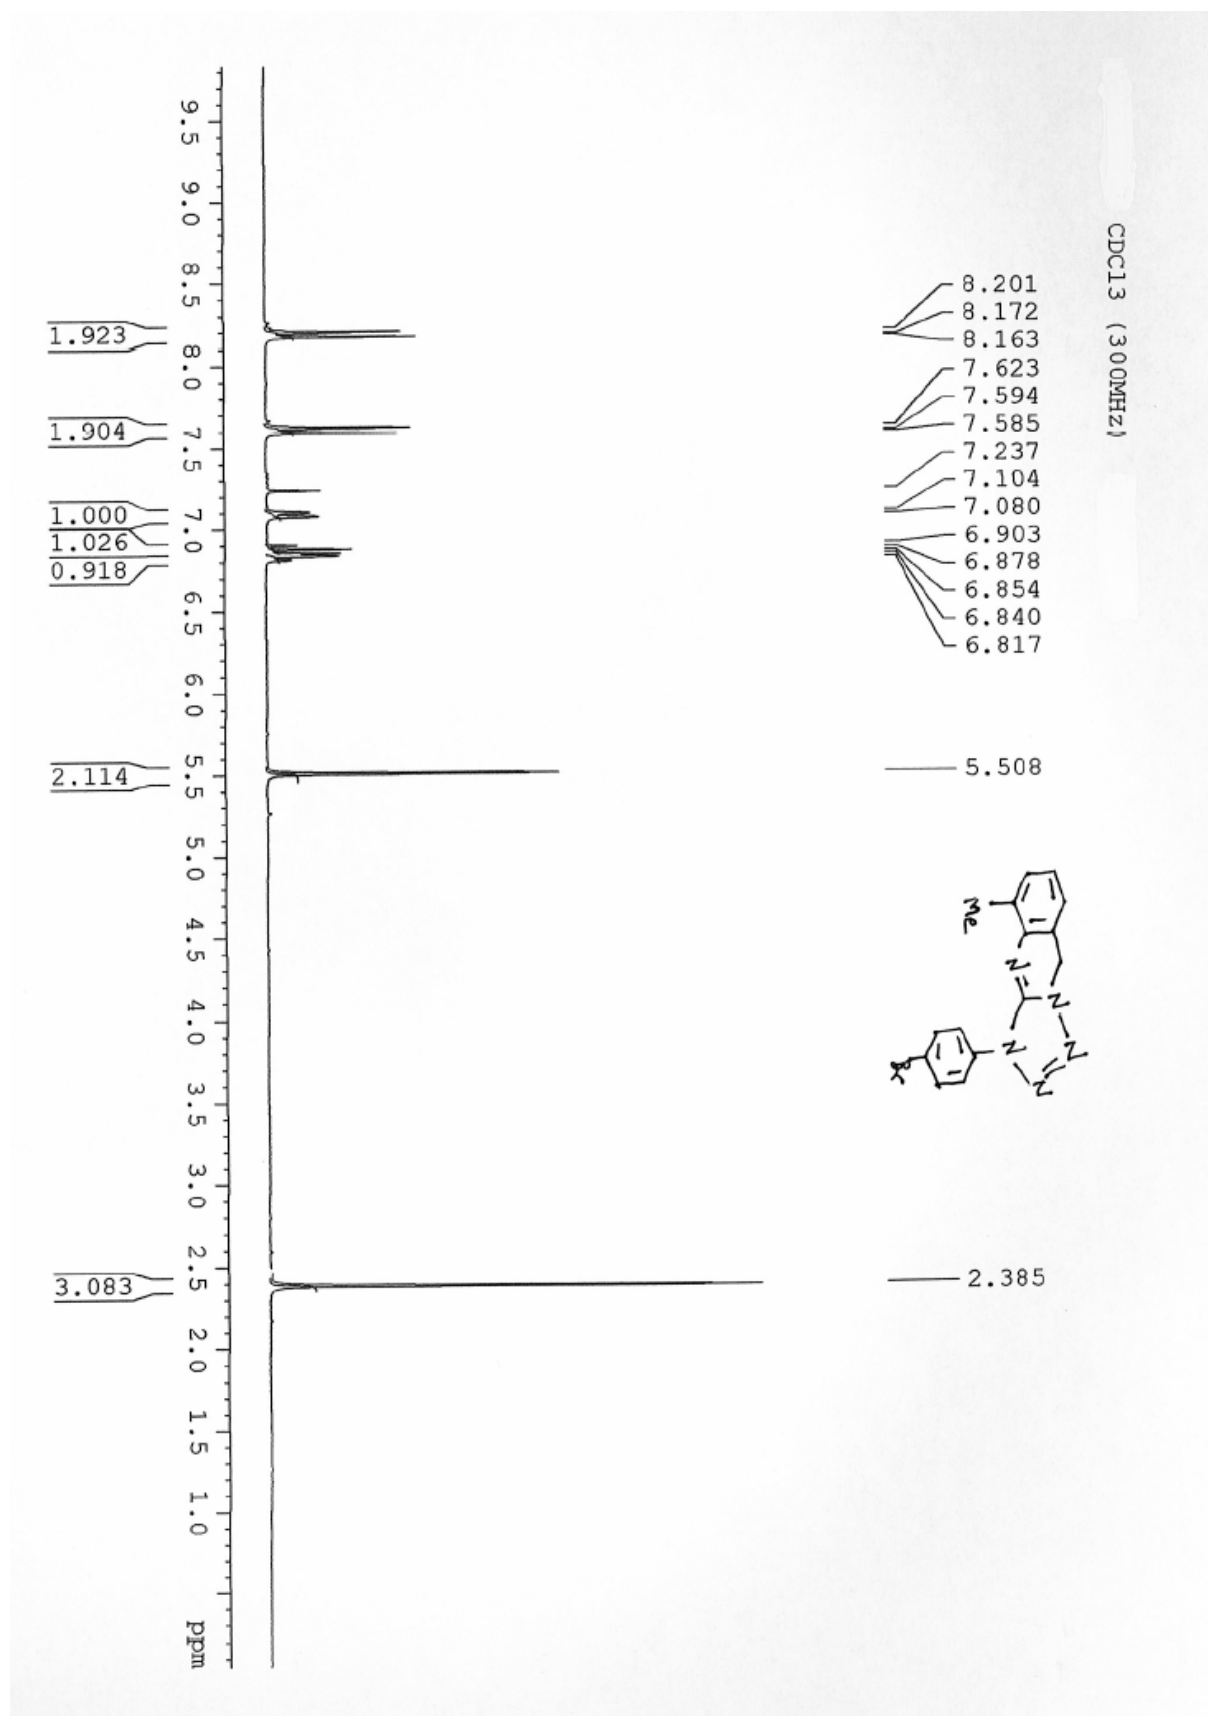

$^{13}\text{C}$  NMR of **14c**

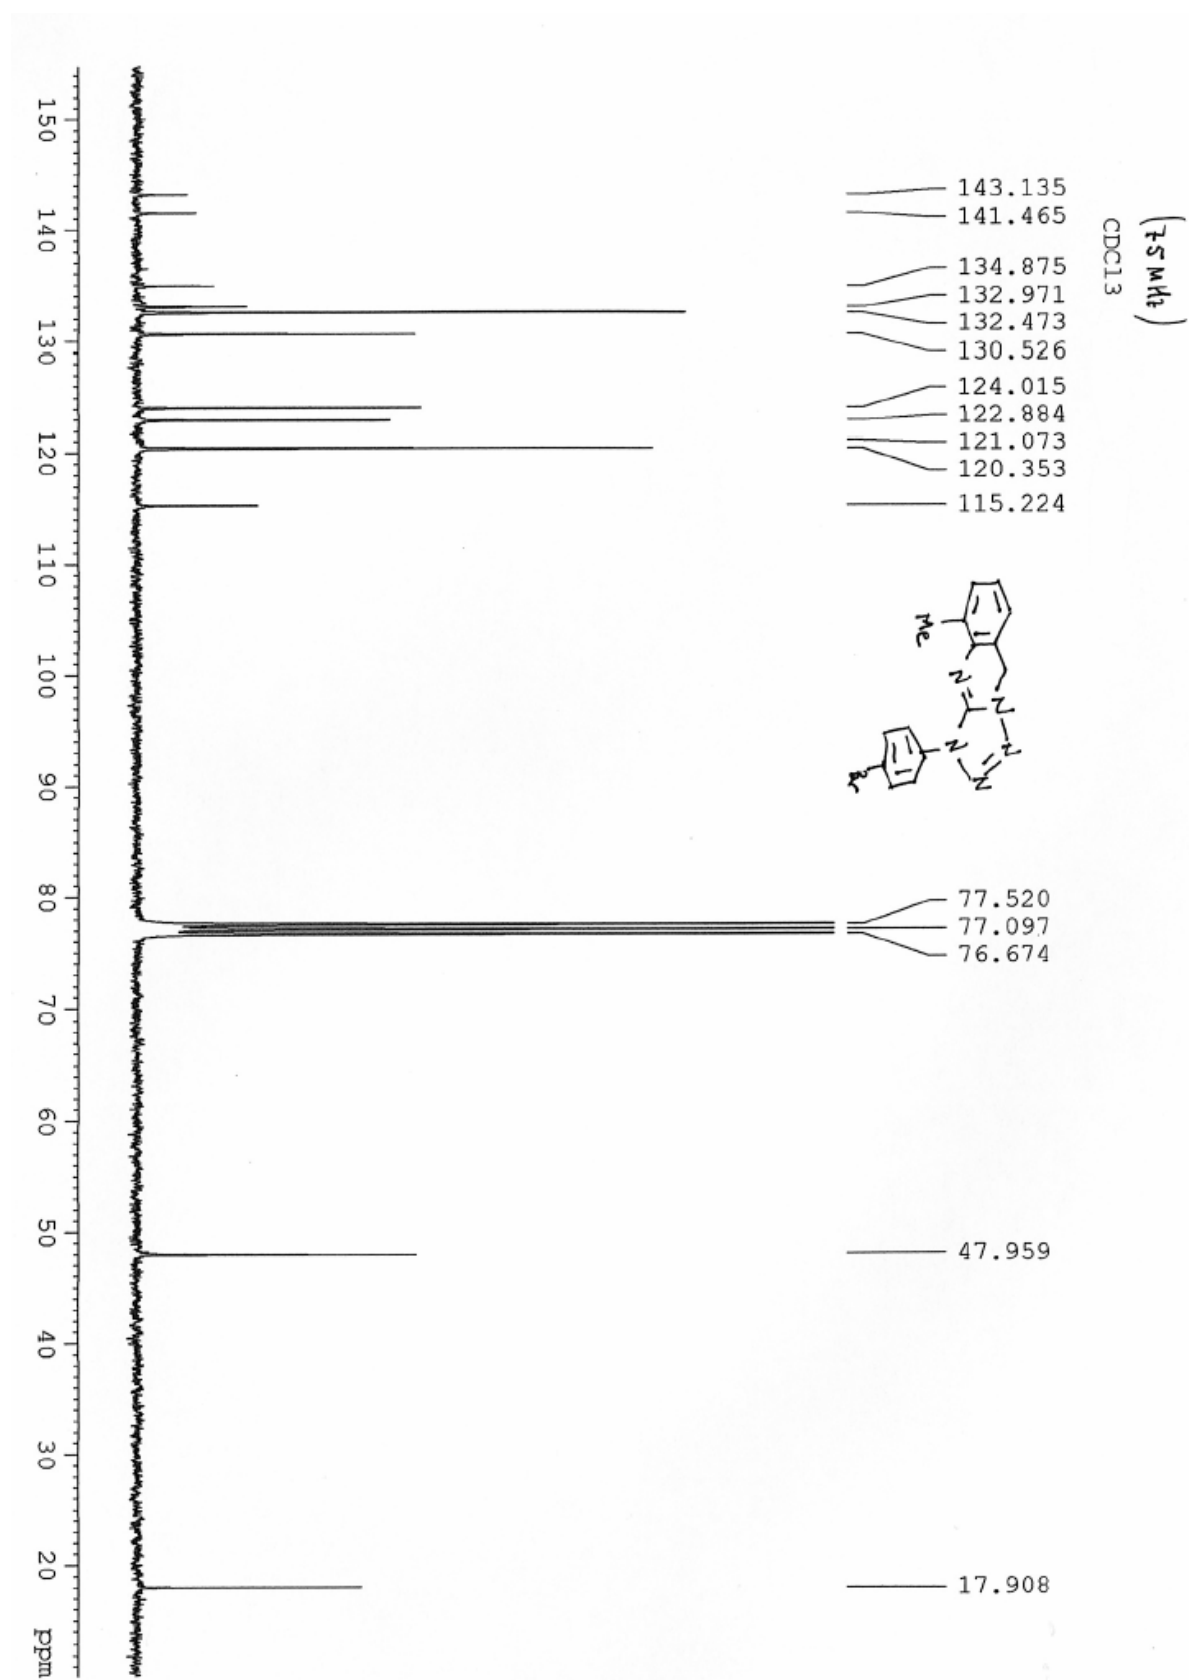

$^1\text{H}$  NMR of **14d**

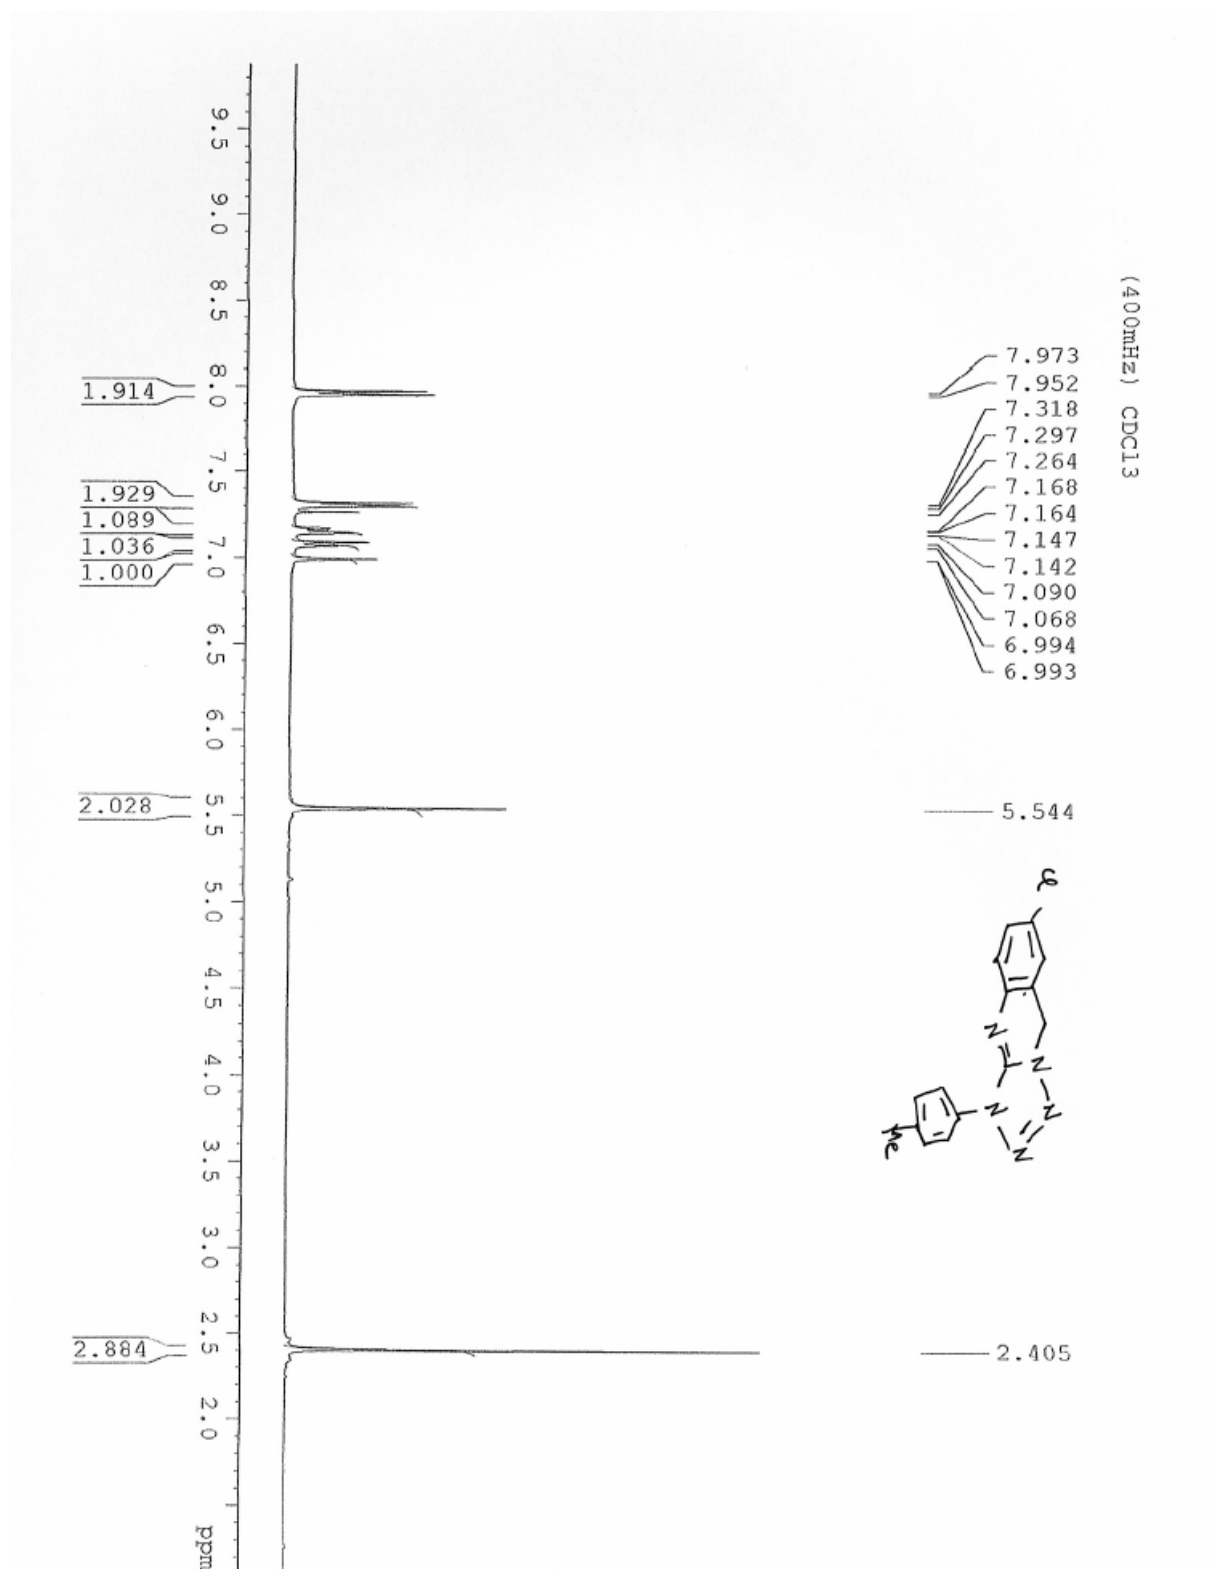

$^{13}\text{C}$  NMR of **14d**

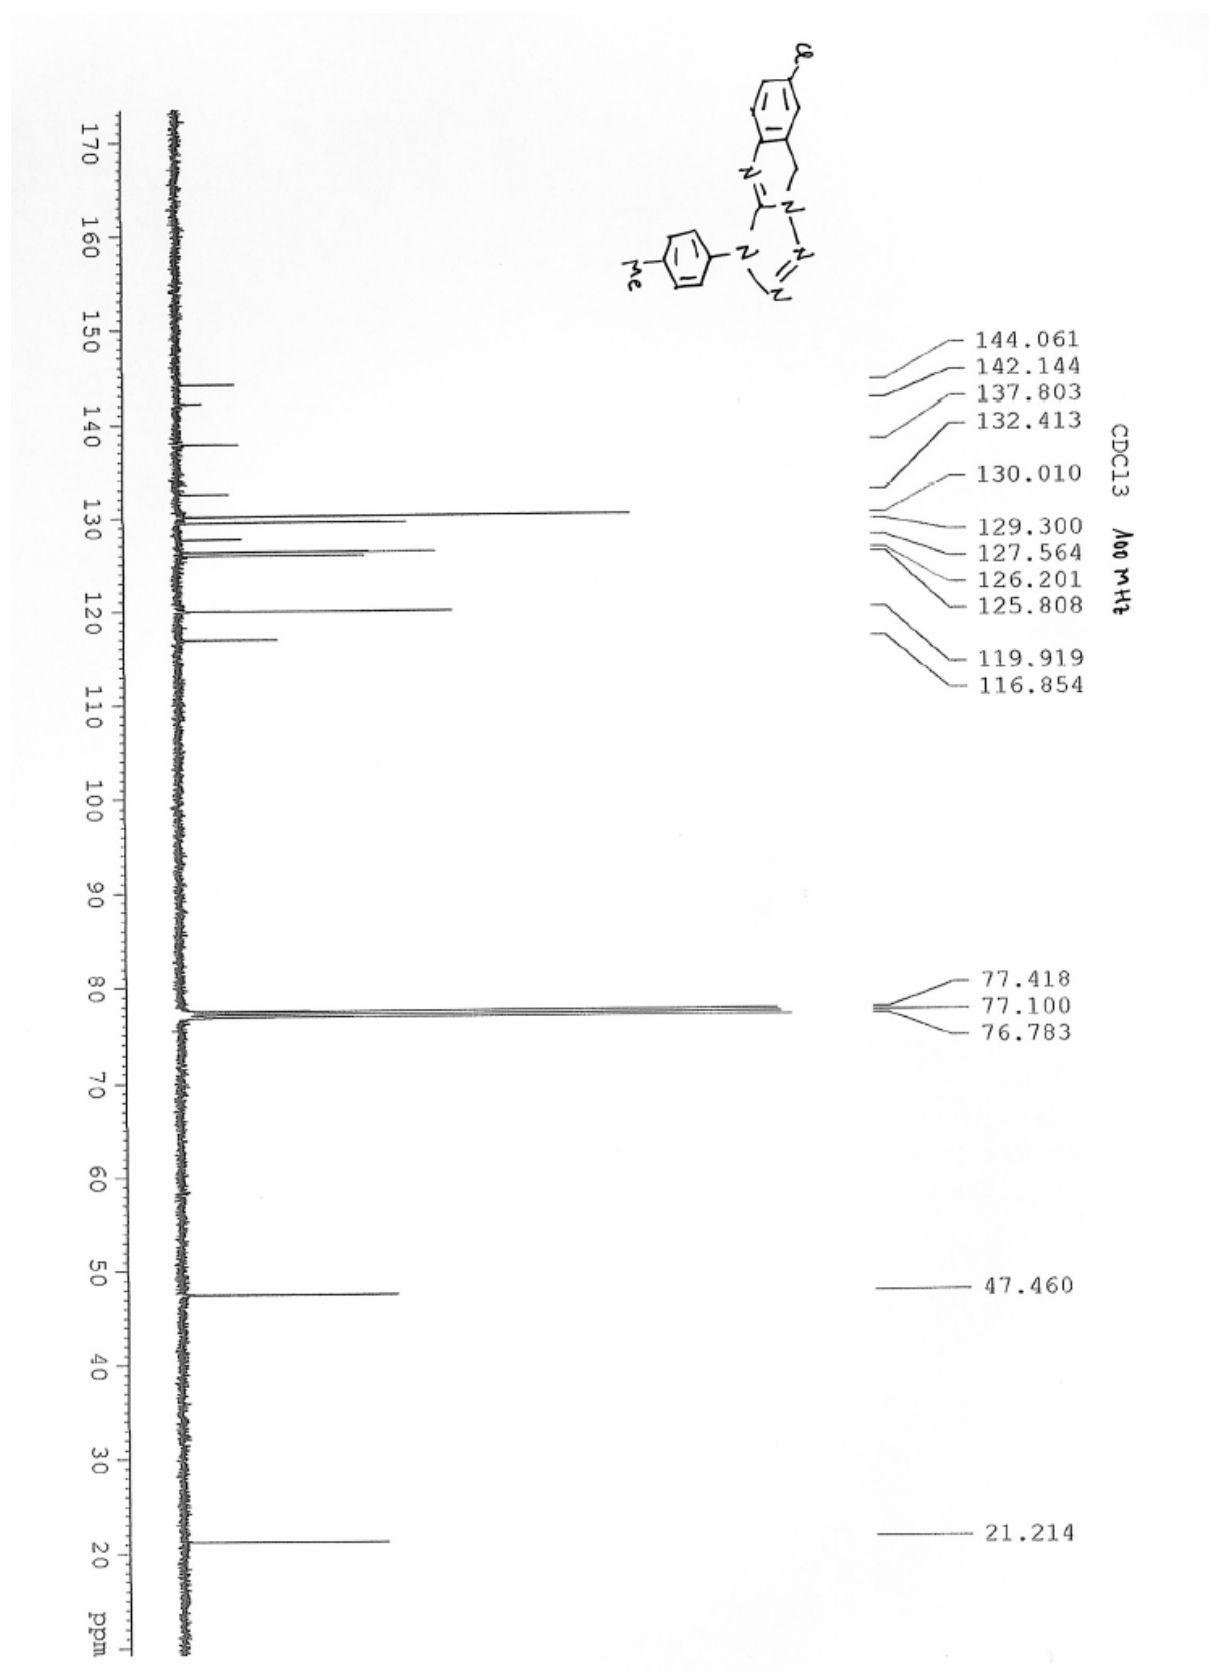

<sup>1</sup>H NMR of **14e**

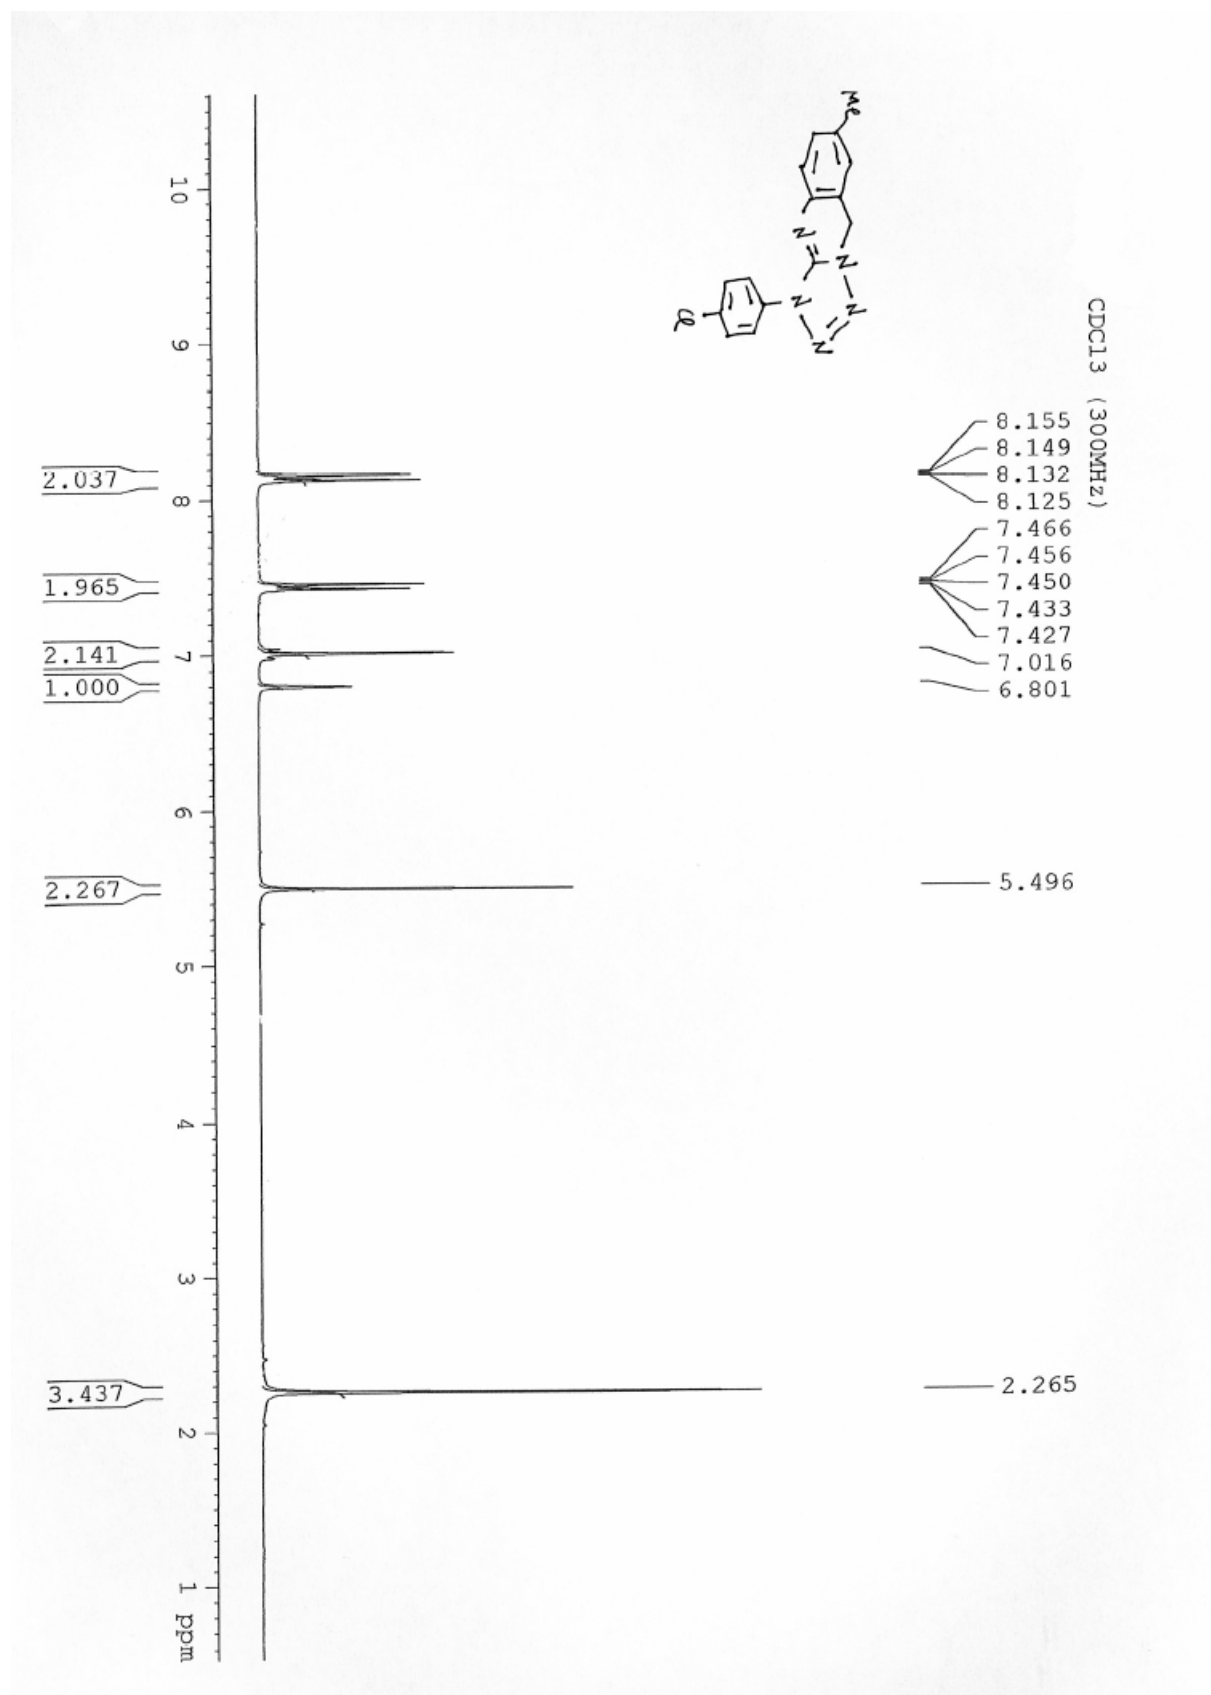



<sup>13</sup>C NMR of 14e

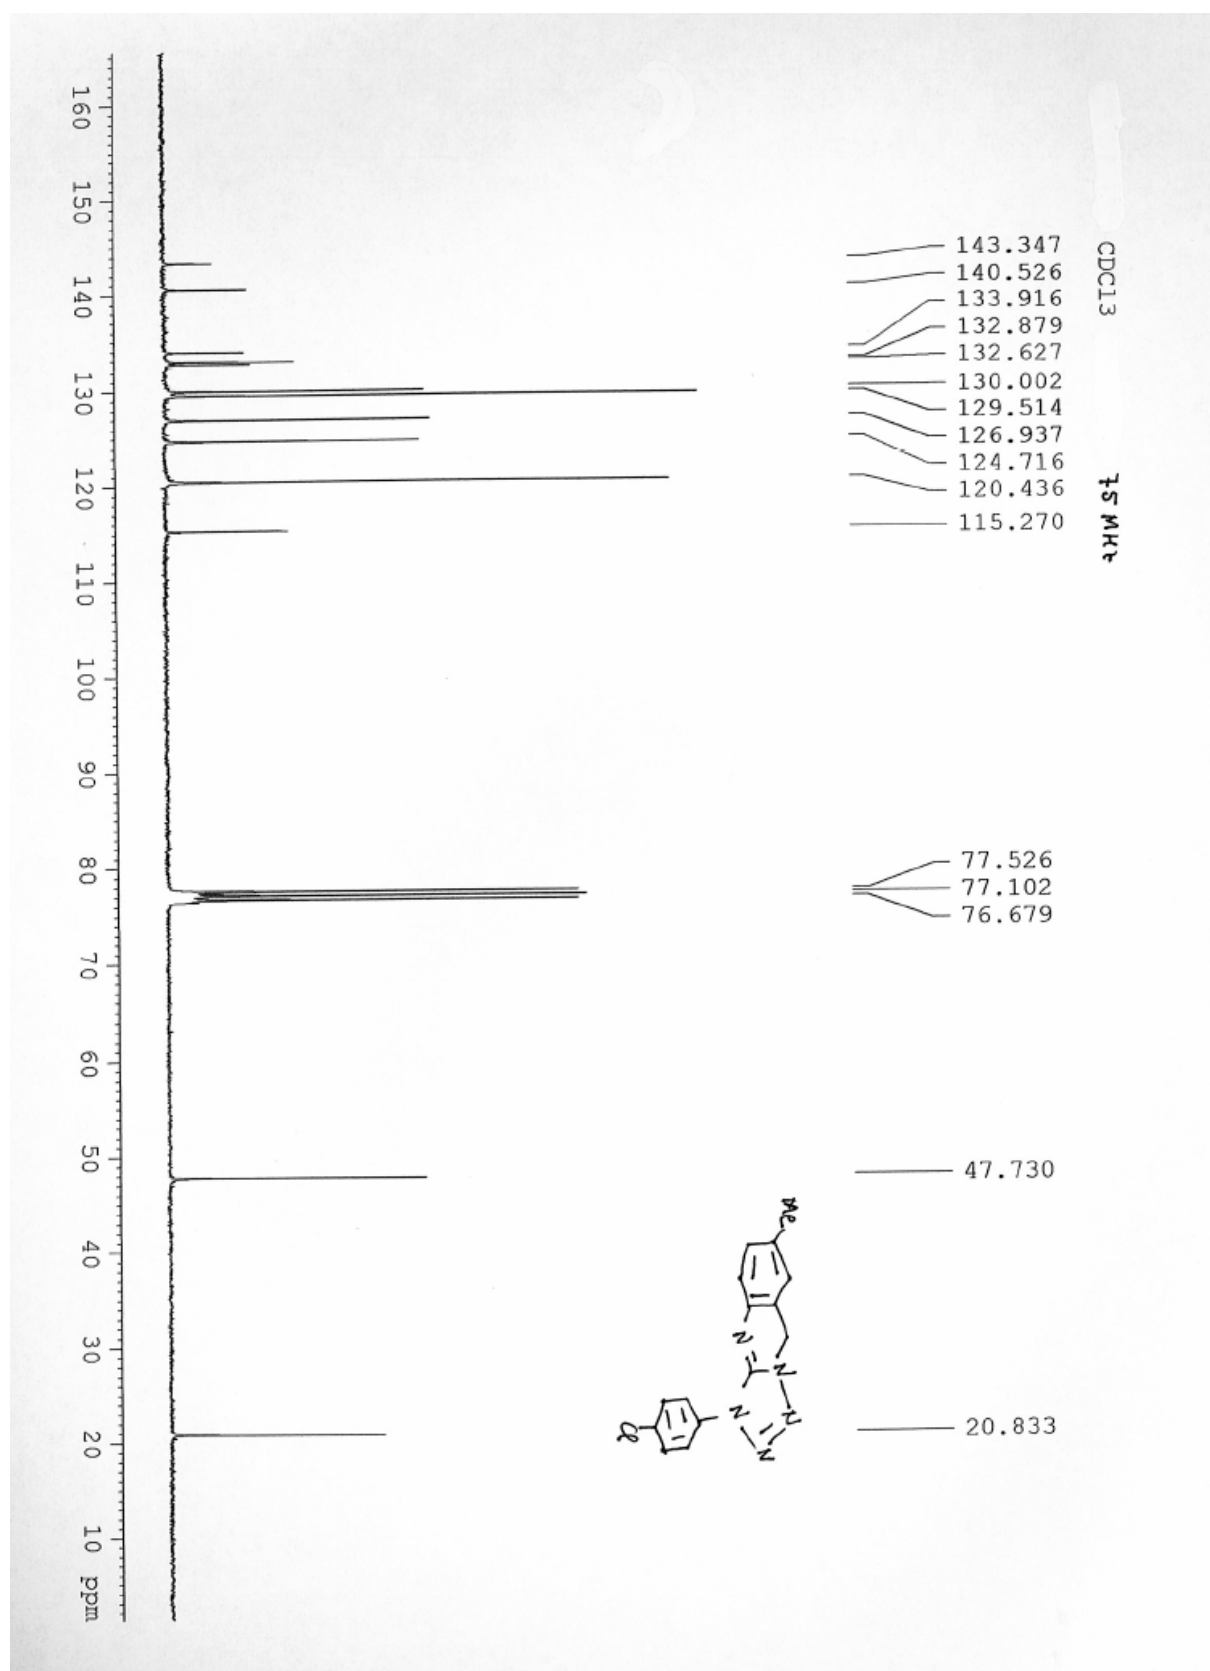

<sup>1</sup>H NMR of **14f**

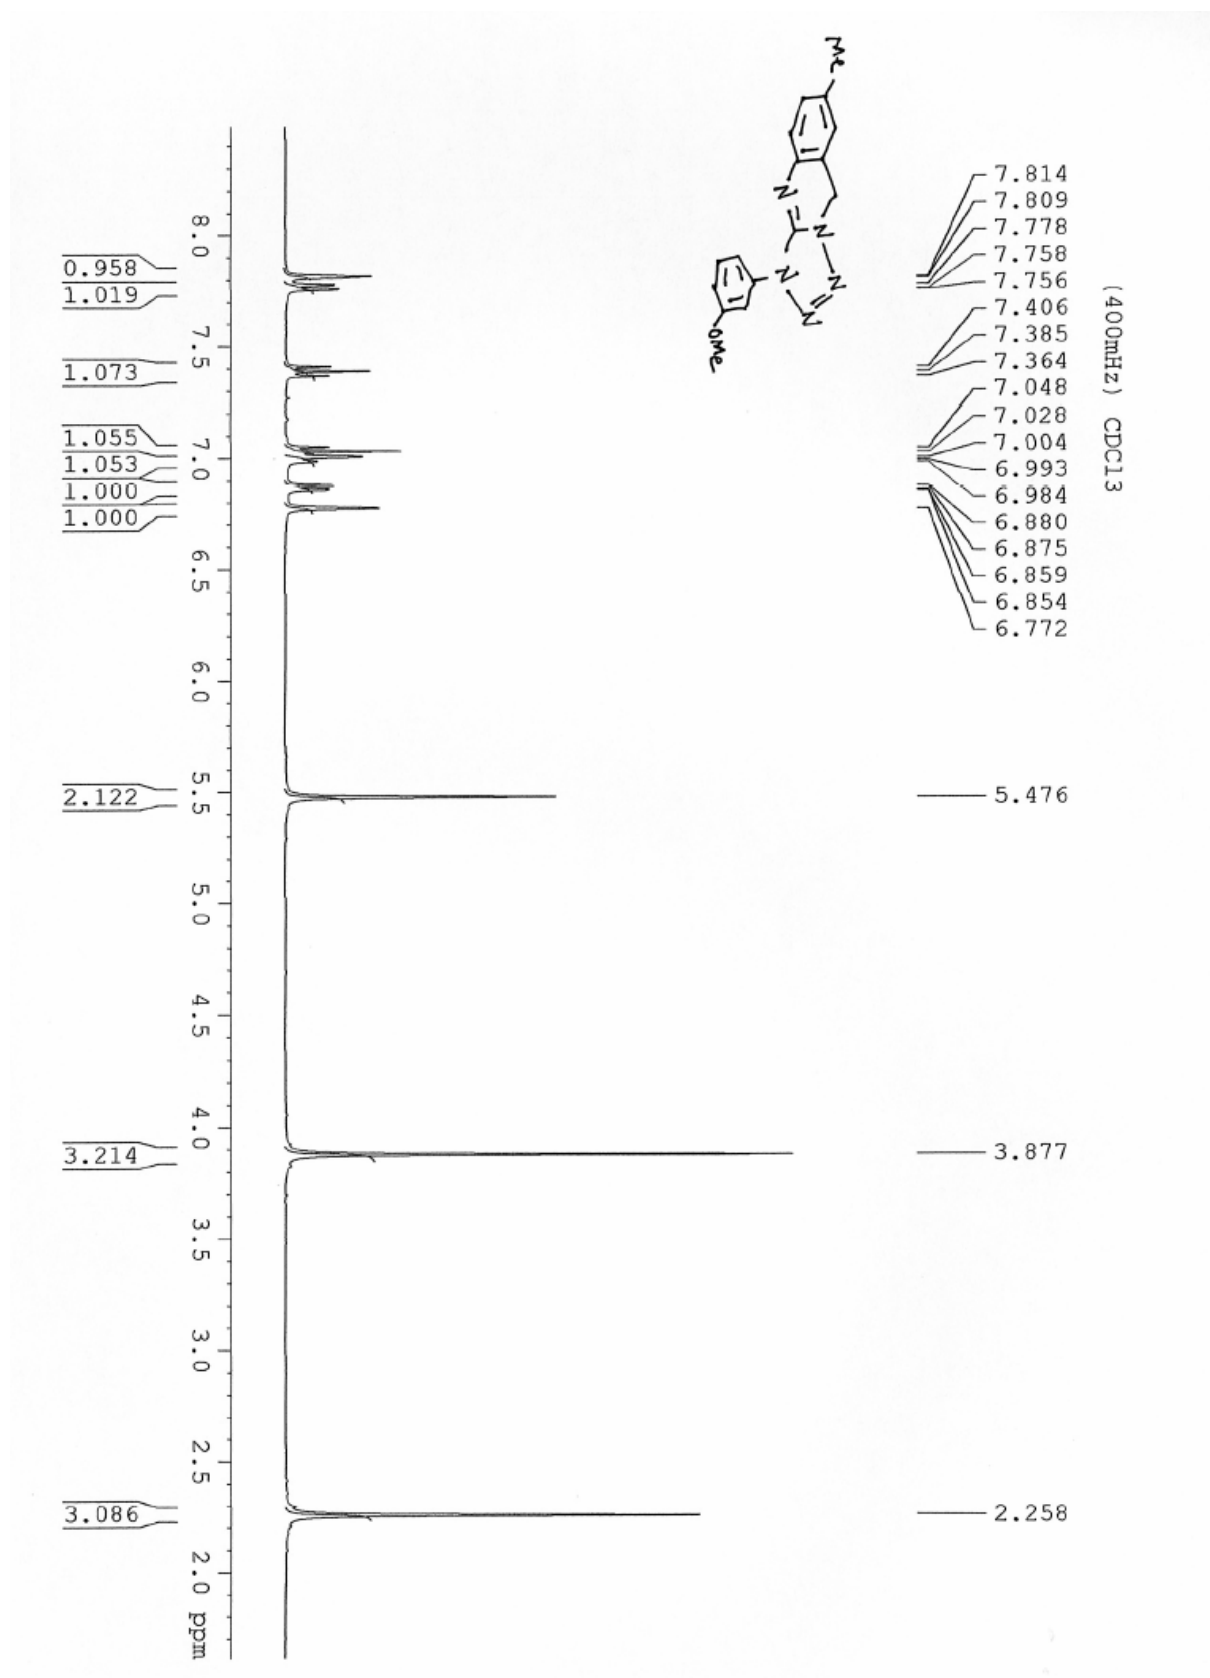

$^{13}\text{C}$  NMR of **14f**

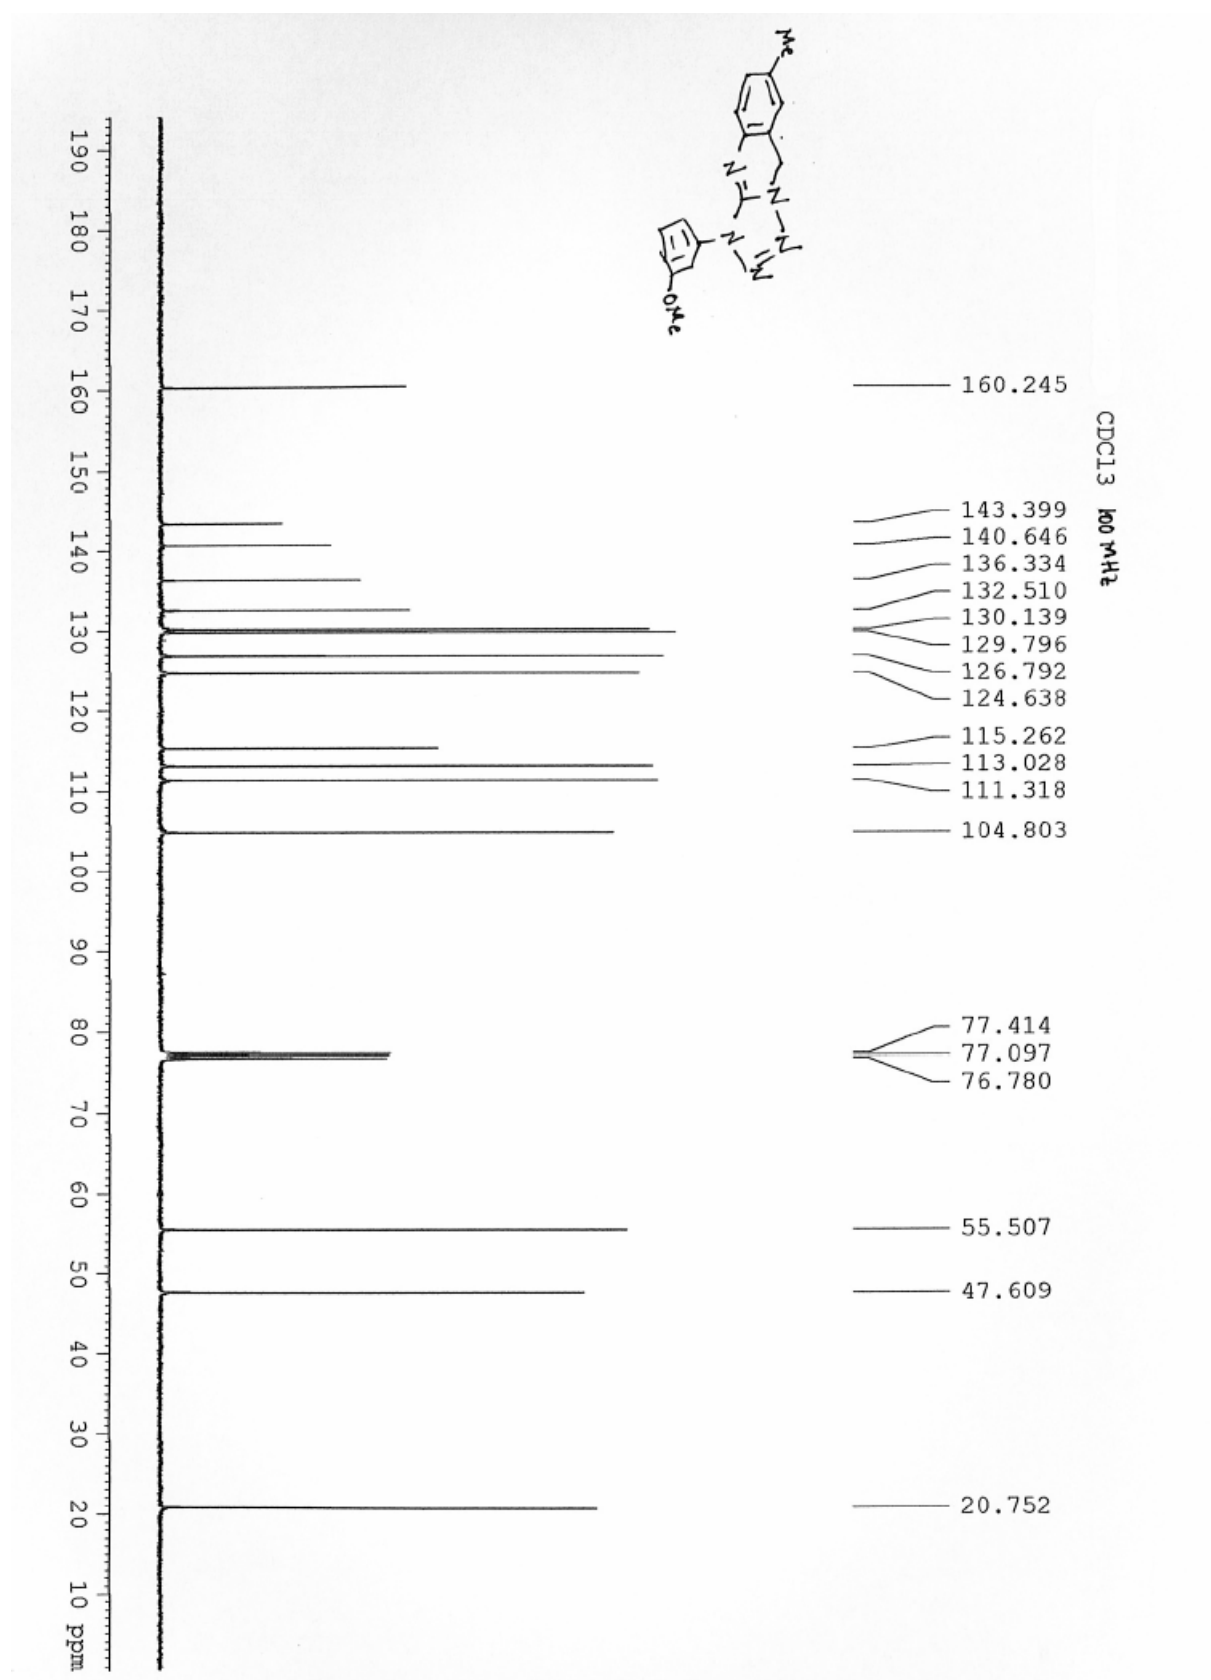

$^1\text{H}$  NMR of **14g**

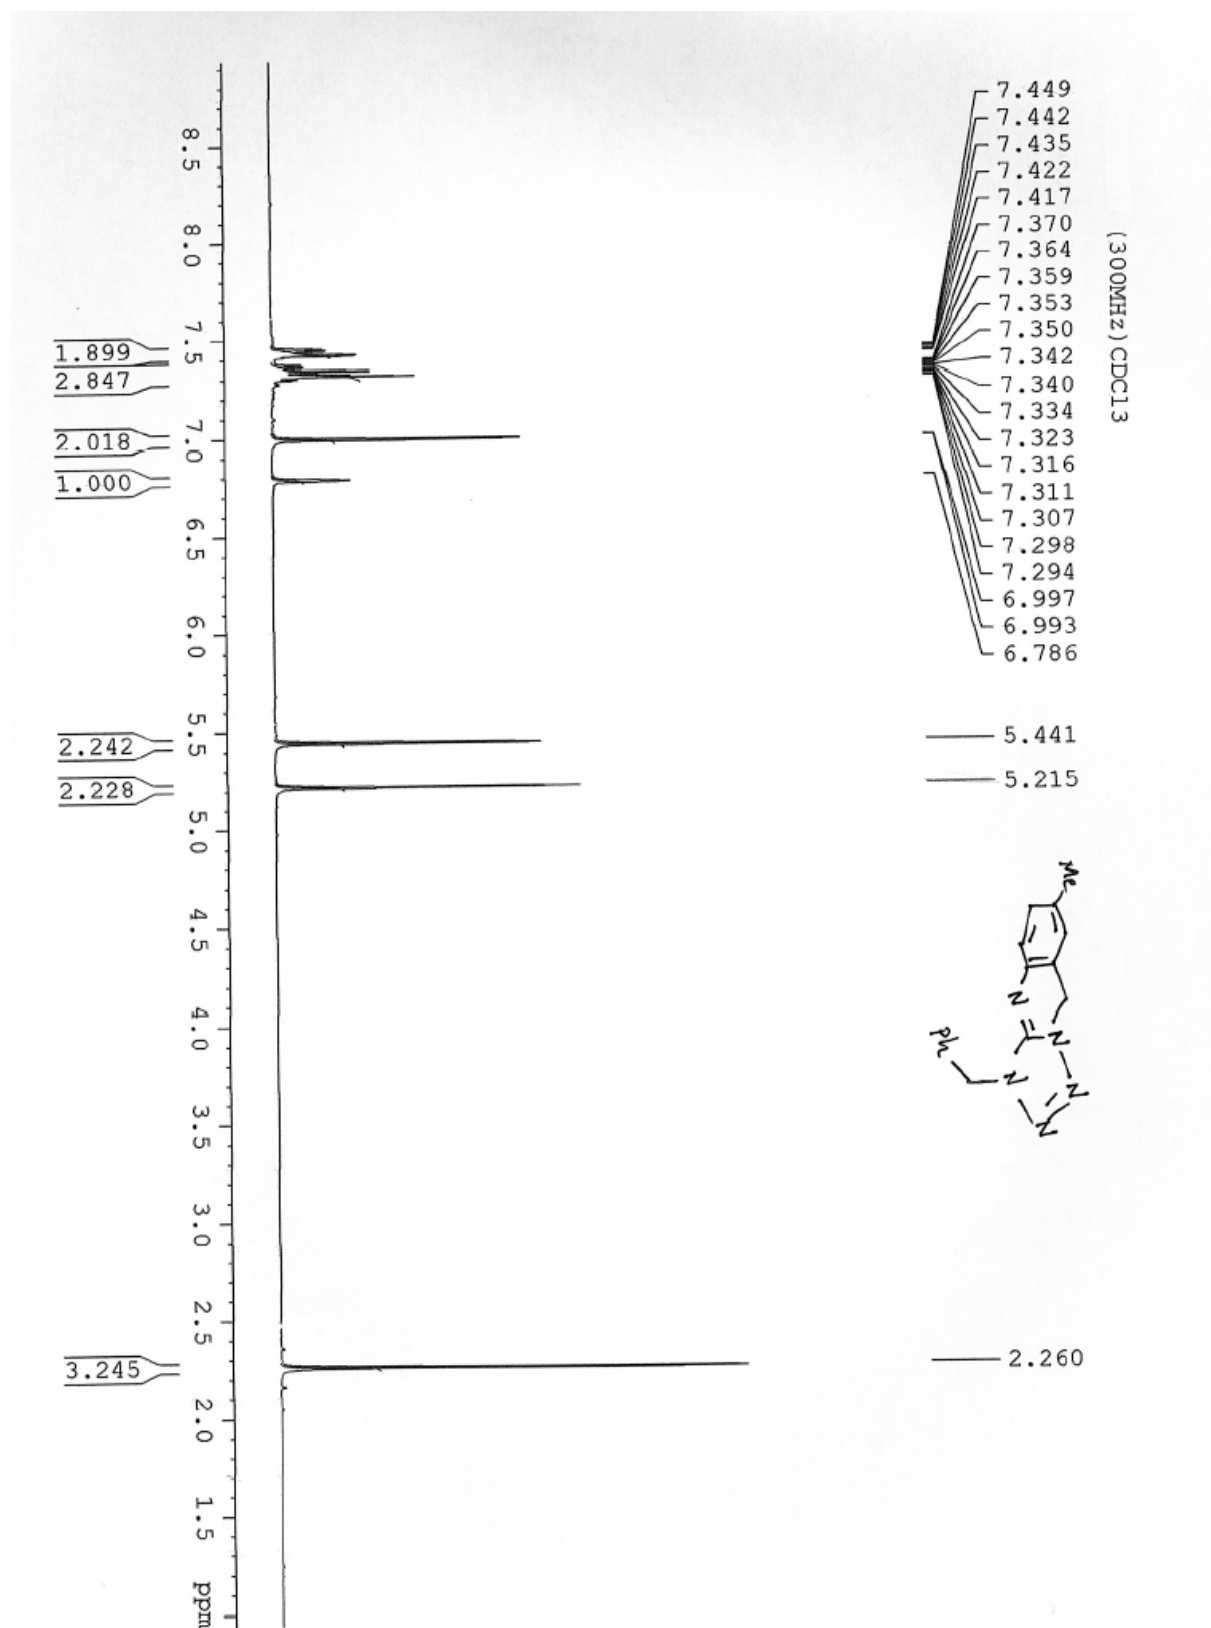

$^{13}\text{C}$  NMR of 14g

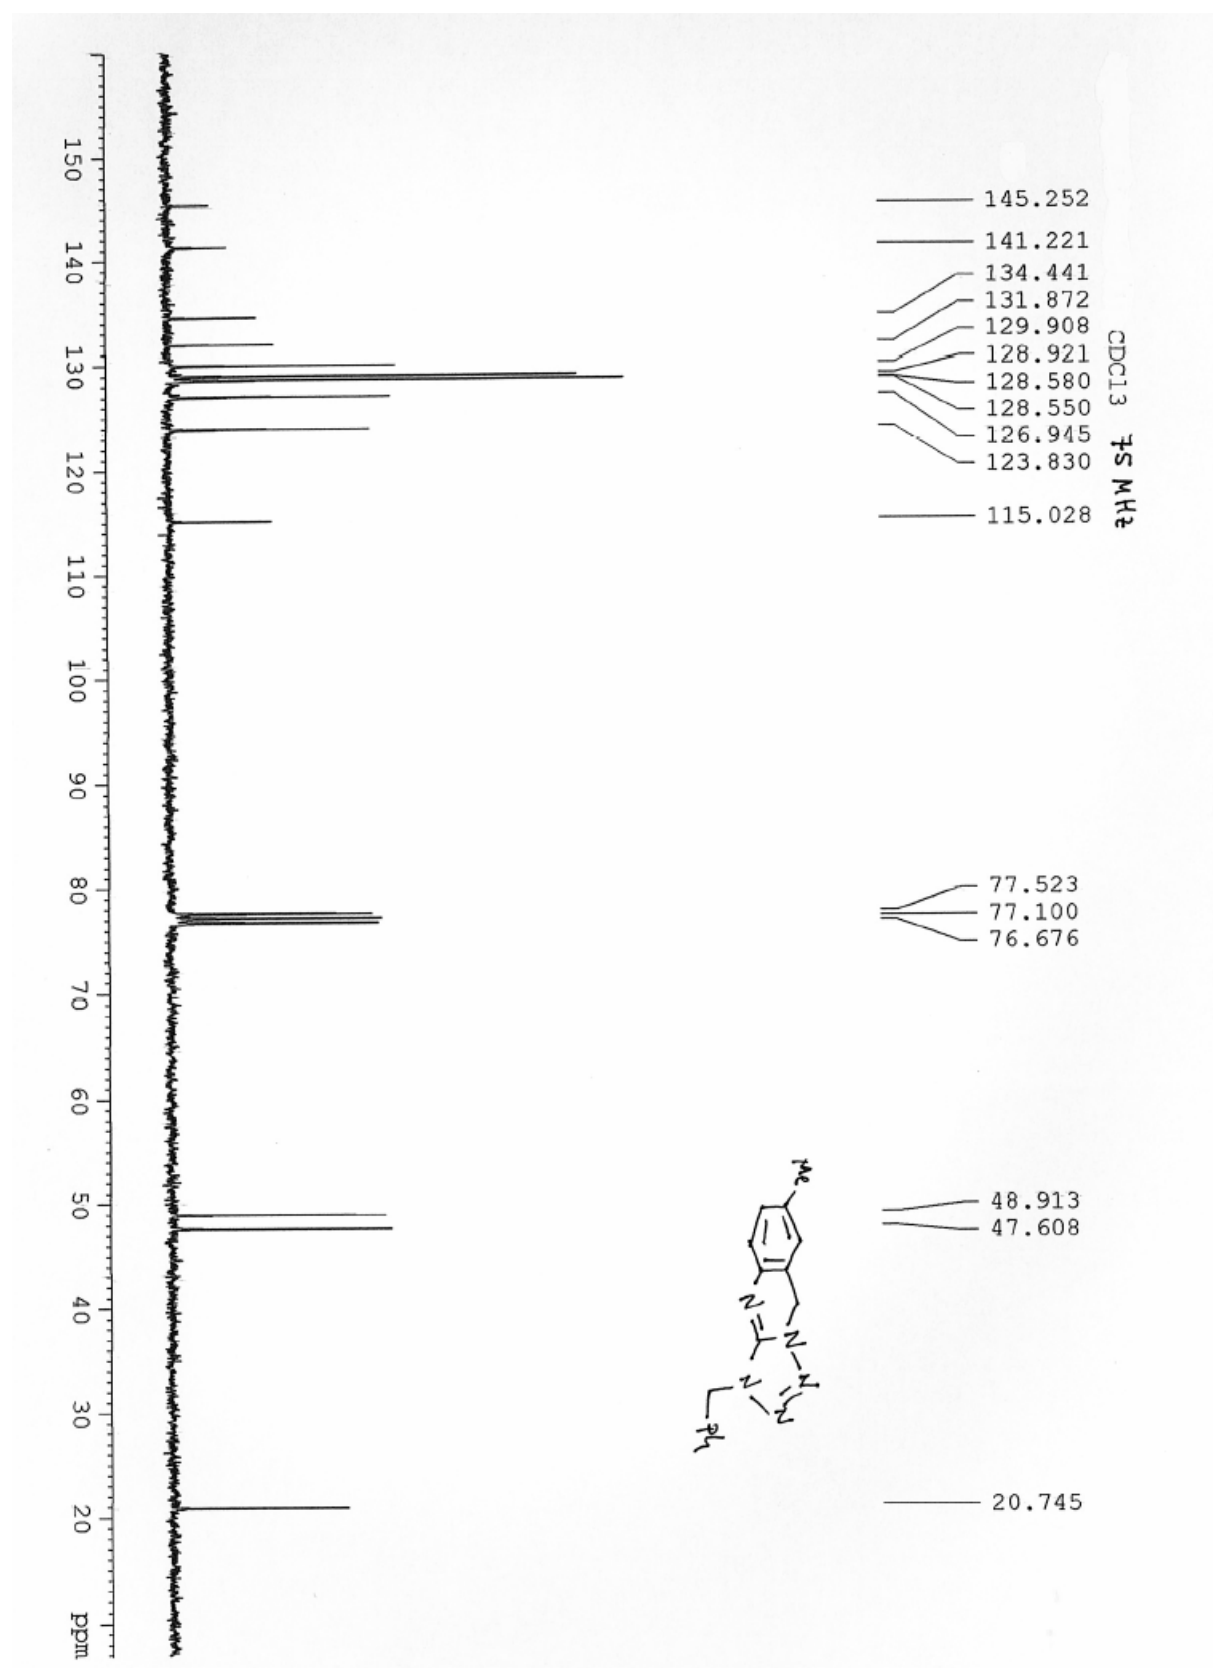

<sup>1</sup>H NMR of **14h**

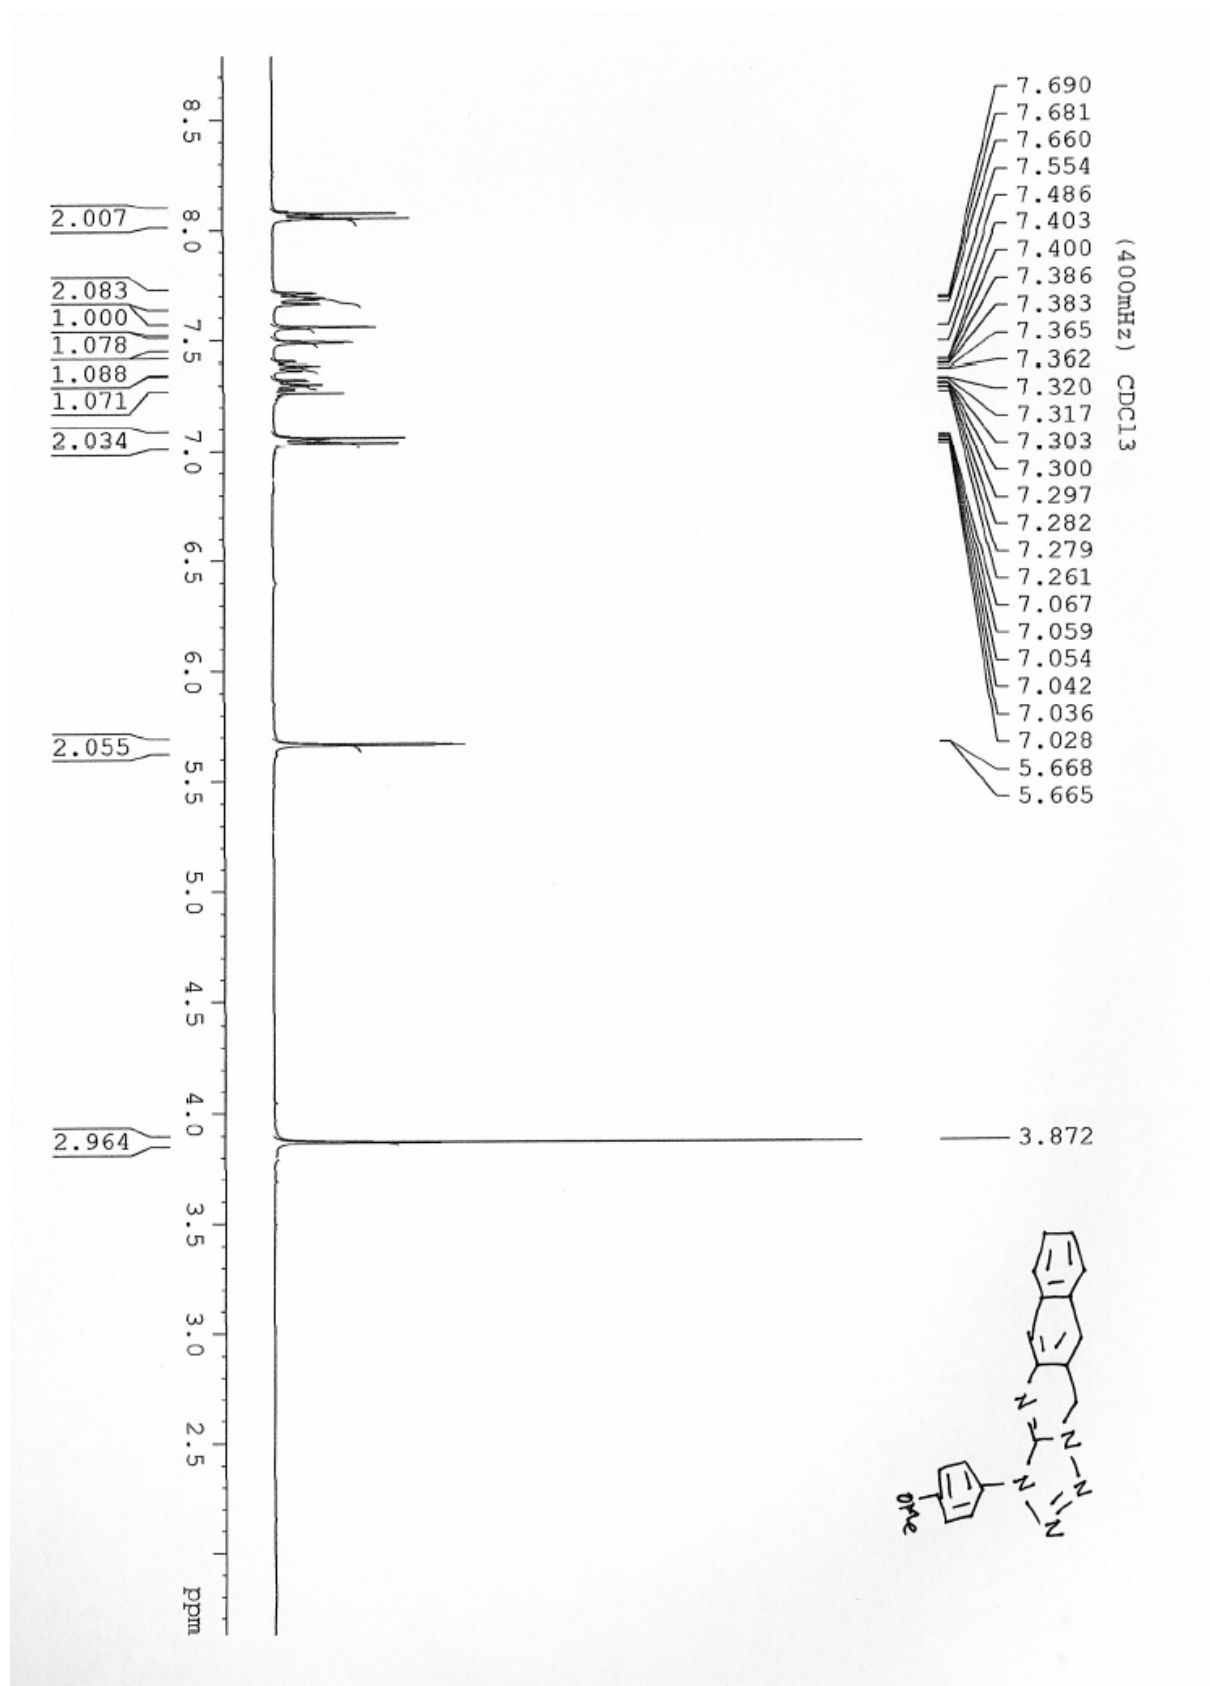

$^{13}\text{C}$  NMR of **14h**

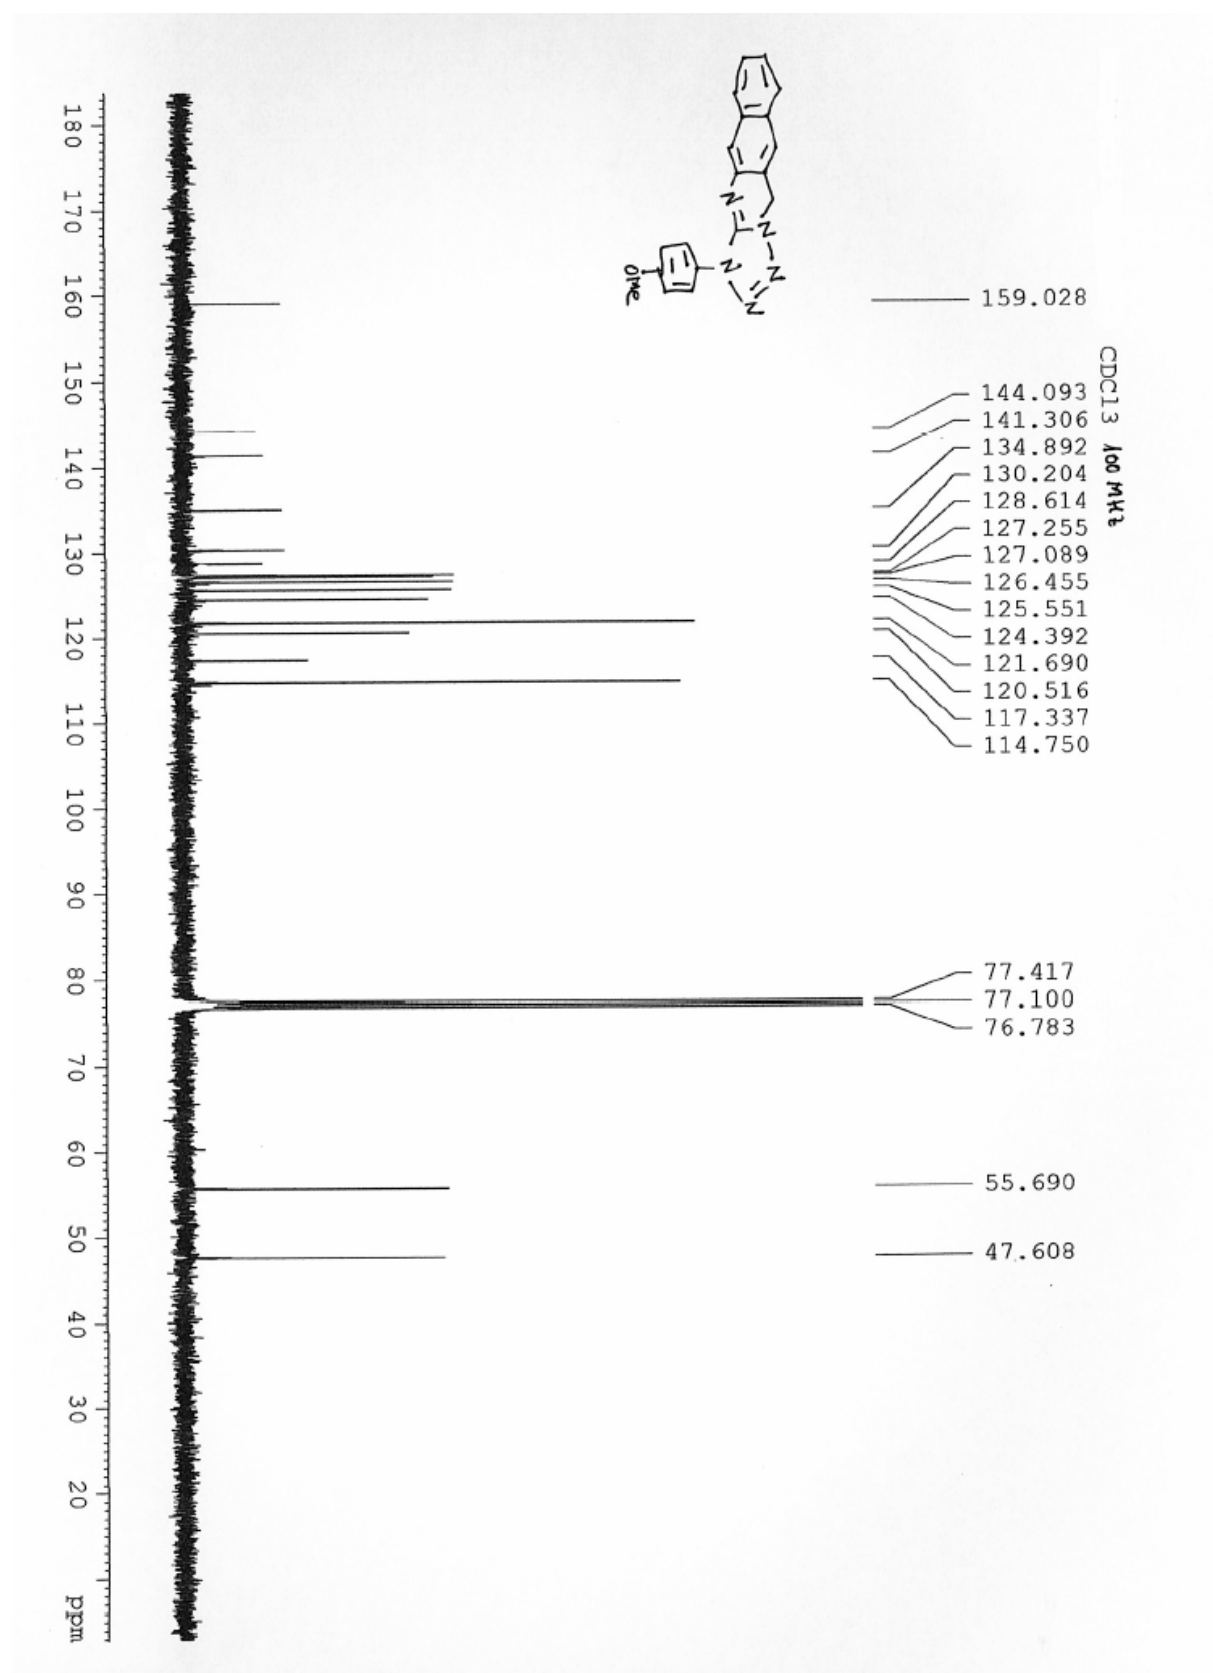

<sup>1</sup>H NMR of **15a**

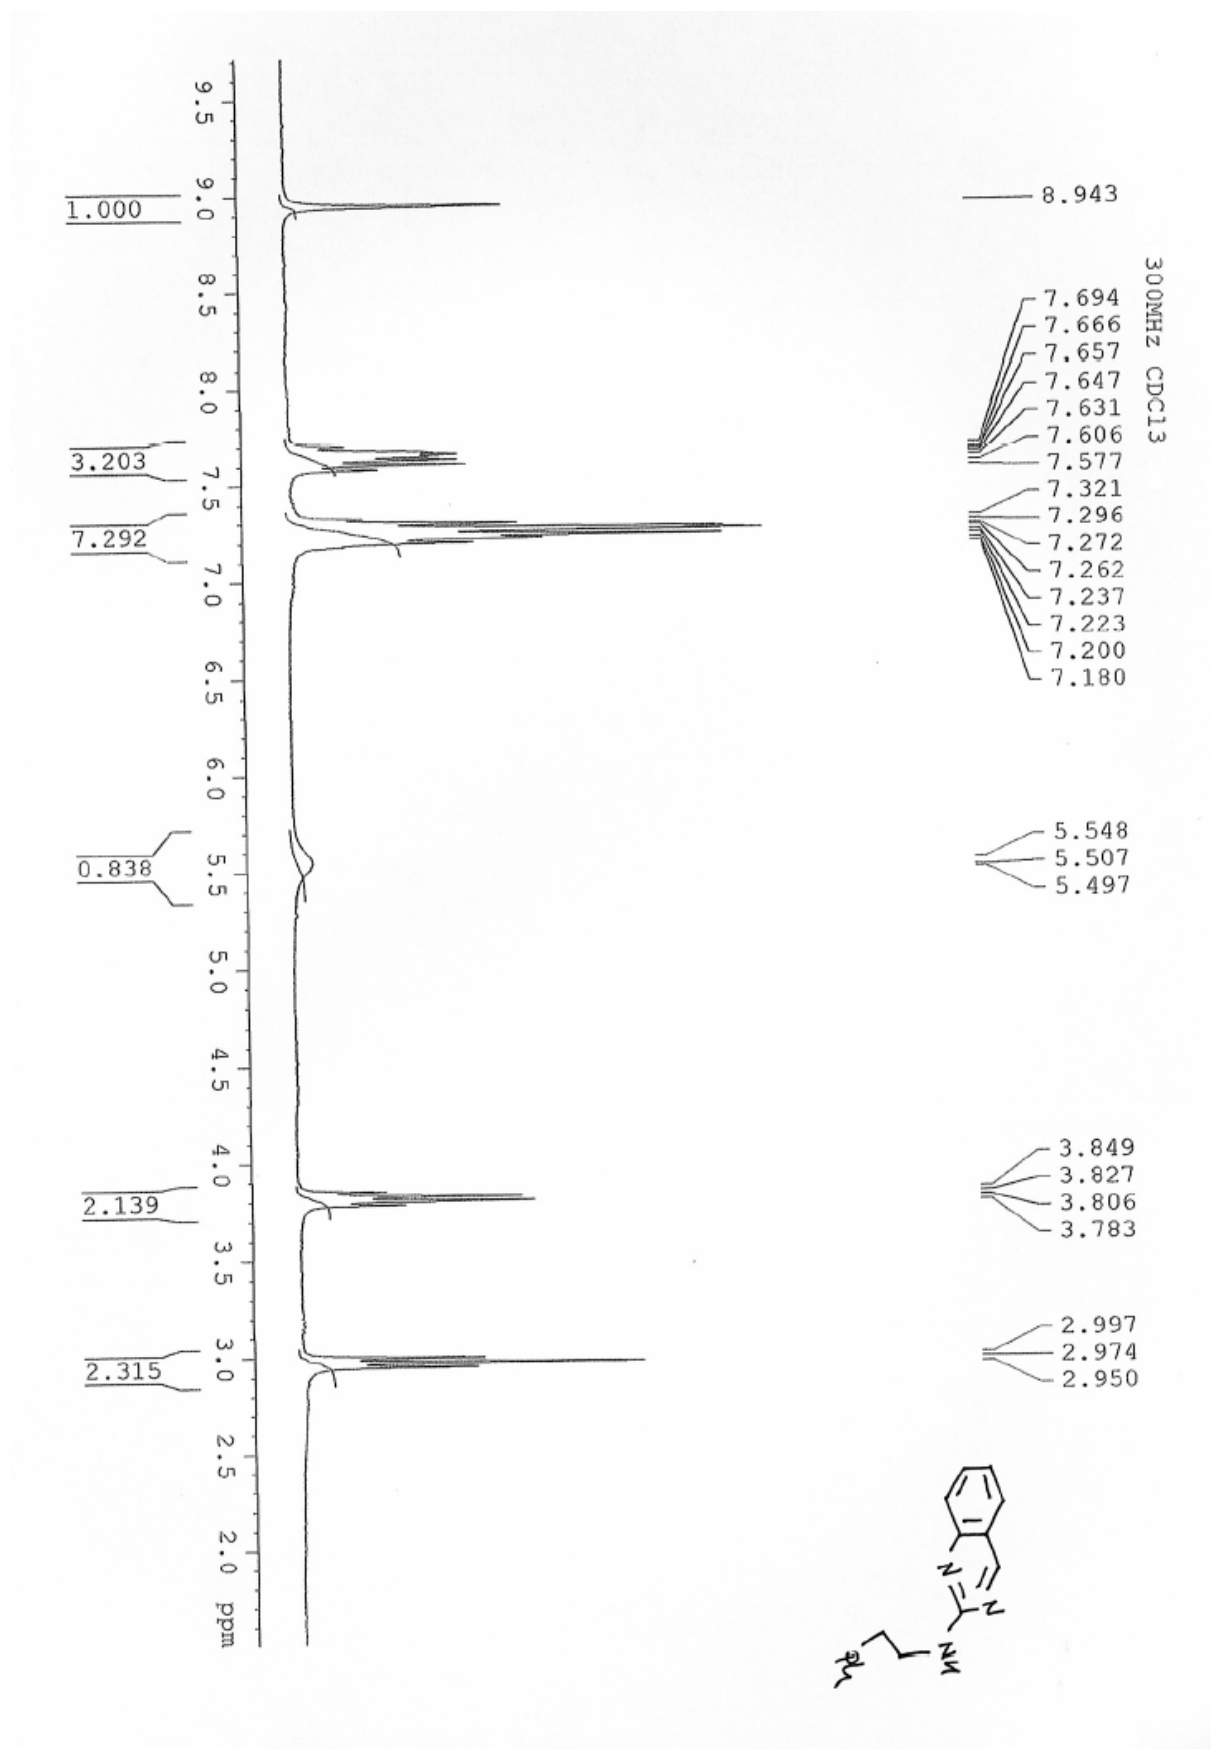



$^{13}\text{C}$  NMR of **15a**

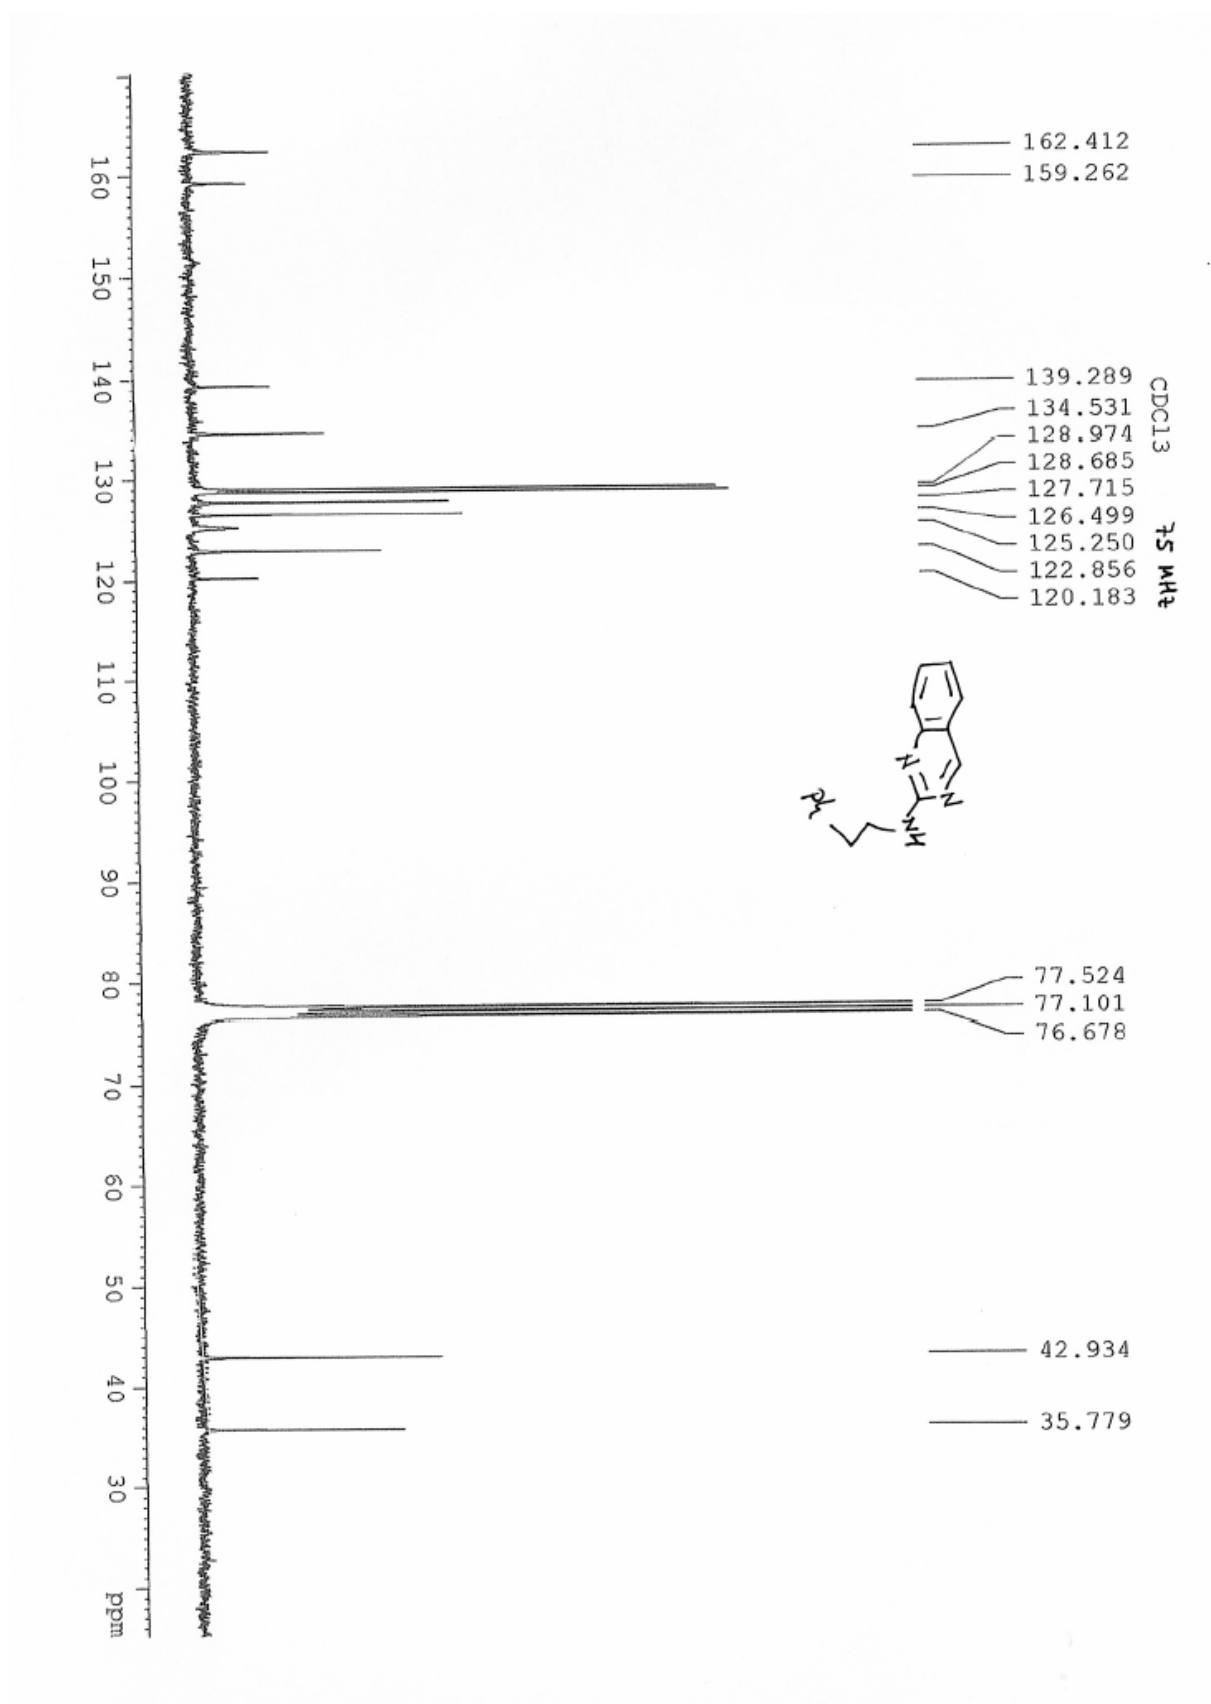

$^1\text{H}$  NMR of **15b**

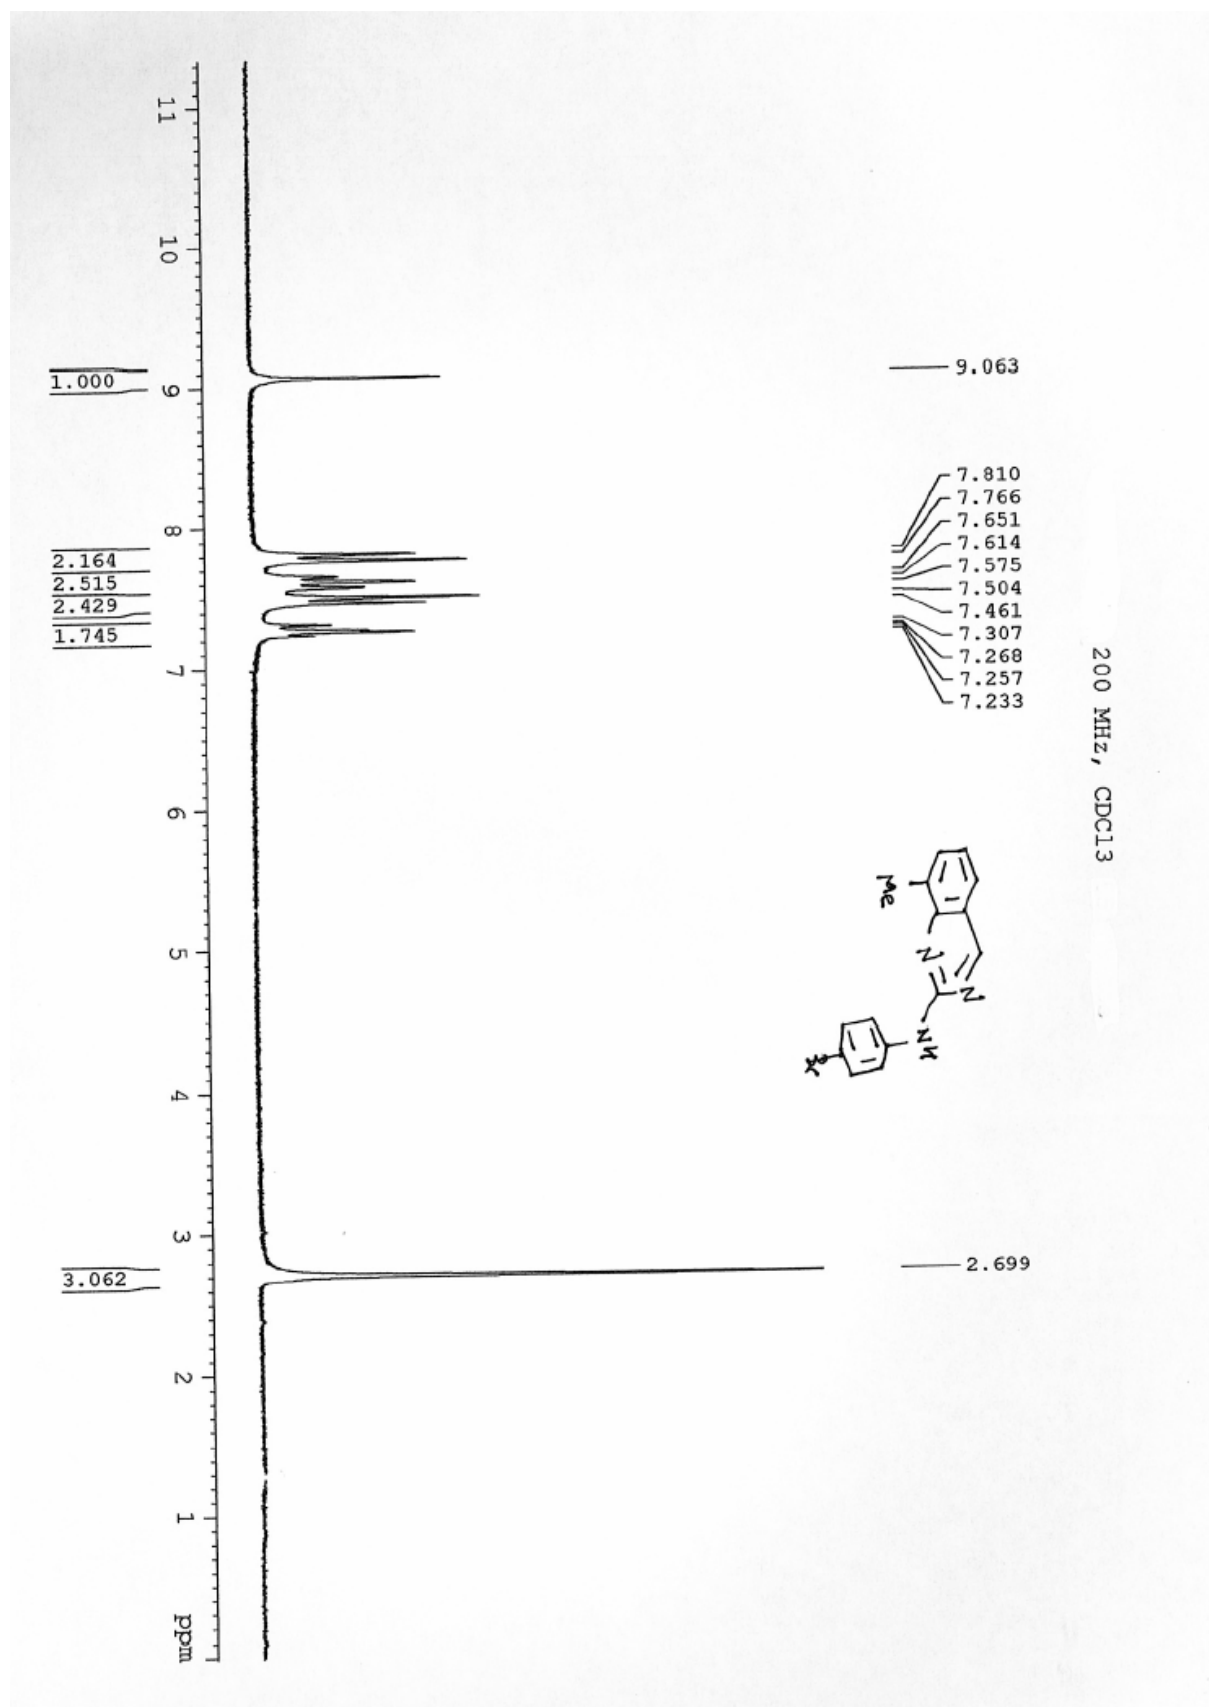

$^{13}\text{C}$  NMR of **15b**

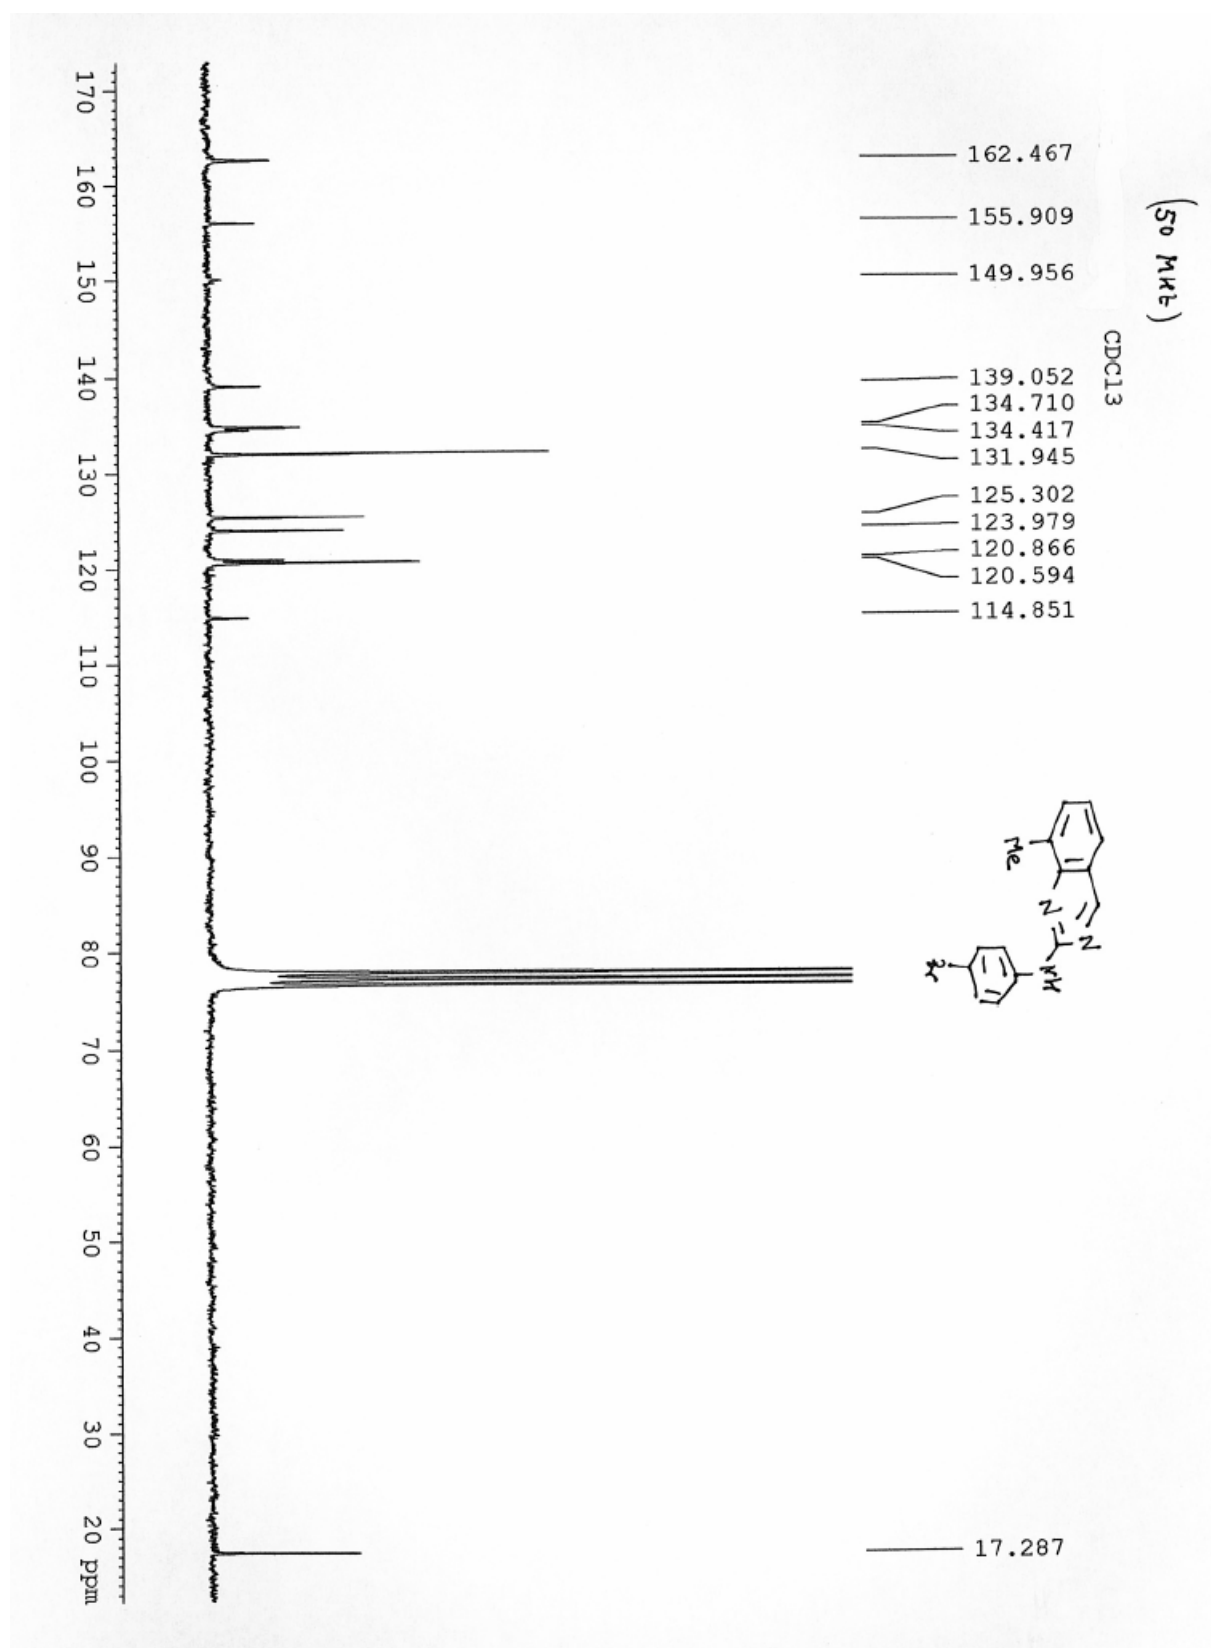

<sup>1</sup>H NMR of 15c

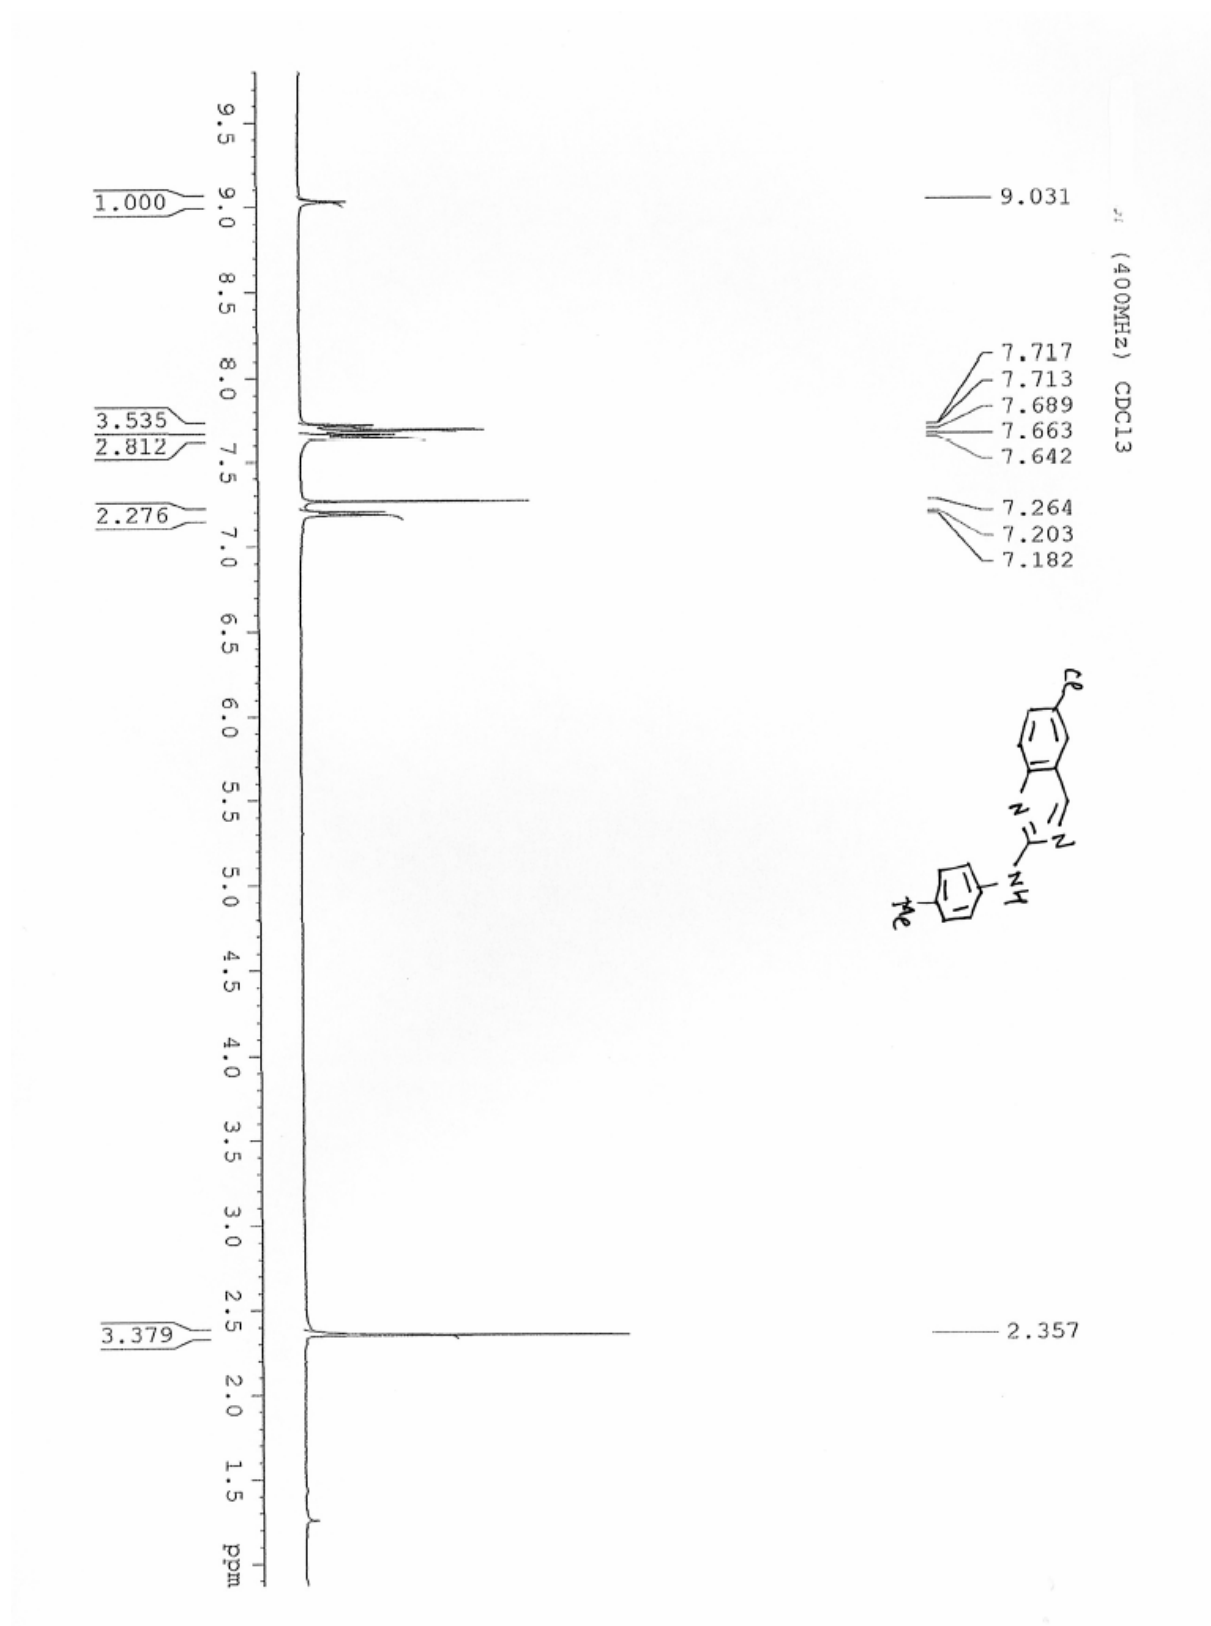

$^{13}\text{C}$  NMR of **15c**

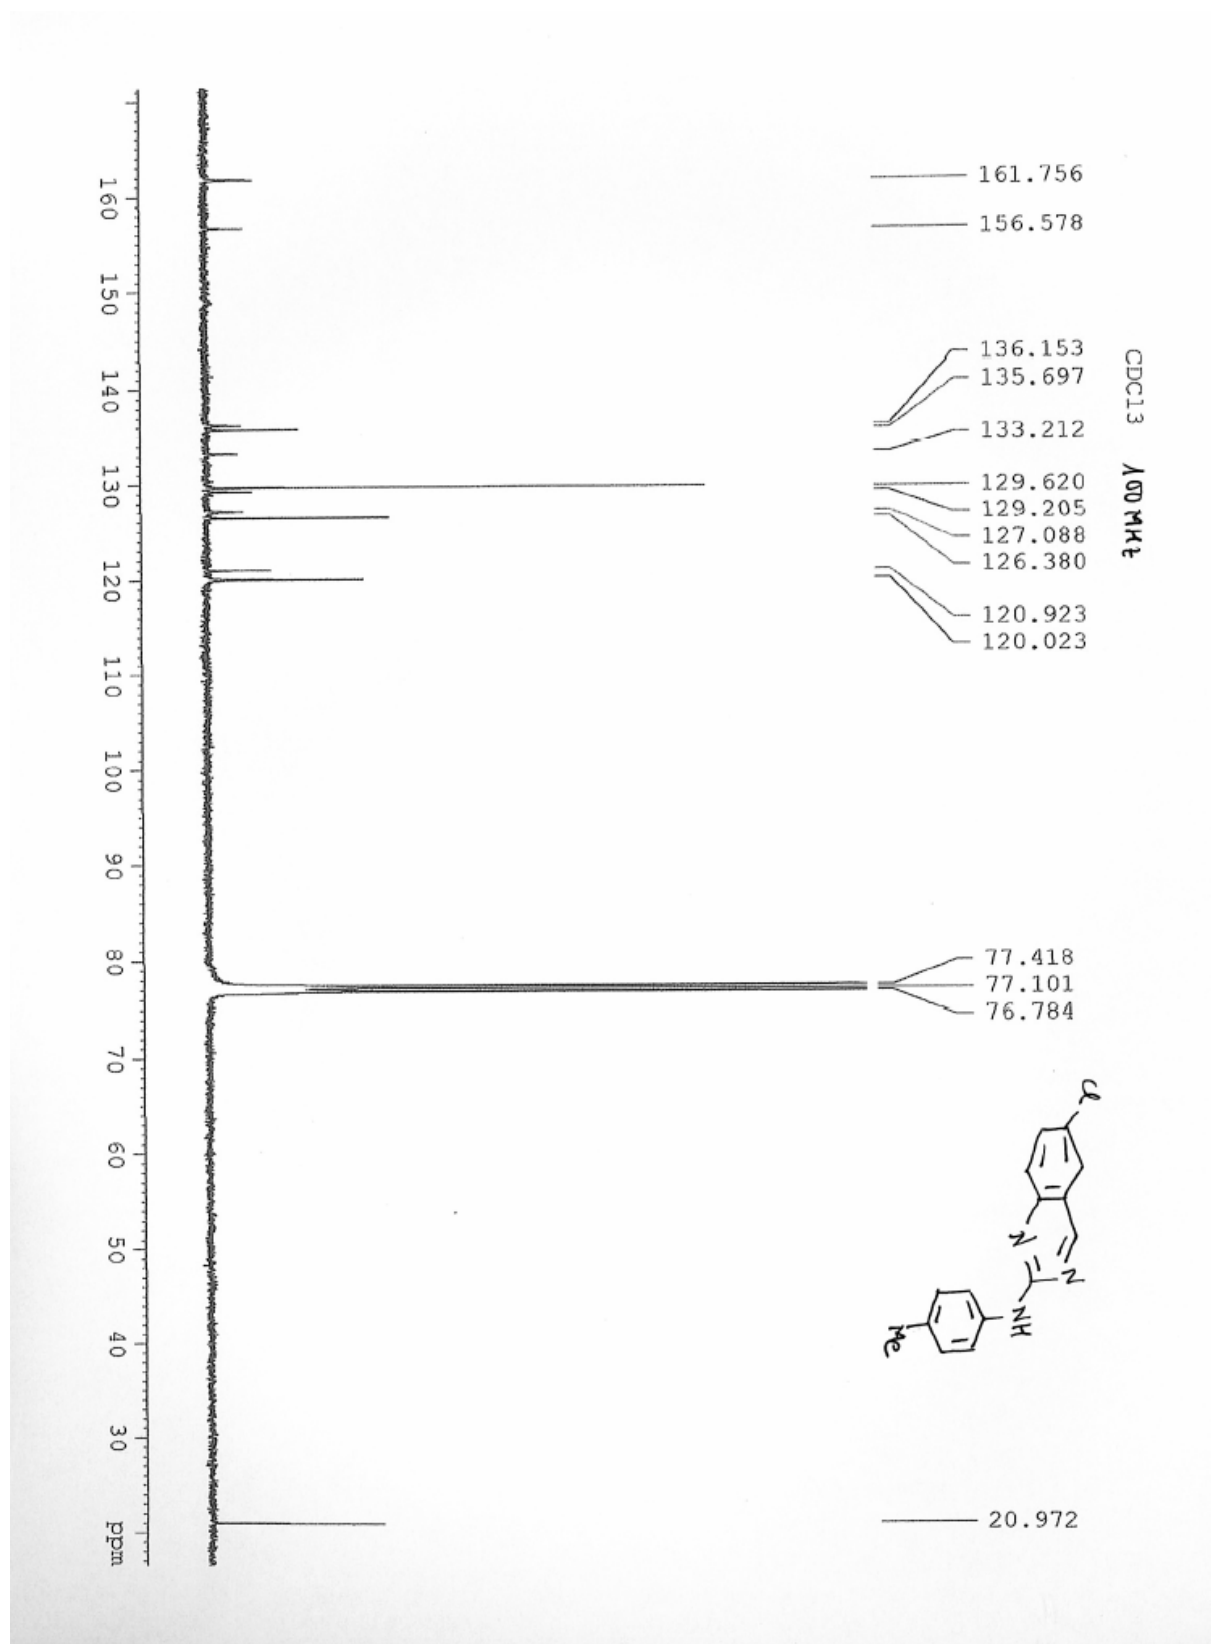

<sup>1</sup>H NMR of **15d**

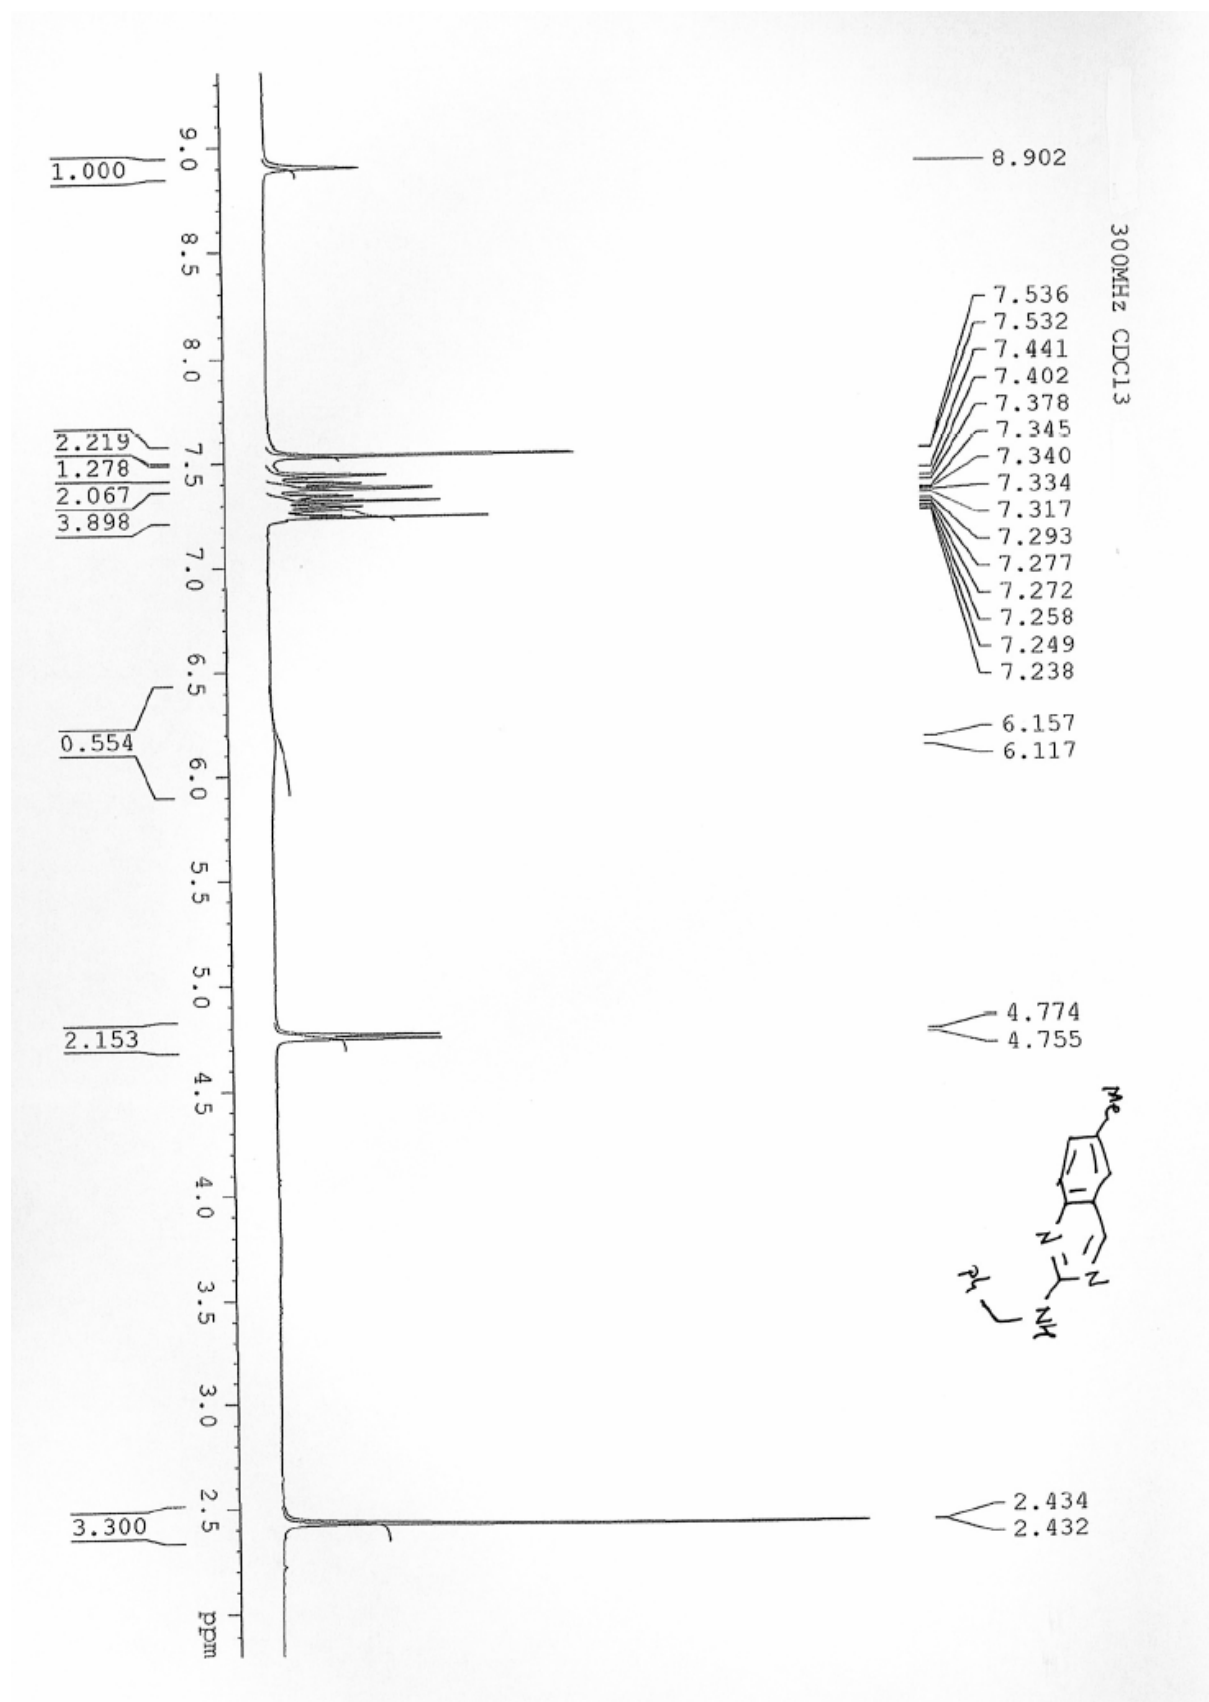

$^{13}\text{C}$  NMR of **15d**

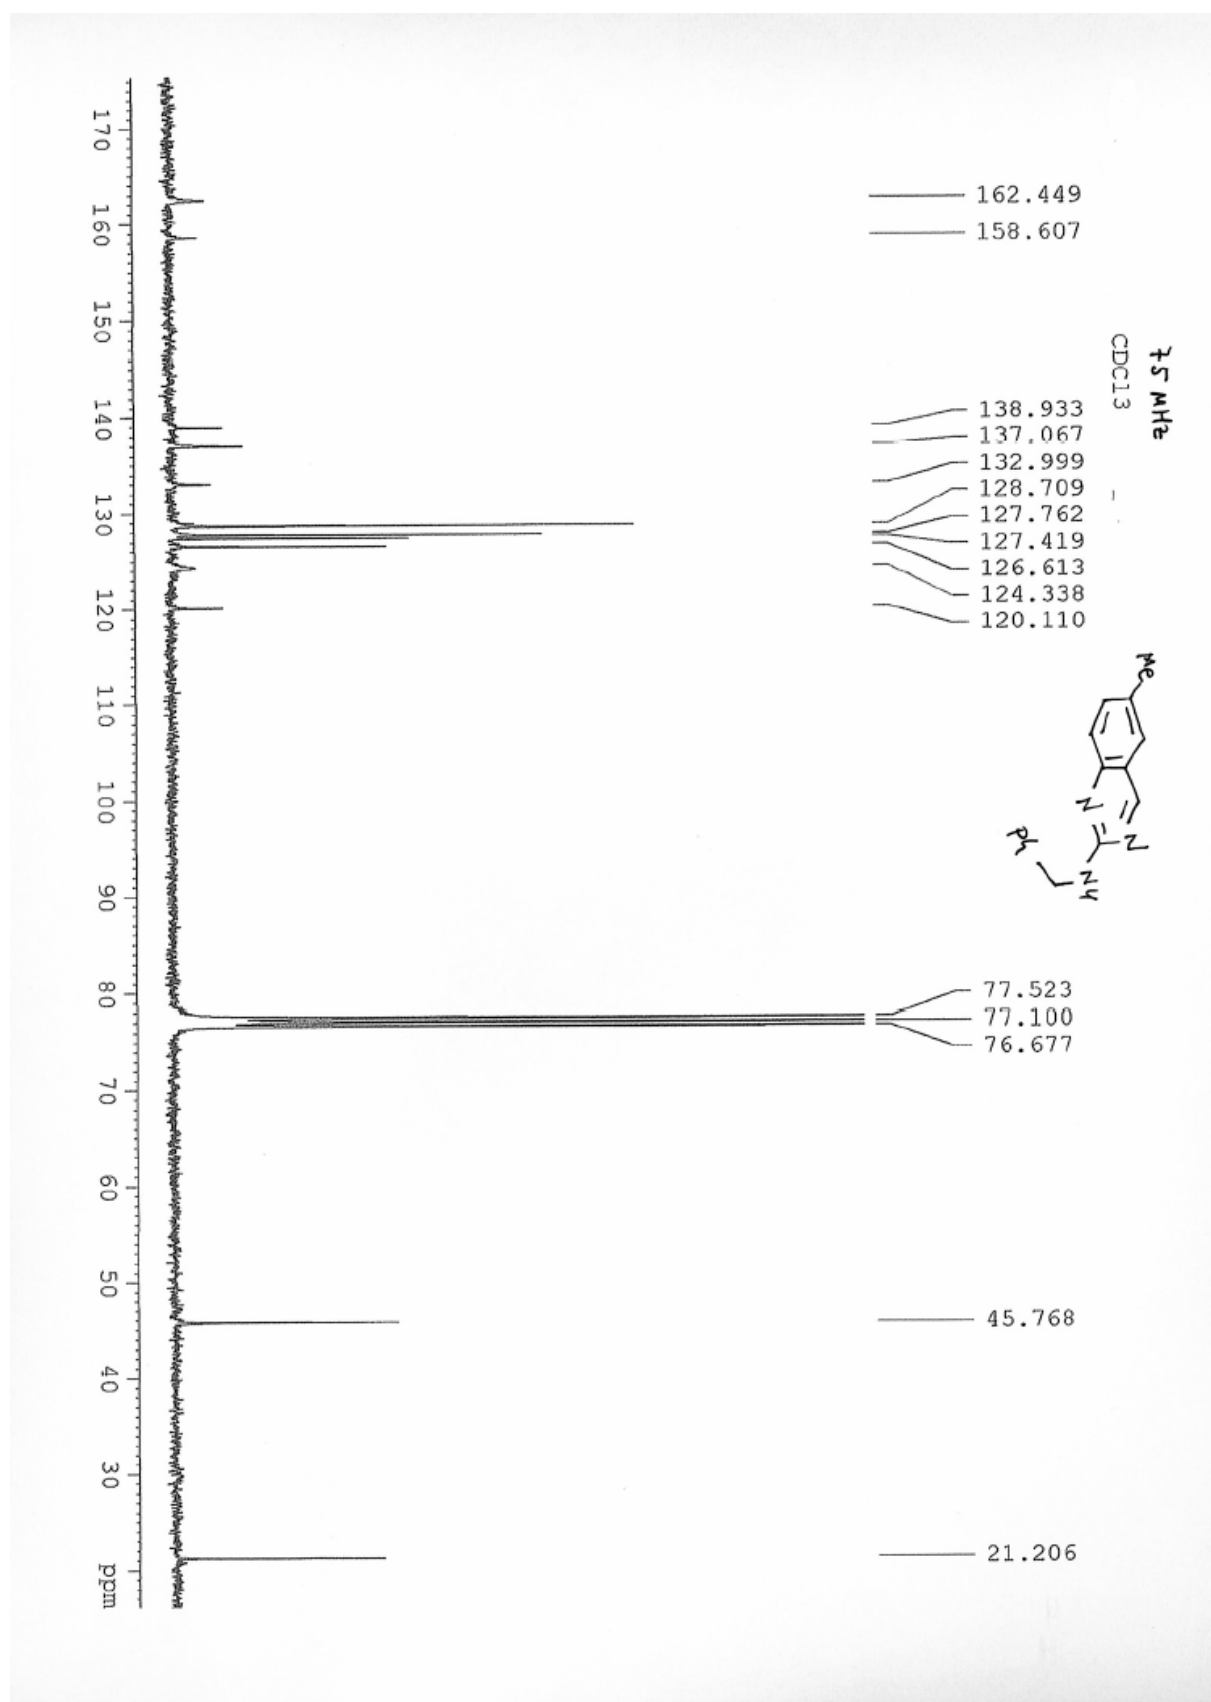

Supplement: c1ob05745f.pdf [file c1ob05745f.pdf]
